# Supplementary material for: Accommodating individual travel history, global mobility, and unsampled diversity in phylogeography: a SARS-CoV-2 case study
Source: PubMed Central journal article supplement (PMC7315996; doi:10.1101/2020.06.22.165464), 2020-06-23
Supplement: media-1.pdf [file media-1.pdf]

## Supplementary Information for:

### Accommodating individual travel history, global mobility, and unsampled diversity in phylogeography: a SARS-CoV-2 case study.

**Authors:** Philippe Lemey<sup>1\*</sup>, Samuel Hong<sup>1</sup>, Verity Hill<sup>2</sup>, Guy Baele<sup>1</sup>, Chiara Poletta<sup>3</sup>, Vittoria Colizza<sup>3</sup>, Áine O'Toole<sup>2</sup>, John T. McCrone<sup>2</sup>, Kristian G. Andersen<sup>4</sup>, Martha Nelson<sup>5</sup>, Michael Worobey<sup>6</sup>, Andrew Rambaut<sup>2,7</sup> and Marc A. Suchard<sup>8,9,10\*</sup>

#### **Affiliations:**

<sup>1</sup> KU Leuven Department of Microbiology, Immunology and Transplantation, Rega Institute, Laboratory of Clinical and Evolutionary Virology, Leuven, Belgium.

<sup>2</sup> Centre for Immunology, Infection and Evolution, University of Edinburgh, King's Buildings, Edinburgh, EH9 3FL, UK.

<sup>3</sup> INSERM, Sorbonne Université, Institut Pierre Louis d'Epidémiologie et de Santé Publique IPLESP, F75012 Paris, France.

<sup>4</sup> Department of Immunology and Microbiology, Scripps Research, La Jolla, CA 92037, USA

<sup>5</sup> Division of International Epidemiology and Population Studies, Fogarty International Center, National Institutes of Health, Bethesda, Maryland 20892, USA.

<sup>6</sup> Department of Ecology and Evolutionary Biology, University of Arizona, Tucson, AZ 85721, USA.

<sup>7</sup> Fogarty International Center, National Institutes of Health, Bethesda, MD, USA.

<sup>8</sup> Department of Biomathematics, David Geffen School of Medicine, University of California Los Angeles, Los Angeles, CA 90095, USA

<sup>9</sup> Department of Biostatistics, Fielding School of Public Health, University of California Los Angeles, Los Angeles, CA 90095, USA

<sup>10</sup> Department of Human Genetics, David Geffen School of Medicine, University of California Los Angeles, Los Angeles, CA 90095, USA

\*Correspondence to: [philippe.lemey@kuleuven.be](mailto:philippe.lemey@kuleuven.be), [msuchard@ucla.edu](mailto:msuchard@ucla.edu)

## Bayesian Evaluation of Temporal Signal (BETS)

As part of the BETS analysis to assess temporal signal in the data, we estimate the performance of the strict clock and the relaxed clock with an underlying lognormal distribution, with and without making use of the sequence sampling times. We make use of generalized stepping-stone sampling while accommodating phylogenetic uncertainty <sup>1</sup> to estimate log marginal likelihoods for these four models in BEAST 1.10 <sup>2</sup>, running an initial Markov chain of 25 million iterations followed by 100 power posteriors of 1 million iterations each.

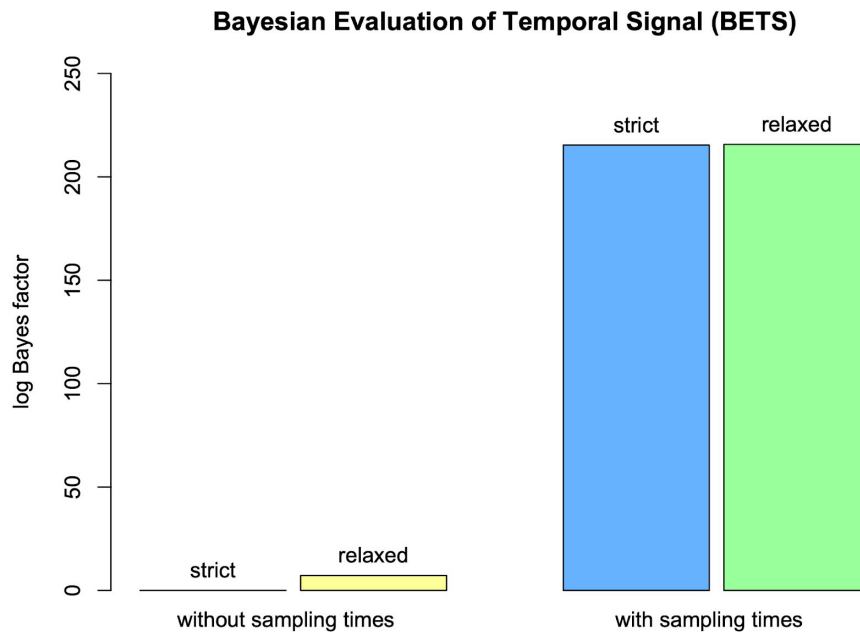

Figure S1: BETS reveals very strong evidence (log Bayes factors > 215) in favor of the models including sampling times, indicative of strong temporal signal in the data. The relaxed clock offers a marginal improvement of 0.3 log units in fit over the strict clock when using sampling times.

Figure S1 summarizes the results of the BETS analysis, which were repeated across multiple independent replicates and with increasing computational settings. When including the sampling times in the analysis of the data, model fit increases significantly and yields very strong evidence (log Bayes factors  $> 215$ ) in favor of using the sampling time information <sup>3</sup>, with strict and relaxed clock offering near-identical performance (log Bayes factor of 0.3 in favor of the latter).

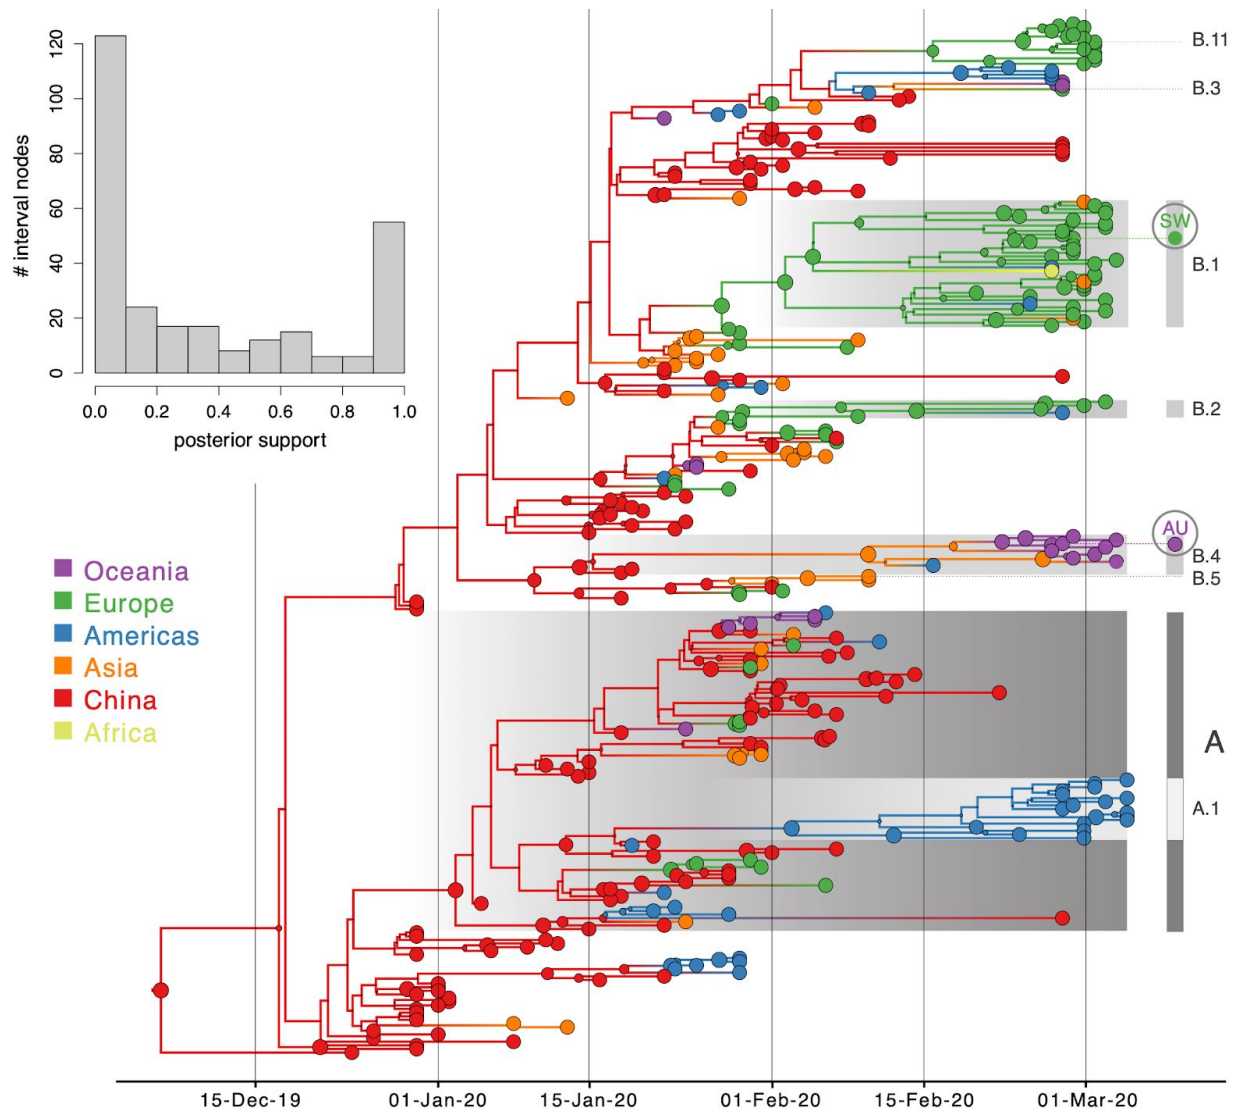

Figure S2. Bayesian phylogeographic reconstruction for the full data set incorporating travel history data. This figure mirrors Fig.4 in the main manuscript, but uses color shading for all the locations included in the analysis.

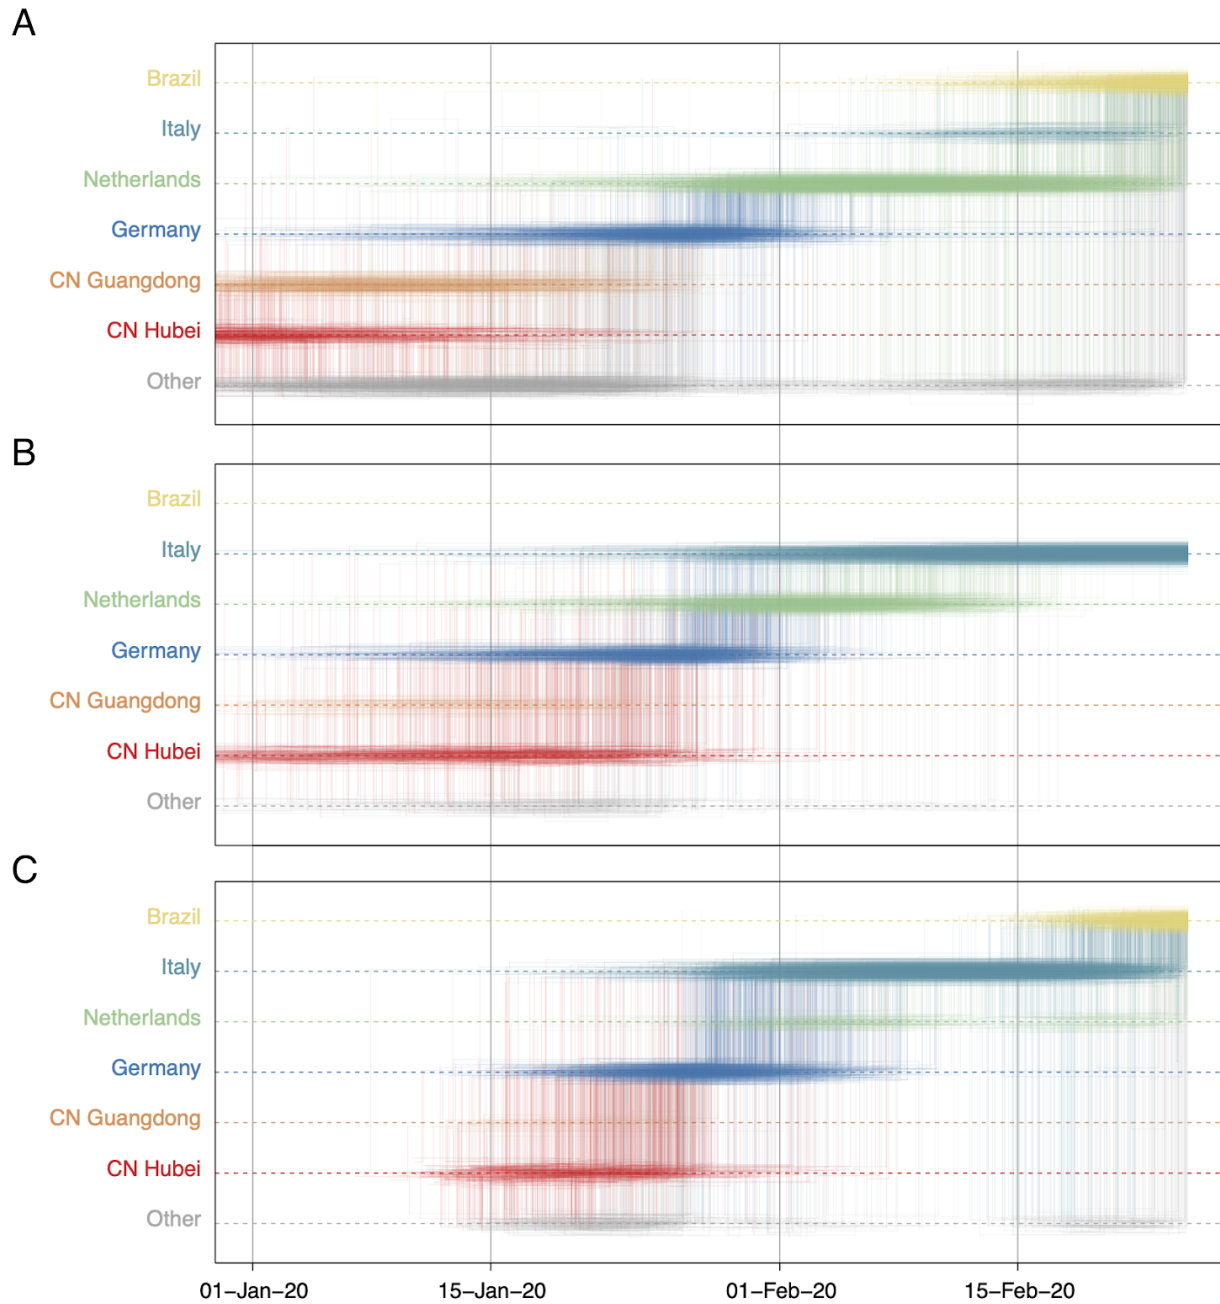

Figure S3. Markov jump trajectory plot depicting the ancestral transition history between locations from Hubei up the sampling location for a Brazilian genome (EPI\_ISL\_412964) in lineage B1 using (A) sampling location only, (B) travel origin location and (C) sampling location and travel history. The trajectories are summarized from a posterior tree distribution with Markov jump history annotation

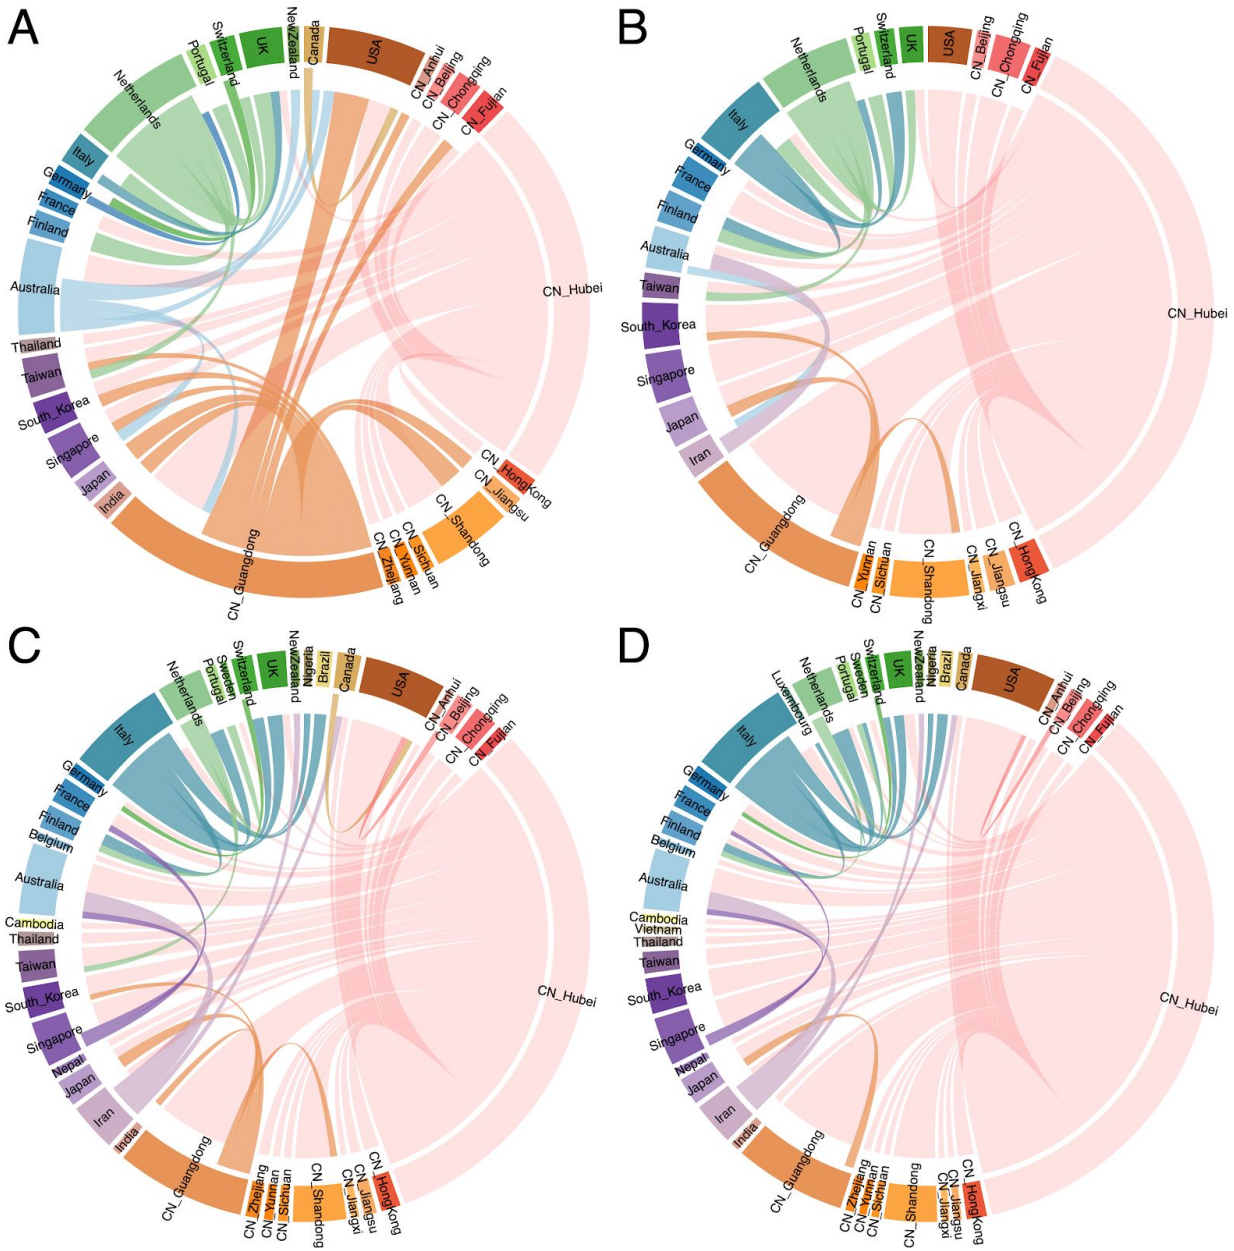

Figure S4. Circular migration flow plots summarizing Markov jump estimates for the analyses using (A) sampling location only, (B) travel origin location, (C) sampling location and travel history and (D) sampling location and travel history, with unsampled diversity. This figure mirrors Fig. 9 in the main manuscript, but uses transparency for transitions from Hubei to emphasize the 'secondary' migration dynamics.

**Table S1.** Travel history data associated with 64 of the 284 genomes.

| <b>GISAID accession number</b> | <b>sampling location</b> | <b>sampling date</b> | <b>travel location</b> | <b>Travel date (days before collection date)</b> |
|--------------------------------|--------------------------|----------------------|------------------------|--------------------------------------------------|
| EPI_ISL_403932                 | CN Guangdong             | 2020-01-14           | CN Hubei               | 16                                               |
| EPI_ISL_403936                 | CN Guangdong             | 2020-01-17           | CN Hubei               | 6                                                |
| EPI_ISL_403937                 | CN Guangdong             | 2020-01-18           | CN Hubei               | 6                                                |
| EPI_ISL_403962                 | Thailand                 | 2020-01-08           | CN Hubei               | 1*                                               |
| EPI_ISL_403963                 | Thailand                 | 2020-01-13           | CN Hubei               | 1*                                               |
| EPI_ISL_404227                 | CN Zhejiang              | 2020-01-16           | CN Hubei               | NA                                               |
| EPI_ISL_404228                 | CN Zhejiang              | 2020-01-17           | CN Hubei               | NA                                               |
| EPI_ISL_404253                 | USA                      | 2020-01-21           | CN Hubei               | 12                                               |
| EPI_ISL_404895                 | USA                      | 2020-01-19           | CN Hubei               | 9                                                |
| EPI_ISL_406034                 | USA                      | 2020-01-23           | CN Hubei               | NA                                               |
| EPI_ISL_406036                 | USA                      | 2020-01-22           | CN Hubei               | NA                                               |
| EPI_ISL_406223                 | USA                      | 2020-01-22           | CN Hubei               | NA                                               |
| EPI_ISL_406597                 | France                   | 2020-01-23           | CN Hubei               | NA                                               |
| EPI_ISL_406844                 | Australia                | 2020-01-25           | CN Hubei               | 6                                                |
| EPI_ISL_406862                 | Germany                  | 2020-01-28           | CN Hubei (2)           | 9 + x (2)                                        |
| EPI_ISL_406970                 | CN Zhejiang              | 2020-01-20           | CN Hubei               | NA                                               |
| EPI_ISL_406973                 | Singapore                | 2020-01-23           | CN Hubei               | NA                                               |
| EPI_ISL_407079                 | Finland                  | 2020-01-29           | CN Hubei               | 6                                                |
| EPI_ISL_407313                 | CN Zhejiang              | 2020-01-19           | CN Hubei               | NA                                               |
| EPI_ISL_407893                 | Australia                | 2020-01-24           | CN Hubei               | 6                                                |



|                |             |            |               |        |
|----------------|-------------|------------|---------------|--------|
| EPI_ISL_407894 | Australia   | 2020-01-28 | CN Hubei      | 1      |
| EPI_ISL_407896 | Australia   | 2020-01-30 | CN Hubei      | 3      |
| EPI_ISL_407976 | Belgium     | 2020-02-03 | CN Hubei      | 2      |
| EPI_ISL_408008 | USA         | 2020-01-29 | CN Hubei      | NA     |
| EPI_ISL_408010 | USA         | 2020-01-29 | CN Hubei      | 6      |
| EPI_ISL_408489 | Taiwan      | 2020-01-31 | CN Hubei      | 11     |
| EPI_ISL_408668 | Vietnam     | 2020-01-24 | CN Hubei      | 7      |
| EPI_ISL_408670 | USA         | 2020-01-31 | CN Beijing    | NA     |
| EPI_ISL_408976 | Australia   | 2020-01-22 | CN Hubei      | 2      |
| EPI_ISL_408977 | Australia   | 2020-01-25 | CN Hubei      | 2      |
| EPI_ISL_409067 | USA         | 2020-01-29 | CN Hubei      | 1      |
| EPI_ISL_410218 | Taiwan      | 2020-02-05 | CN Hubei      | NA     |
| EPI_ISL_410301 | Nepal       | 2020-01-13 | CN Hubei      | 1*     |
| EPI_ISL_410486 | France      | 2020-02-08 | Singapore (2) | 15 (2) |
| EPI_ISL_410545 | Italy       | 2020-01-29 | CN Hubei      | 6      |
| EPI_ISL_410717 | Australia   | 2020-02-05 | CN Hubei      | 9      |
| EPI_ISL_410718 | Australia   | 2020-02-05 | CN Hubei      | 9      |
| EPI_ISL_411902 | Cambodia    | 2020-01-27 | CN Hubei      | 4      |
| EPI_ISL_411929 | South Korea | 2020-01    | CN Hubei      | NA     |
| EPI_ISL_411951 | Sweden      | 2020-02-07 | CN Hubei      | 14     |
| EPI_ISL_411954 | USA         | 2020-02-06 | CN Hubei      | 1      |
| EPI_ISL_411955 | USA         | 2020-02-10 | CN Hubei      | 5      |
| EPI_ISL_411956 | USA         | 2020-02-11 | CN Hubei      | 6      |
| EPI_ISL_412116 | UK          | 2020-02-09 | China         | 2      |
| EPI_ISL_412912 | Germany     | 2020-02-25 | Italy         | NA     |

|                |             |            |           |    |
|----------------|-------------|------------|-----------|----|
| EPI_ISL_412964 | Brazil      | 2020-02-25 | Italy     | 4  |
| EPI_ISL_412965 | Canada      | 2020-02-16 | Iran      | 7  |
| EPI_ISL_412971 | Finland     | 2020-02-25 | Italy     | 2  |
| EPI_ISL_412972 | Mexico      | 2020-02-27 | Italy     | 5  |
| EPI_ISL_412975 | Australia   | 2020-02-28 | Iran      | 6  |
| EPI_ISL_413014 | Canada      | 2020-01-25 | CN Hubei  | 7  |
| EPI_ISL_413015 | Canada      | 2020-01-23 | CN Hubei  | NA |
| EPI_ISL_413016 | Brazil      | 2020-02-28 | Italy     | 1  |
| EPI_ISL_413213 | Australia   | 2020-02-29 | Iran      | 6  |
| EPI_ISL_413221 | UK          | 2020-03-02 | Italy     | 7  |
| EPI_ISL_413490 | New Zealand | 2020-02-27 | Iran      | 1  |
| EPI_ISL_413522 | India       | 2020-01-27 | China     | NA |
| EPI_ISL_413523 | India       | 2020-01-27 | China     | 10 |
| EPI_ISL_413550 | Nigeria     | 2020-02-27 | Italy     | 2  |
| EPI_ISL_413594 | Australia   | 2020-02-28 | Singapore | 1* |
| EPI_ISL_413596 | Australia   | 2020-02-28 | SE Asia   | NA |
| EPI_ISL_413597 | Australia   | 2020-03-02 | Iran      | 3  |
| EPI_ISL_413598 | Australia   | 2020-03-04 | Iran      | 3  |
| EPI_ISL_413599 | Australia   | 2020-03-04 | Iran      | NA |

\* when the collection date was the same as the travel date, a minimum of 1 day prior to the collection date was used as the date of travel.

(2) the travel location and date was used for the person having infected the sampled person. For EPI\_ISL\_406862, x was set to 5 days.

**Table S2.** Acknowledgements table for the 284 genomes used in this study

| Accession ID   | Virus name                       | Location                     | Collection date | Originating lab                                                                                   | Submitting lab                                                                                                                          | Authors                                                                                                                                                                                                                                                                               |
|----------------|----------------------------------|------------------------------|-----------------|---------------------------------------------------------------------------------------------------|-----------------------------------------------------------------------------------------------------------------------------------------|---------------------------------------------------------------------------------------------------------------------------------------------------------------------------------------------------------------------------------------------------------------------------------------|
| EPI_ISL_402119 | hCoV-19/Wuhan/IVDC-HB-01/2019    | Asia / China / Hubei / Wuhan | 2019-12-30      | National Institute for Viral Disease Control and Prevention, China CDC                            | National Institute for Viral Disease Control and Prevention, China CDC                                                                  | Wenjie Tan, Xiang Zhao, Wenling Wang, Xuejun Ma, Yongzhong Jiang, Roujian Lu, Ji Wang, Weimin Zhou, Peihua Niu, Peipei Liu, Faxian Zhan, Weifeng Shi, Baoying Huang, Jun Liu, Li Zhao, Yao Meng, Xiaozhou He, Fei Ye, Na Zhu, Yang Li, Jing Chen, Wenbo Xu, George F. Gao, Guizhen Wu |
| EPI_ISL_402120 | hCoV-19/Wuhan/IVDC-HB-04/2020    | Asia / China / Hubei / Wuhan | 2020-01-01      | National Institute for Viral Disease Control and Prevention, China CDC                            | National Institute for Viral Disease Control and Prevention, China CDC                                                                  | Wenjie Tan, Xiang Zhao, Wenling Wang, Xuejun Ma, Yongzhong Jiang, Roujian Lu, Ji Wang, Weimin Zhou, Peihua Niu, Peipei Liu, Faxian Zhan, Weifeng Shi, Baoying Huang, Jun Liu, Li Zhao, Yao Meng, Xiaozhou He, Fei Ye, Na Zhu, Yang Li, Jing Chen, Wenbo Xu, George F. Gao, Guizhen Wu |
| EPI_ISL_402121 | hCoV-19/Wuhan/IVDC-HB-05/2019    | Asia / China / Hubei / Wuhan | 2019-12-30      | National Institute for Viral Disease Control and Prevention, China CDC                            | National Institute for Viral Disease Control and Prevention, China CDC                                                                  | Wenjie Tan, Xuejun Ma, Xiang Zhao, Wenling Wang, Yongzhong Jiang, Roujian Lu, Ji Wang, Peihua Niu, Weimin Zhou, Faxian Zhan, Weifeng Shi, Baoying Huang, Jun Liu, Li Zhao, Yao Meng, Fei Ye, Na Zhu, Xiaozhou He, Peipei Liu, Yang Li, Jing Chen, Wenbo Xu, George F. Gao, Guizhen Wu |
| EPI_ISL_402123 | hCoV-19/Wuhan/IPBCAMS-WH-01/2019 | Asia / China / Hubei / Wuhan | 2019-12-24      | Institute of Pathogen Biology, Chinese Academy of Medical Sciences & Peking Union Medical College | Institute of Pathogen Biology, Chinese Academy of Medical Sciences & Peking Union Medical College                                       | Lili Ren, Jianwei Wang, Qi Jin, Zichun Xiang, Zhiqiang Wu, Chao Wu, Yiwei Liu                                                                                                                                                                                                         |
| EPI_ISL_402124 | hCoV-19/Wuhan/WIV04/2019         | Asia / China / Hubei / Wuhan | 2019-12-30      | Wuhan Jinyintan Hospital                                                                          | Wuhan Institute of Virology, Chinese Academy of Sciences                                                                                | Peng Zhou, Xing-Lou Yang, Ding-Yu Zhang, Lei Zhang, Yan Zhu, Hao-Rui Si, Zhengli Shi                                                                                                                                                                                                  |
| EPI_ISL_402125 | hCoV-19/Wuhan-Hu-1/2019          | Asia / China                 | 2019-12-31      | unknown                                                                                           | National Institute for Communicable Disease Control and Prevention (ICDC) Chinese Center for Disease Control and Prevention (China CDC) | Zhang,Y.-Z., Wu,F., Chen,Y.-M., Pei,Y.-Y., Xu,L., Wang,W., Zhao,S., Yu,B., Hu,Y., Tao,Z.-W., Song,Z.-G., Tian,J.-H., Zhang,Y.-L., Liu,Y., Zheng,J.-J., Dai,F.-H., Wang,Q.-M., She,J.-L. and Zhu,T.-Y.                                                                                 |
| EPI_ISL_402127 | hCoV-19/Wuhan/WIV02/2019         | Asia / China / Hubei / Wuhan | 2019-12-30      | Wuhan Jinyintan Hospital                                                                          | Wuhan Institute of Virology, Chinese Academy of Sciences                                                                                | Peng Zhou, Xing-Lou Yang, Ding-Yu Zhang, Lei Zhang, Yan Zhu, Hao-Rui Si, Zhengli Shi                                                                                                                                                                                                  |
| EPI_ISL_402128 | hCoV-19/Wuhan/WIV05/2019         | Asia / China / Hubei / Wuhan | 2019-12-30      | Wuhan Jinyintan Hospital                                                                          | Wuhan Institute of Virology, Chinese Academy of Sciences                                                                                | Peng Zhou, Xing-Lou Yang, Ding-Yu Zhang, Lei Zhang, Yan Zhu, Hao-Rui Si, Zhengli Shi                                                                                                                                                                                                  |
| EPI_ISL_402129 | hCoV-19/Wuhan/WIV06/2019         | Asia / China / Hubei / Wuhan | 2019-12-30      | Wuhan Jinyintan Hospital                                                                          | Wuhan Institute of Virology, Chinese Academy of Sciences                                                                                | Peng Zhou, Xing-Lou Yang, Ding-Yu Zhang, Lei Zhang, Yan Zhu, Hao-Rui Si, Zhengli Shi                                                                                                                                                                                                  |
| EPI_ISL_402130 | hCoV-19/Wuhan/WIV07/2019         | Asia / China / Hubei / Wuhan | 2019-12-30      | Wuhan Jinyintan Hospital                                                                          | Wuhan Institute of Virology, Chinese Academy of Sciences                                                                                | Peng Zhou, Xing-Lou Yang, Ding-Yu Zhang, Lei Zhang, Yan Zhu, Hao-Rui Si, Zhengli Shi                                                                                                                                                                                                  |
| EPI_ISL_402132 | hCoV-19/Wuhan/HBCDC-HB-01/2019   | Asia / China / Hubei / Wuhan | 2019-12-30      | Wuhan Jinyintan Hospital                                                                          | Hubei Provincial Center for Disease Control and Prevention                                                                              | Bin Fang, Xiang Li, Xiao Yu, Linlin Liu, Bo Yang, Faxian Zhan, Guojun Ye, Xixiang Huo, Junqiang Xu, Bo Yu, Kun Cai, Jing Li, Yongzhong Jiang.                                                                                                                                         |
| EPI_ISL_403928 | hCoV-19/Wuhan/IPBCAMS-WH-05/2020 | Asia / China / Hubei / Wuhan | 2020-01-01      | Institute of Pathogen Biology, Chinese Academy                                                    | Institute of Pathogen Biology, Chinese Academy of Medical                                                                               | Lili Ren, Jianwei Wang, Qi Jin, Zichun Xiang, Zhiqiang Wu, Chao Wu, Yiwei Liu                                                                                                                                                                                                         |

|                |                                  |                                     |            |                                                                                                     |                                                                                                   |                                                                                                                                                                                                                                                                                                                                                                                                        |
|----------------|----------------------------------|-------------------------------------|------------|-----------------------------------------------------------------------------------------------------|---------------------------------------------------------------------------------------------------|--------------------------------------------------------------------------------------------------------------------------------------------------------------------------------------------------------------------------------------------------------------------------------------------------------------------------------------------------------------------------------------------------------|
|                |                                  |                                     |            | of Medical Sciences & Peking Union Medical College                                                  | Sciences & Peking Union Medical College                                                           |                                                                                                                                                                                                                                                                                                                                                                                                        |
| EPI_ISL_403929 | hCoV-19/Wuhan/IPBCAMS-WH-04/2019 | Asia / China / Hubei / Wuhan        | 2019-12-30 | Institute of Pathogen Biology, Chinese Academy of Medical Sciences & Peking Union Medical College   | Institute of Pathogen Biology, Chinese Academy of Medical Sciences & Peking Union Medical College | Lili Ren, Jianwei Wang, Qi Jin, Zichun Xiang, Zhiqiang Wu, Chao Wu, Yiwei Liu                                                                                                                                                                                                                                                                                                                          |
| EPI_ISL_403930 | hCoV-19/Wuhan/IPBCAMS-WH-03/2019 | Asia / China / Hubei / Wuhan        | 2019-12-30 | Institute of Pathogen Biology, Chinese Academy of Medical Sciences & Peking Union Medical College   | Institute of Pathogen Biology, Chinese Academy of Medical Sciences & Peking Union Medical College | Lili Ren, Jianwei Wang, Qi Jin, Zichun Xiang, Zhiqiang Wu, Chao Wu, Yiwei Liu                                                                                                                                                                                                                                                                                                                          |
| EPI_ISL_403931 | hCoV-19/Wuhan/IPBCAMS-WH-02/2019 | Asia / China / Hubei / Wuhan        | 2019-12-30 | Institute of Pathogen Biology, Chinese Academy of Medical Sciences & Peking Union Medical College   | Institute of Pathogen Biology, Chinese Academy of Medical Sciences & Peking Union Medical College | Lili Ren, Jianwei Wang, Qi Jin, Zichun Xiang, Zhiqiang Wu, Chao Wu, Yiwei Liu                                                                                                                                                                                                                                                                                                                          |
| EPI_ISL_403932 | hCoV-19/Guangdong/20SF012/2020   | Asia / China / Guangdong / Shenzhen | 2020-01-14 | Guangdong Provincial Center for Diseases Control and Prevention; Guangdong Provincial Public Health | Department of Microbiology, Guangdong Provincial Center for Diseases Control and Prevention       | Min Kang, Jie Wu, Jing Lu, Tao Liu, Baisheng Li, Shujiang Mei, Feng Ruan, Lifeng Lin, Changwen Ke, Haojie Zhong, Yingtao Zhang, Lirong Zou, Xuguang Chen, Qi Zhu, Jianpeng Xiao, Jianxiang Geng, Zhe Liu, Jianxiong Hu, Weilin Zeng, Xing Li, Yuhuang Liao, Xiujian Tang, Songjian Xiao, Ying Wang, Yingchao Song, Xue Zhuang, Lijun Liang, Guanhao He, Huihong Deng, Tie Song, Jianfeng He, Wenjun Ma |
| EPI_ISL_403933 | hCoV-19/Guangdong/20SF013/2020   | Asia / China / Guangdong / Shenzhen | 2020-01-15 | Guangdong Provincial Center for Diseases Control and Prevention; Guangdong Provincial Public Health | Department of Microbiology, Guangdong Provincial Center for Diseases Control and Prevention       | Min Kang, Jie Wu, Jing Lu, Tao Liu, Baisheng Li, Shujiang Mei, Feng Ruan, Lifeng Lin, Changwen Ke, Haojie Zhong, Yingtao Zhang, Lirong Zou, Xuguang Chen, Qi Zhu, Jianpeng Xiao, Jianxiang Geng, Zhe Liu, Jianxiong Hu, Weilin Zeng, Xing Li, Yuhuang Liao, Xiujian Tang, Songjian Xiao, Ying Wang, Yingchao Song, Xue Zhuang, Lijun Liang, Guanhao He, Huihong Deng, Tie Song, Jianfeng He, Wenjun Ma |
| EPI_ISL_403934 | hCoV-19/Guangdong/20SF014/2020   | Asia / China / Guangdong / Shenzhen | 2020-01-15 | Guangdong Provincial Center for Diseases Control and Prevention; Guangdong Provincial Public Health | Department of Microbiology, Guangdong Provincial Center for Diseases Control and Prevention       | Min Kang, Jie Wu, Jing Lu, Tao Liu, Baisheng Li, Shujiang Mei, Feng Ruan, Lifeng Lin, Changwen Ke, Haojie Zhong, Yingtao Zhang, Lirong Zou, Xuguang Chen, Qi Zhu, Jianpeng Xiao, Jianxiang Geng, Zhe Liu, Jianxiong Hu, Weilin Zeng, Xing Li, Yuhuang Liao, Xiujian Tang, Songjian Xiao, Ying Wang, Yingchao Song, Xue Zhuang, Lijun Liang, Guanhao He, Huihong Deng, Tie Song, Jianfeng He, Wenjun Ma |
| EPI_ISL_403935 | hCoV-19/Guangdong/20SF025/2020   | Asia / China / Guangdong / Shenzhen | 2020-01-15 | Guangdong Provincial Center for Diseases Control and Prevention; Guangdong Provincial Public Health | Department of Microbiology, Guangdong Provincial Center for Diseases Control and Prevention       | Min Kang, Jie Wu, Jing Lu, Tao Liu, Baisheng Li, Shujiang Mei, Feng Ruan, Lifeng Lin, Changwen Ke, Haojie Zhong, Yingtao Zhang, Lirong Zou, Xuguang Chen, Qi Zhu, Jianpeng Xiao, Jianxiang Geng, Zhe Liu, Jianxiong Hu, Weilin Zeng, Xing Li, Yuhuang Liao, Xiujian Tang, Songjian Xiao, Ying Wang, Yingchao Song, Xue Zhuang, Lijun Liang, Guanhao He, Huihong Deng, Tie Song, Jianfeng He, Wenjun Ma |
| EPI_ISL_403936 | hCoV-19/Guangdong/20SF028/2020   | Asia / China / Guangdong / Zhuhai   | 2020-01-17 | Guangdong Provincial Center for Diseases Control and                                                | Department of Microbiology, Guangdong Provincial Center for Diseases                              | Min Kang, Jie Wu, Jing Lu, Tao Liu, Baisheng Li, Shujiang Mei, Feng Ruan, Lifeng Lin, Changwen Ke, Haojie Zhong, Yingtao Zhang, Lirong Zou, Xuguang Chen, Qi Zhu, Jianpeng Xiao, Jianxiang                                                                                                                                                                                                             |

|                    |                                        |                                                                       |            |                                                                                                                          |                                                                                                                                                                                                                                                      |                                                                                                                                                                                                                                                                                                                                                                                                                                |
|--------------------|----------------------------------------|-----------------------------------------------------------------------|------------|--------------------------------------------------------------------------------------------------------------------------|------------------------------------------------------------------------------------------------------------------------------------------------------------------------------------------------------------------------------------------------------|--------------------------------------------------------------------------------------------------------------------------------------------------------------------------------------------------------------------------------------------------------------------------------------------------------------------------------------------------------------------------------------------------------------------------------|
|                    |                                        |                                                                       |            | Prevention;<br>Guangdong<br>Provincial Public<br>Health                                                                  | Control<br>and<br>Prevention                                                                                                                                                                                                                         | Geng, Zhe Liu, Jianxiong Hu, Weilin Zeng, Xing Li,<br>Yuhuang Liao, Xiujuan Tang, Songjian Xiao, Ying<br>Wang, Yingchao Song, Xue Zhuang, Lijun Liang,<br>Guanhao He, Huihong Deng, Tie Song, Jianfeng<br>He, Wenjun Ma                                                                                                                                                                                                        |
| EPI_ISL_<br>403937 | hCoV-19/Guang<br>dong/20SF04<br>0/2020 | Asia / China<br>/<br>Guangdong<br>/<br>Zhuhai                         | 2020-01-18 | Guangdong<br>Provincial Center<br>for Diseases<br>Control and<br>Prevention;<br>Guangdong<br>Provincial Public<br>Health | Department<br>of<br>Microbiology,<br>Guangdong Provincial<br>Center for Diseases<br>Control and<br>Prevention                                                                                                                                        | Min Kang, Jie Wu, Jing Lu, Tao Liu, Baisheng Li,<br>Shujiang Mei, Feng Ruan, Lifeng Lin, Changwen<br>Ke, Haojie Zhong, Yingtao Zhang, Lirong Zou,<br>Xuguang Chen, Qi Zhu, Jianpeng Xiao, Jianxiang<br>Geng, Zhe Liu, Jianxiong Hu, Weilin Zeng, Xing Li,<br>Yuhuang Liao, Xiujuan Tang, Songjian Xiao, Ying<br>Wang, Yingchao Song, Xue Zhuang, Lijun Liang,<br>Guanhao He, Huihong Deng, Tie Song, Jianfeng<br>He, Wenjun Ma |
| EPI_ISL_<br>403962 | hCoV-19/Thail<br>and/61/2020           | Asia /<br>Thailand /<br>Nonthaburi                                    | 2020-01-08 | Bamrasnaradura<br>Hospital                                                                                               | 1. Department of<br>Medical Sciences,<br>Ministry of Public<br>Health, Thailand 2.<br>Thai Red Cross<br>Emerging Infectious<br>Diseases - Health<br>Science Centre 3.<br>Department of<br>Disease Control,<br>Ministry of Public<br>Health, Thailand | Pilailuk,Okada; Siripaporn,Phuygun;<br>Thanutsapa,Thanadachakul;<br>Supaporn,Wacharapluesadee;<br>Sittiporn,Parnten; Warawan,Wongboot;<br>Sunthareeya,Waicharoen; Rome,Buathong;<br>Malinee,Chittaganpitch; Nanthawan,Mekha                                                                                                                                                                                                    |
| EPI_ISL_<br>403963 | hCoV-19/Thail<br>and/74/2020           | Asia /<br>Thailand /<br>Nonthaburi                                    | 2020-01-13 | Bamrasnaradura<br>Hospital                                                                                               | 1. Department of<br>Medical Sciences,<br>Ministry of Public<br>Health, Thailand 2.<br>Thai Red Cross<br>Emerging Infectious<br>Diseases - Health<br>Science Centre 3.<br>Department of<br>Disease Control,<br>Ministry of Public<br>Health, Thailand | Pilailuk,Okada; Siripaporn,Phuygun;<br>Thanutsapa,Thanadachakul;<br>Supaporn,Wacharapluesadee;<br>Sittiporn,Parnten; Warawan,Wongboot;<br>Sunthareeya,Waicharoen; Rome,Buathong;<br>Malinee,Chittaganpitch; Nanthawan,Mekha                                                                                                                                                                                                    |
| EPI_ISL_<br>404227 | hCoV-19/Zheji<br>ang/WZ-01/20<br>20    | Asia / China<br>/<br>Zhejiang                                         | 2020-01-16 | Zhejiang<br>Provincial Center<br>for Disease<br>Control and<br>Prevention                                                | Department of<br>Microbiology, Zhejiang<br>Provincial Center for<br>Disease Control and<br>Prevention                                                                                                                                                | Yin Chen, Yanjun Zhang, Haiyan Mao, Junhang<br>Pan, Xiuyu Lou, Yiyu Lu, Juying Yan, Hanping Zhu,<br>Jian Gao, Yan Feng, Yi Sun, Hao Yan, Zhen Li,<br>Yisheng Sun, Liming Gong, Qiong Ge, Wen Shi,<br>Xinying Wang, Wenwu Yao, Zhangnv Yang, Fang<br>Xu, Chen Chen, Enfu Chen, Zhen Wang, Zhiping<br>Chen, Jianmin Jiang, Chonggao Hu                                                                                           |
| EPI_ISL_<br>404228 | hCoV-19/Zheji<br>ang/WZ-02/20<br>20    | Asia / China<br>/<br>Zhejiang                                         | 2020-01-17 | Zhejiang<br>Provincial Center<br>for Disease<br>Control and<br>Prevention                                                | Department of<br>Microbiology, Zhejiang<br>Provincial Center for<br>Disease Control and<br>Prevention                                                                                                                                                | Yanjun Zhang, Yin Chen, Haiyan Mao, Junhang<br>Pan, Xiuyu Lou, Yiyu Lu, Juying Yan, Hanping Zhu,<br>Jian Gao, Yan Feng, Yi Sun, Hao Yan, Zhen Li,<br>Yisheng Sun, Liming Gong, Qiong Ge, Wen Shi,<br>Xinying Wang, Wenwu Yao, Zhangnv Yang, Fang<br>Xu, Chen Chen, Enfu Chen, Zhen Wang, Zhiping<br>Chen, Jianmin Jiang, Chonggao Hu                                                                                           |
| EPI_ISL_<br>404253 | hCoV-19/USA/I<br>L1/2020               | North<br>America /<br>USA / Illinois<br>/<br>Chicago                  | 2020-01-21 | IL Department of<br>Public Health<br>Chicago<br>Laboratory                                                               | Pathogen Discovery,<br>Respiratory Viruses<br>Branch, Division of<br>Viral Diseases, Centers<br>for Diseases Control<br>and Prevention                                                                                                               | Ying Tao, Krista Queen, Clinton R. Paden, Jing<br>Zhang, Yan Li, Anna Uehara, Xiaoyan Lu, Brian<br>Lynch, Senthil Kumar K. Sakthivel, Brett L.<br>Whitaker, Shifaq Kamili, Lijuan Wang, Janna' R.<br>Murray, Susan I. Gerber, Stephen Lindstrom,<br>Suxiang Tong                                                                                                                                                               |
| EPI_ISL_<br>404895 | hCoV-19/USA/<br>WA1/2020               | North<br>America /<br>USA /<br>Washington<br>/<br>Snohomish<br>County | 2020-01-19 | Providence<br>Regional Medical<br>Center                                                                                 | Division of Viral<br>Diseases, Centers for<br>Disease Control and<br>Prevention                                                                                                                                                                      | Queen,K., Tao,Y., Li,Y., Paden,C.R., Lu,X.,<br>Zhang,J., Gerber,S.I., Lindstrom,S., Tong,S.                                                                                                                                                                                                                                                                                                                                    |

|                |                                  |                                                  |            |                                                                                                     |                                                                                                                         |                                                                                                                                                                                                                                                                                                                                                                                                        |
|----------------|----------------------------------|--------------------------------------------------|------------|-----------------------------------------------------------------------------------------------------|-------------------------------------------------------------------------------------------------------------------------|--------------------------------------------------------------------------------------------------------------------------------------------------------------------------------------------------------------------------------------------------------------------------------------------------------------------------------------------------------------------------------------------------------|
| EPI_ISL_405839 | hCoV-19/Shenzhen/HKU-SZ-005/2020 | Asia / China / Guangdong / Shenzhen              | 2020-01-11 | The University of Hong Kong - Shenzhen Hospital                                                     | Li Ka Shing Faculty of Medicine, The University of Hong Kong                                                            | Chan,J.F.-W., Yuan,S., Kok,K.H., To,K.K.-W., Chu,H., Yang,J., Xing,F., Liu,J., Yip,C.C.-Y., Poon,R.W.-S., Tsai,H.W., Lo,S.K.-F., Chan,K.H., Poon,V.K.-M., Chan,W.M., Ip,J.D., Cai,J.P., Cheng,V.C.-C., Chen,H., Hui,C.K.-M. and Yuen,K.Y.                                                                                                                                                              |
| EPI_ISL_406031 | hCoV-19/Taiwan/2/2020            | Asia / Taiwan / Kaohsiung                        | 2020-01-23 | Centers for Disease Control, R.O.C. (Taiwan)                                                        | Centers for Disease Control, R.O.C. (Taiwan)                                                                            | Ji-Rong Yang, Yu-Chi Lin, Jung-Jung Mu, Ming-Tsan Liu, Shu-Ying Li                                                                                                                                                                                                                                                                                                                                     |
| EPI_ISL_406034 | hCoV-19/USA/CA1/2020             | North America / USA / California / Los Angeles   | 2020-01-23 | California Department of Public Health                                                              | Pathogen Discovery, Respiratory Viruses Branch, Division of Viral Diseases, Centers for Diseases Control and Prevention | Anna Uehara, Krista Queen, Ying Tao, Yan Li, Clinton R. Paden, Jing Zhang, Xiaoyan Lu, Brian Lynch, Senthil Kumar K. Sakthivel, Brett L. Whitaker, Shifaq Kamili, Lijuan Wang, Janna' R. Murray, Susan I. Gerber, Stephen Lindstrom, Suxiang Tong                                                                                                                                                      |
| EPI_ISL_406036 | hCoV-19/USA/CA2/2020             | North America / USA / California / Orange County | 2020-01-22 | California Department of Public Health                                                              | Pathogen Discovery, Respiratory Viruses Branch, Division of Viral Diseases, Centers for Diseases Control and Prevention | Anna Uehara, Krista Queen, Ying Tao, Yan Li, Clinton R. Paden, Jing Zhang, Xiaoyan Lu, Brian Lynch, Senthil Kumar K. Sakthivel, Brett L. Whitaker, Shifaq Kamili, Lijuan Wang, Janna' R. Murray, Susan I. Gerber, Stephen Lindstrom, Suxiang Tong                                                                                                                                                      |
| EPI_ISL_406223 | hCoV-19/USA/AZ1/2020             | North America / USA / Arizona / Phoenix          | 2020-01-22 | Arizona Department of Health Services                                                               | Pathogen Discovery, Respiratory Viruses Branch, Division of Viral Diseases, Centers for Disease Control and Prevention  | Ying Tao, Clinton R. Paden, Krista Queen, Anna Uehara, Yan Li, Jing Zhang, Xiaoyan Lu, Brian Lynch, Senthil Kumar K. Sakthivel, Brett L. Whitaker, Shifaq Kamili, Lijuan Wang, Janna' R. Murray, Susan I. Gerber, Stephen Lindstrom, Suxiang Tong                                                                                                                                                      |
| EPI_ISL_406531 | hCoV-19/Guangdong/20SF174/2020   | Asia / China / Guangdong / Zhuhai                | 2020-01-22 | Guangdong Provincial Center for Diseases Control and Prevention; Guangdong Provincial Public Health | Guangdong Provincial Center for Disease Control and Prevention                                                          | Min Kang, Jie Wu, Jing Lu, Tao Liu, Baisheng Li, Shujiang Mei, Feng Ruan, Lifeng Lin, Changwen Ke, Haojie Zhong, Yingtao Zhang, Lirong Zou, Xuguang Chen, Qi Zhu, Jianpeng Xiao, Jianxiang Geng, Zhe Liu, Jianxiang Hu, Weilin Zeng, Xing Li, Yuhuang Liao, Xiujuan Tang, Songjian Xiao, Ying Wang, Yingchao Song, Xue Zhuang, Lijun Liang, Guanhao He, Huihong Deng, Tie Song, Jianfeng He, Wenjun Ma |
| EPI_ISL_406533 | hCoV-19/Guangzhou/20SF206/2020   | Asia / China / Guangdong / Guangzhou             | 2020-01-22 | Guangdong Provincial Center for Diseases Control and Prevention; Guangdong Provincial Public Health | Guangdong Provincial Center for Diseases Control and Prevention                                                         | Min Kang, Jie Wu, Jing Lu, Tao Liu, Baisheng Li, Shujiang Mei, Feng Ruan, Lifeng Lin, Changwen Ke, Haojie Zhong, Yingtao Zhang, Lirong Zou, Xuguang Chen, Qi Zhu, Jianpeng Xiao, Jianxiang Geng, Zhe Liu, Jianxiang Hu, Weilin Zeng, Xing Li, Yuhuang Liao, Xiujuan Tang, Songjian Xiao, Ying Wang, Yingchao Song, Xue Zhuang, Lijun Liang, Guanhao He, Huihong Deng, Tie Song, Jianfeng He, Wenjun Ma |
| EPI_ISL_406534 | hCoV-19/Foshan/20SF207/2020      | Asia / China / Guangdong / Foshan                | 2020-01-22 | Guangdong Provincial Center for Diseases Control and Prevention; Guangdong Provincial Public Health | Guangdong Provincial Center for Diseases Control and Prevention                                                         | Min Kang, Jie Wu, Jing Lu, Tao Liu, Baisheng Li, Shujiang Mei, Feng Ruan, Lifeng Lin, Changwen Ke, Haojie Zhong, Yingtao Zhang, Lirong Zou, Xuguang Chen, Qi Zhu, Jianpeng Xiao, Jianxiang Geng, Zhe Liu, Jianxiang Hu, Weilin Zeng, Xing Li, Yuhuang Liao, Xiujuan Tang, Songjian Xiao, Ying Wang, Yingchao Song, Xue Zhuang, Lijun Liang, Guanhao He, Huihong Deng, Tie Song, Jianfeng He, Wenjun Ma |
| EPI_ISL_406535 | hCoV-19/Foshan/20SF210/2020      | Asia / China / Guangdong / Foshan                | 2020-01-22 | Guangdong Provincial Center for Diseases Control and Prevention; Guangdong Provincial Public Health | Guangdong Provincial Center for Diseases Control and Prevention                                                         | Min Kang, Jie Wu, Jing Lu, Tao Liu, Baisheng Li, Shujiang Mei, Feng Ruan, Lifeng Lin, Changwen Ke, Haojie Zhong, Yingtao Zhang, Lirong Zou, Xuguang Chen, Qi Zhu, Jianpeng Xiao, Jianxiang Geng, Zhe Liu, Jianxiang Hu, Weilin Zeng, Xing Li, Yuhuang Liao, Xiujuan Tang, Songjian Xiao, Ying Wang, Yingchao Song, Xue Zhuang, Lijun Liang, Guanhao He, Huihong Deng, Tie Song, Jianfeng He, Wenjun Ma |

|                |                                |                                         |            |                                                                                                                                              |                                                                                                                                                                               |                                                                                                                                                                                                                                                                                                                                                                                                        |
|----------------|--------------------------------|-----------------------------------------|------------|----------------------------------------------------------------------------------------------------------------------------------------------|-------------------------------------------------------------------------------------------------------------------------------------------------------------------------------|--------------------------------------------------------------------------------------------------------------------------------------------------------------------------------------------------------------------------------------------------------------------------------------------------------------------------------------------------------------------------------------------------------|
| EPI_ISL_406536 | hCoV-19/Foshan/20SF211/2020    | Asia / China / Guangdong / Foshan       | 2020-01-22 | Guangdong Provincial Center for Diseases Control and Prevention; Guangdong Provincial Public Health                                          | Guangdong Provincial Center for Diseases Control and Prevention                                                                                                               | Min Kang, Jie Wu, Jing Lu, Tao Liu, Baisheng Li, Shujiang Mei, Feng Ruan, Lifeng Lin, Changwen Ke, Haojie Zhong, Yingtao Zhang, Lirong Zou, Xuguang Chen, Qi Zhu, Jianpeng Xiao, Jianxiang Geng, Zhe Liu, Jianxiong Hu, Weilin Zeng, Xing Li, Yuhuang Liao, Xiujuan Tang, Songjian Xiao, Ying Wang, Yingchao Song, Xue Zhuang, Lijun Liang, Guanhao He, Huihong Deng, Tie Song, Jianfeng He, Wenjun Ma |
| EPI_ISL_406538 | hCoV-19/Guangdong/20SF201/2020 | Asia / China / Guangdong                | 2020-01-23 | Guangdong Provincial Center for Diseases Control and Prevention; Guangdong Provincial Institute of Public Health                             | Guangdong Provincial Center for Diseases Control and Prevention                                                                                                               | Min Kang, Jie Wu, Jing Lu, Tao Liu, Baisheng Li, Shujiang Mei, Feng Ruan, Lifeng Lin, Changwen Ke, Haojie Zhong, Yingtao Zhang, Lirong Zou, Xuguang Chen, Qi Zhu, Jianpeng Xiao, Jianxiang Geng, Zhe Liu, Jianxiong Hu, Weilin Zeng, Xing Li, Yuhuang Liao, Xiujuan Tang, Songjian Xiao, Ying Wang, Yingchao Song, Xue Zhuang, Lijun Liang, Guanhao He, Huihong Deng, Tie Song, Jianfeng He, Wenjun Ma |
| EPI_ISL_406593 | hCoV-19/Shenzhen/SZTH-002/2020 | Asia / China / Guangdong / Shenzhen     | 2020-01-13 | Shenzhen Key Laboratory of Pathogen and Immunity, National Clinical Research Center for Infectious Disease, Shenzhen Third People's Hospital | Shenzhen Key Laboratory of Pathogen and Immunity, National Clinical Research Center for Infectious Disease, Shenzhen Third People's Hospital                                  | Yang Yang, Chenguang Shen, Li Xing, Zhixiang Xu, Haixia Zheng, Yingxia Liu                                                                                                                                                                                                                                                                                                                             |
| EPI_ISL_406594 | hCoV-19/Shenzhen/SZTH-003/2020 | Asia / China / Guangdong / Shenzhen     | 2020-01-16 | Shenzhen Key Laboratory of Pathogen and Immunity, National Clinical Research Center for Infectious Disease, Shenzhen Third People's Hospital | Shenzhen Key Laboratory of Pathogen and Immunity, National Clinical Research Center for Infectious Disease, Shenzhen Third People's Hospital                                  | Yang Yang, Chenguang Shen, Li Xing, Zhixiang Xu, Haixia Zheng, Yingxia Liu                                                                                                                                                                                                                                                                                                                             |
| EPI_ISL_406596 | hCoV-19/France/IDF0372/2020    | Europe / France / Ile-de-France / Paris | 2020-01-23 | Department of Infectious and Tropical Diseases, Bichat Claude Bernard Hospital, Paris                                                        | National Reference Center for Viruses of Respiratory Infections, Institut Pasteur, Paris                                                                                      | Mélanie Albert, Marion Barbet, Sylvie Behillil, Méline Bizard, Angela Brisebarre, Flora Donati, Vincent Enouf, Maud Vanpeene, Sylvie van der Werf, Yazdan Yazdanpanah, Xavier Lescure.                                                                                                                                                                                                                 |
| EPI_ISL_406597 | hCoV-19/France/IDF0373/2020    | Europe / France / Ile-de-France / Paris | 2020-01-23 | Department of Infectious and Tropical Diseases, Bichat Claude Bernard Hospital, Paris                                                        | National Reference Center for Viruses of Respiratory Infections, Institut Pasteur, Paris                                                                                      | Mélanie Albert, Marion Barbet, Sylvie Behillil, Méline Bizard, Angela Brisebarre, Flora Donati, Vincent Enouf, Maud Vanpeene, Sylvie van der Werf, Yazdan Yazdanpanah, Xavier Lescure.                                                                                                                                                                                                                 |
| EPI_ISL_406716 | hCoV-19/Wuhan/WHU01/2020       | Asia / China / Hubei / Wuhan            | 2020-01-02 | unknown                                                                                                                                      | State Key Laboratory of Virology, Wuhan University                                                                                                                            | Chen,L., Liu,W., Zhang,Q., Xu,K., Ye,G., Wu,W., Sun,Z., Liu,F., Wu,K., Mei,Y., Zhang,W., Chen,Y., Li,Y., Shi,M., Lan,K. and Liu,Y.                                                                                                                                                                                                                                                                     |
| EPI_ISL_406717 | hCoV-19/Wuhan/WHU02/2020       | Asia / China / Hubei / Wuhan            | 2020-01-02 | unknown                                                                                                                                      | State Key Laboratory of Virology, Wuhan University                                                                                                                            | Chen,L., Liu,W., Zhang,Q., Xu,K., Ye,G., Wu,W., Sun,Z., Liu,F., Wu,K., Mei,Y., Zhang,W., Chen,Y., Li,Y., Shi,M., Lan,K. and Liu,Y.                                                                                                                                                                                                                                                                     |
| EPI_ISL_406798 | hCoV-19/Wuhan/WH01/2019        | Asia / China / Hubei / Wuhan            | 2019-12-26 | General Hospital of Central Theater Command of People's Liberation Army of China                                                             | BGI & Institute of Microbiology, Chinese Academy of Sciences & Shandong First Medical University & Shandong Academy of Medical Sciences & General Hospital of Central Theater | Weijun Chen, Yuhai Bi, Weifeng Shi and Zhenhong Hu                                                                                                                                                                                                                                                                                                                                                     |

|                |                              |                                          |            |                                                                                                                 |                                                                                                                                                                                                                            |                                                                                                                                                                       |
|----------------|------------------------------|------------------------------------------|------------|-----------------------------------------------------------------------------------------------------------------|----------------------------------------------------------------------------------------------------------------------------------------------------------------------------------------------------------------------------|-----------------------------------------------------------------------------------------------------------------------------------------------------------------------|
|                |                              |                                          |            |                                                                                                                 | Command of People's Liberation Army of China                                                                                                                                                                               |                                                                                                                                                                       |
| EPI_ISL_406800 | hCoV-19/Wuhan/WH03/2020      | Asia / China / Hubei / Wuhan             | 2020-01-01 | General Hospital of Central Theater Command of People's Liberation Army of China                                | BGI & Institute of Microbiology, Chinese Academy of Sciences & Shandong First Medical University & Shandong Academy of Medical Sciences & General Hospital of Central Theater Command of People's Liberation Army of China | Weijun Chen, Yuhai Bi, Weifeng Shi and Zhenhong Hu                                                                                                                    |
| EPI_ISL_406801 | hCoV-19/Wuhan/WH04/2020      | Asia / China / Hubei / Wuhan             | 2020-01-05 | General Hospital of Central Theater Command of People's Liberation Army of China                                | BGI & Institute of Microbiology, Chinese Academy of Sciences & Shandong First Medical University & Shandong Academy of Medical Sciences & General Hospital of Central Theater Command of People's Liberation Army of China | Weijun Chen, Yuhai Bi, Weifeng Shi and Zhenhong Hu                                                                                                                    |
| EPI_ISL_406844 | hCoV-19/Australia/VIC01/2020 | Oceania / Australia / Victoria / Clayton | 2020-01-25 | Monash Medical Centre                                                                                           | Collaboration between the University of Melbourne at The Peter Doherty Institute for Infection and Immunity, and the Victorian Infectious Disease Reference Laboratory                                                     | Caly,L., Seemann,T., Schultz,M., Druce,J. and Tairaoa,G                                                                                                               |
| EPI_ISL_406862 | hCoV-19/Germany/BavPat1/2020 | Europe / Germany / Bavaria / Munich      | 2020-01-28 | Charité Universitätsmedizin in Berlin, Institute of Virology; Institut für Mikrobiologie der Bundeswehr, Munich | Charité Universitätsmedizin Berlin, Institute of Virology                                                                                                                                                                  | Victor M Corman, Julia Schneider, Talitha Veith, Barbara Mühlemann, Markus Antwerpen, Christian Drosten, Roman Wölfel                                                 |
| EPI_ISL_406970 | hCoV-19/Hangzhou/HZ-1/2020   | Asia / China / Zhejiang / Hangzhou       | 2020-01-20 | Hangzhou Center for Disease and Control Microbiology Lab                                                        | Hangzhou Center for Disease and Control Microbiology Lab                                                                                                                                                                   | Yu Hua, Wang Haoqiu, Li Jun, Yu Xinfeng                                                                                                                               |
| EPI_ISL_406973 | hCoV-19/Singapore/1/2020     | Asia / Singapore                         | 2020-01-23 | Singapore General Hospital                                                                                      | National Public Health Laboratory                                                                                                                                                                                          | Mak, TM; Octavia S; Chavatte JM; Zhou, ZY; Cui, L; Lin, RTP                                                                                                           |
| EPI_ISL_407071 | hCoV-19/England/01/2020      | Europe / United Kingdom / England        | 2020-01-29 | Respiratory Virus Unit, Microbiology Services Colindale, Public Health England                                  | Respiratory Virus Unit, Microbiology Services Colindale, Public Health England                                                                                                                                             | Monica Galiano, Shahjahan Miah, Richard Myers, Angie Lackenby, Omolola Akinbami, Tiina Talts, Leena Bhaw, Kirstin Edwards, Jonathan Hubb, Joanna Ellis, Maria Zambon  |
| EPI_ISL_407073 | hCoV-19/England/02/2020      | Europe / United Kingdom / England        | 2020-01-29 | Respiratory Virus Unit, Microbiology Services Colindale, Public Health England                                  | Respiratory Virus Unit, Microbiology Services Colindale, Public Health England                                                                                                                                             | Monica Galiano, Shahjahan Miah, Richard Myers, Angie Lackenby, Omolola Akinbami, Tiina Talts, Leena Bhaw, Kirstin Edwards, Jonathan Hubb, Joanna Ellis, Maria Zambon. |



|                |                                 |                                                |            |                                                                                                                                       |                                                                                                                                       |                                                                                                                                                                                                                                                                                                                                                                                              |
|----------------|---------------------------------|------------------------------------------------|------------|---------------------------------------------------------------------------------------------------------------------------------------|---------------------------------------------------------------------------------------------------------------------------------------|----------------------------------------------------------------------------------------------------------------------------------------------------------------------------------------------------------------------------------------------------------------------------------------------------------------------------------------------------------------------------------------------|
| EPI_ISL_407079 | hCoV-19/Finland/1/2020          | Europe / Finland / Lapland                     | 2020-01-29 | Lapland Central Hospital                                                                                                              | Department of Virology, University of Helsinki and Helsinki University Hospital, Helsinki, Finland                                    | Teemu Smura, Suvi Kuivainen, Hannimari Kallio-Kokko, Olli Vapalahti                                                                                                                                                                                                                                                                                                                          |
| EPI_ISL_407084 | hCoV-19/Japan/AI-I-004/2020     | Asia / Japan / Aichi                           | 2020-01-25 | Department of Virology III, National Institute of Infectious Diseases                                                                 | Pathogen Genomics Center, National Institute of Infectious Diseases                                                                   | Tsuyoshi Sekizuka, Shutoku Matsuyama, Naganori Nao, Kazuya Shirato, Shinji Watanabe, Makoto Takeda, Makoto Kuroda                                                                                                                                                                                                                                                                            |
| EPI_ISL_407193 | hCoV-19/South Korea/KCDC03/2020 | Asia / South Korea / Gyeonggi-do               | 2020-01-25 | Korea Centers for Disease Control & Prevention (KCDC) Center for Laboratory Control of Infectious Diseases Division of Viral Diseases | Korea Centers for Disease Control & Prevention (KCDC) Center for Laboratory Control of Infectious Diseases Division of Viral Diseases | Jeong-Min Kim, Yoon-Seok Chung, Namjoo Lee, Mi-Seon Kim, SangHee Woo, Hye-Joon Jo, Sehee Park, Heui Man Kim, Myung Guk Han                                                                                                                                                                                                                                                                   |
| EPI_ISL_407313 | hCoV-19/Hangzhou/HZCDC001/2020  | Asia / China / Zhejiang / Hangzhou             | 2020-01-19 | Hangzhou Center for Disease Control and Prevention                                                                                    | Hangzhou Center for Disease Control and Prevention                                                                                    | Jun Li, Haoqiu Wang, Hua Yu, Lingfeng Mao, Xinfen Yu, Zhou Sun, Qingxin Kong, Xin Qian, Shuchang Chen, Xuchu Wang                                                                                                                                                                                                                                                                            |
| EPI_ISL_407893 | hCoV-19/Australia/NSW01/2020    | Oceania / Australia / New South Wales / Sydney | 2020-01-24 | Centre for Infectious Diseases and Microbiology Laboratory Services                                                                   | NSW Health Pathology - Institute of Clinical Pathology and Medical Research; Westmead Hospital; University of Sydney                  | Eden J-S, Carter I, Rahman H, Holmes EC, Rockett R, O'Sullivan MV, Sintchenko V, Chen SC, Maddocks S, Kok J and Dwyer DE for the 2019-nCoV Study Group                                                                                                                                                                                                                                       |
| EPI_ISL_407894 | hCoV-19/Australia/QLD01/2020    | Oceania / Australia / Queensland / Gold Coast  | 2020-01-28 | Pathology Queensland                                                                                                                  | Public Health Virology Laboratory                                                                                                     | Ben Huang, Alyssa Pyke, Amanda De Jong, Andrew Van Den Hurk, Carmel Taylor, David Warrilow, Doris Genge, Elisabeth Gamez, Glen Hewitson, Ian Maxwell Mackay, Inga Sultana, Jamie McMahon, Jean Barcelon, Judy Northill, Mitchell Finger, Natalie Simpson, Neelima Nair, Peter Burtonclay, Peter Moore, Sarah Wheatley, Sean Moody, Sonja Hall-Mendelin, Timothy Gardam, and Frederick Moore. |
| EPI_ISL_407896 | hCoV-19/Australia/QLD02/2020    | Oceania / Australia / Queensland / Gold Coast  | 2020-01-30 | Pathology Queensland                                                                                                                  | Public Health Virology Laboratory                                                                                                     | Ben Huang, Alyssa Pyke, Amanda De Jong, Andrew Van Den Hurk, Carmel Taylor, David Warrilow, Doris Genge, Elisabeth Gamez, Glen Hewitson, Ian Maxwell Mackay, Inga Sultana, Jamie McMahon, Jean Barcelon, Judy Northill, Mitchell Finger, Natalie Simpson, Neelima Nair, Peter Burtonclay, Peter Moore, Sarah Wheatley, Sean Moody, Sonja Hall-Mendelin, Timothy Gardam, and Frederick Moore. |
| EPI_ISL_407976 | hCoV-19/Belgium/GHB-03021/2020  | Europe / Belgium / Leuven                      | 2020-02-03 | KU Leuven, Clinical and Epidemiological Virology                                                                                      | KU Leuven, Clinical and Epidemiological Virology                                                                                      | Bert Vanmechelen, Elke Wollants, Annabel Rector, Els Keyaerts, Lies Laenen, Marc Van Ranst, and Piet Maes                                                                                                                                                                                                                                                                                    |
| EPI_ISL_407987 | hCoV-19/Singapore/2/2020        | Asia / Singapore                               | 2020-01-25 | Singapore General Hospital                                                                                                            | Programme in Emerging Infectious Diseases, Duke-NUS Medical School                                                                    | Danielle E Anderson, Martin Linster, Yan Zhuang, Jayanthi Jayakumar, Kian Sing Chan, Lynette LE Oon, Jenny GH Low, Yvonne CF Su, Linfa Wang, Gavin JD Smith                                                                                                                                                                                                                                  |
| EPI_ISL_407988 | hCoV-19/Singapore/3/2020        | Asia / Singapore                               | 2020-02-01 | National Centre for Infectious Diseases                                                                                               | Programme in Emerging Infectious Diseases, Duke-NUS Medical School                                                                    | Danielle E Anderson, Martin Linster, Yan Zhuang, Jayanthi Jayakumar, David CB Lye, Yee Sin Leo, Barnaby E Young, Yvonne CF Su, Linfa Wang, Gavin JD Smith                                                                                                                                                                                                                                    |
| EPI_ISL_408008 | hCoV-19/USA/CA3/2020            | North America / USA / California               | 2020-01-29 | California Department of Health                                                                                                       | Pathogen Discovery, Respiratory Viruses Branch, Division of Viral Diseases, Centers                                                   | Krista Queen, Jing Zhang, Yan Li, Ying Tao, Anna Uehara, Clinton Paden, Xiaoyan Lu, Brian Lynch, Senthil Kumar K. Sakthivel, Brett L. Whitaker, Shifaq Kamili, Lijuan Wang, Janna' R. Murray,                                                                                                                                                                                                |

|                |                                    |                                         |            |                                                                                          |                                                                                                                         |                                                                                                                                                                                                                                                                           |
|----------------|------------------------------------|-----------------------------------------|------------|------------------------------------------------------------------------------------------|-------------------------------------------------------------------------------------------------------------------------|---------------------------------------------------------------------------------------------------------------------------------------------------------------------------------------------------------------------------------------------------------------------------|
|                |                                    |                                         |            |                                                                                          | for Disease Control and Prevention                                                                                      | Susan I. Gerber, Stephen Lindstrom, Suxiang Tong                                                                                                                                                                                                                          |
| EPI_ISL_408009 | hCoV-19/USA/CA4/2020               | North America / USA / California        | 2020-01-29 | California Department of Health                                                          | Pathogen Discovery, Respiratory Viruses Branch, Division of Viral Diseases, Centers for Diseases Control and Prevention | Krista Queen, Jing Zhang, Yan Li, Ying Tao, Anna Uehara, Clinton Paden, Xiaoyan Lu, Brian Lynch, Senthil Kumar K. Sakthivel, Brett L. Whitaker, Shifaq Kamili, Lijuan Wang, Janna' R. Murray, Susan I. Gerber, Stephen Lindstrom, Suxiang Tong                            |
| EPI_ISL_408010 | hCoV-19/USA/CA5/2020               | North America / USA / California        | 2020-01-29 | California Department of Health                                                          | Pathogen Discovery, Respiratory Viruses Branch, Division of Viral Diseases, Centers for Diseases Control and Prevention | Ying Tao, Krista Queen, Jing Zhang, Yan Li, Anna Uehara, Clinton Paden, Xiaoyan Lu, Brian Lynch, Senthil Kumar K. Sakthivel, Brett L. Whitaker, Shifaq Kamili, Lijuan Wang, Janna' R. Murray, Susan I. Gerber, Stephen Lindstrom, Suxiang Tong                            |
| EPI_ISL_408430 | hCoV-19/France/IDF0515/2020        | Europe / France / Ile-de-France / Paris | 2020-01-29 | Department of Infectious and Tropical Diseases, Bichat Claude Bernard Hospital, Paris    | National Reference Center for Viruses of Respiratory Infections, Institut Pasteur, Paris                                | Mélanie Albert, Marion Barbet, Sylvie Behillil, Méline Bizard, Angela Brisebarre, Flora Donati, Vincent Enouf, Maud Vanpeene, Sylvie van der Werf, Yazdan Yazdanpanah, Xavier Lescure                                                                                     |
| EPI_ISL_408431 | hCoV-19/France/IDF0626/2020        | Europe / France / Ile-de-France / Paris | 2020-01-29 | Sorbonne Université, Inserm et Assistance Publique-Hôpitaux de Paris (Pitié Salpêtrière) | National Reference Center for Viruses of Respiratory Infections, Institut Pasteur, Paris                                | Mélanie Albert, Marion Barbet, Sylvie Behillil, Méline Bizard, Angela Brisebarre, Flora Donati, Vincent Enouf, Maud Vanpeene, Sylvie van der Werf, Sonia Burrel, Anne-Geneviève Marcelin, Vincent Calvez, David Boutolleau, Elise Klément, Valérie Pourcher, Eric Caumes. |
| EPI_ISL_408478 | hCoV-19/Chongqing/YC01/2020        | Asia / China / Chongqing / Yongchuan    | 2020-01-21 | Yongchuan District Center for Disease Control and Prevention                             | Chongqing Municipal Center for Disease Control and Prevention                                                           | Ye Sheng, Tang Yun, Ling Hua, Yu zhen, Chen Shuang, Tan ZhangPing, Su Kun, Li Qing, Tang Wenge, Rong Rong                                                                                                                                                                 |
| EPI_ISL_408479 | hCoV-19/Chongqing/ZX01/2020        | Asia / China / Chongqing / Zhongxian    | 2020-01-23 | Zhongxian Center for Disease Control and Prevention                                      | Chongqing Municipal Center for Disease Control and Prevention                                                           | Ye Sheng, Tang Yun, Ling Hua, Zhang Hong, Yu zhen, Chen Shuang, Tan ZhangPing, Su Kun, Li Qin, Tang Wenge, Rong Rong                                                                                                                                                      |
| EPI_ISL_408480 | hCoV-19/Yunnan/IVDC-YN-003/2020    | Asia / China / Yunnan / Kunming         | 2020-01-17 | National Institute for Viral Disease Control and Prevention, China CDC                   | National Institute for Viral Disease Control & Prevention, CCDC                                                         | Wenjie Tan, Xiaoqing Fu, Xiang Zhao, Wenling Wang, Peihua Niu, Roujian Lu, Yanhong Sun, Baoying Huang, Li Zhao, Fei Ye, Wenbo Xu, George F. Gao, Guizhen Wu                                                                                                               |
| EPI_ISL_408481 | hCoV-19/Chongqing/IVDC-CQ-001/2020 | Asia / China / Chongqing                | 2020-01-18 | National Institute for Viral Disease Control and Prevention, China CDC                   | National Institute for Viral Disease Control & Prevention, CCDC                                                         | Wenjie Tan, Hengqin Wang, Xiang Zhao, Wenling Wang, Peihua Niu, Roujian Lu, Sheng Ye, Baoying Huang, Li Zhao, Fei Ye, Wenbo Xu, George F. Gao, Guizhen Wu                                                                                                                 |
| EPI_ISL_408482 | hCoV-19/Shandong/IVDC-SD-001/2020  | Asia / China / Shandong / Qingdao       | 2020-01-19 | National Institute for Viral Disease Control and Prevention, China CDC                   | National Institute for Viral Disease Control & Prevention, CCDC                                                         | Wenjie Tan, Zhaoguo Wang, Xiang Zhao, Wenling Wang, Peihua Niu, Roujian Lu, Ti Liu, Baoying Huang, Li Zhao, Fei Ye, Wenbo Xu, George F. Gao, Guizhen Wu                                                                                                                   |
| EPI_ISL_408484 | hCoV-19/Sichuan/IVDC-SC-001/2020   | Asia / China / Sichuan / Chengdu        | 2020-01-15 | National Institute for Viral Disease Control and Prevention, China CDC                   | National Institute for Viral Disease Control & Prevention, CCDC                                                         | Wenjie Tan, Jianan Xu, Wenling Wang, Peihua Niu, Roujian Lu, Huiping Yang, Xiang Zhao, Baoying Huang, Li Zhao, Fei Ye, Wenbo Xu, George F. Gao, Guizhen Wu                                                                                                                |
| EPI_ISL_408486 | hCoV-19/Jiangxi/IVDC-JX-002/2020   | Asia / China / Jiangxi / Pingxiang      | 2020-01-11 | National Institute for Viral Disease Control and Prevention, China CDC                   | National Institute for Viral Disease Control & Prevention, CCDC                                                         | Wenjie Tan, Yong Shi, Wenling Wang, Peihua Niu, Roujian Lu, Jianxiang Li, Xiang Zhao, Baoying Huang, Li Zhao, Fei Ye, Wenbo Xu, George F. Gao, Guizhen Wu                                                                                                                 |
| EPI_ISL_408488 | hCoV-19/Jiangsu/IVDC-JS-001/2020   | Asia / China / Jiangsu / Huaian         | 2020-01-19 | National Institute for Viral Disease Control and                                         | National Institute for Viral Disease Control & Prevention, CCDC                                                         | Wenjie Tan, Shenjiao Wang, Wenling Wang, Peihua Niu, Roujian Lu, Kangchen Zhao, Xiang                                                                                                                                                                                     |

|                |                                      |                                                |            |                                                                                   |                                                                                                                         |                                                                                                                                                                                                                                                                                       |
|----------------|--------------------------------------|------------------------------------------------|------------|-----------------------------------------------------------------------------------|-------------------------------------------------------------------------------------------------------------------------|---------------------------------------------------------------------------------------------------------------------------------------------------------------------------------------------------------------------------------------------------------------------------------------|
|                |                                      |                                                |            | Prevention, China CDC                                                             |                                                                                                                         | Zhao, Baoying Huang, Li Zhao, Fei Ye, Wenbo Xu, George F. Gao, Guizhen Wu                                                                                                                                                                                                             |
| EPI_ISL_408489 | hCoV-19/Taiwan/NTU01/2020            | Asia / Taiwan / Taipei                         | 2020-01-31 | Department of Laboratory Medicine, National Taiwan University Hospital            | Microbial Genomics Core Lab, National Taiwan University Centers of Genomic and Precision Medicine                       | Shiou-Hwei Yeh, You-Yu Lin, Ya-Yun Lai, Chiao-Ling Li, Shan-Chwen Chang, Pei-Jer Chen, Sui-Yuan Chang                                                                                                                                                                                 |
| EPI_ISL_408514 | hCoV-19/env/Wuhan/IVDC-HBF13-20/2020 | Asia / China / Hubei / Wuhan                   | 2020-01-01 | Institute of Viral Disease Control and Prevention, China CDC                      | Institute of Viral Disease Control and Prevention, China CDC                                                            | William J. Liu, Peipei Liu, Xiang Zhao, Peihua Niu, Yingze Zhao, Wenwen Lei, Ziqian Xu, Shumei Zou, Wei Zhen, Beiwei Ye, Mengjie Yang, Weifeng Shi, Roujian Lu, Wenjie Tan, Zhixiao Chen, Yuchao Wu, Juan Song, Weimin Zhou, Dayan Wang, Jun Han, Wenbo Xu, George F. Gao, Guizhen Wu |
| EPI_ISL_408515 | hCoV-19/env/Wuhan/IVDC-HBF13-21/2020 | Asia / China / Hubei / Wuhan                   | 2020-01-01 | Institute of Viral Disease Control and Prevention, China CDC                      | Institute of Viral Disease Control and Prevention, China CDC                                                            | William J. Liu, Peipei Liu, Xiang Zhao, Peihua Niu, Yingze Zhao, Wenwen Lei, Ziqian Xu, Shumei Zou, Wei Zhen, Beiwei Ye, Mengjie Yang, Weifeng Shi, Roujian Lu, Wenjie Tan, Zhixiao Chen, Yuchao Wu, Juan Song, Weimin Zhou, Dayan Wang, Jun Han, Wenbo Xu, George F. Gao, Guizhen Wu |
| EPI_ISL_408665 | hCoV-19/Japan/TY-WK-012/2020         | Asia / Japan / Tokyo                           | 2020-01-29 | Dept. of Virology III, National Institute of Infectious Diseases                  | Pathogen Genomics Center, National Institute of Infectious Diseases                                                     | Tsuyoshi Sekizuka, Shutoku Matsuyama, Naganori Nao, Kazuya Shirato, Makoto Takeda, Makoto Kuroda                                                                                                                                                                                      |
| EPI_ISL_408666 | hCoV-19/Japan/TY-WK-501/2020         | Asia / Japan / Tokyo                           | 2020-01-31 | Dept. of Virology III, National Institute of Infectious Diseases                  | Pathogen Genomics Center, National Institute of Infectious Diseases                                                     | Tsuyoshi Sekizuka, Shutoku Matsuyama, Naganori Nao, Kazuya Shirato, Makoto Takeda, Makoto Kuroda                                                                                                                                                                                      |
| EPI_ISL_408667 | hCoV-19/Japan/TY-WK-521/2020         | Asia / Japan / Tokyo                           | 2020-01-31 | Dept. of Virology III, National Institute of Infectious Diseases                  | Pathogen Genomics Center, National Institute of Infectious Diseases                                                     | Tsuyoshi Sekizuka, Shutoku Matsuyama, Naganori Nao, Kazuya Shirato, Makoto Takeda, Makoto Kuroda                                                                                                                                                                                      |
| EPI_ISL_408668 | hCoV-19/Vietnam/VR03-38142/2020      | Asia / Vietnam / Thanh Hoa                     | 2020-01-24 | National Influenza Center - National Institute of Hygiene and Epidemiology (NIHE) | National Influenza Center - National Institute of Hygiene and Epidemiology (NIHE)                                       | Ung Thi Hong Trang, Hoang Vu Mai Phuong, Nguyen Le Khanh Hang, Nguyen Vu Son, Le Thi Thanh, Vuong Duc Cuong, Nguyen Phuong Anh, Pham Thi Hien, Tran Thu Huong, Le Thi Quynh Mai,                                                                                                      |
| EPI_ISL_408669 | hCoV-19/Japan/KY-V-029/2020          | Asia / Japan / Kyoto                           | 2020-01-29 | Dept. of Virology III, National Institute of Infectious Diseases                  | Pathogen Genomics Center, National Institute of Infectious Diseases                                                     | Tsuyoshi Sekizuka, Shutoku Matsuyama, Naganori Nao, Kazuya Shirato, Makoto Takeda, Makoto Kuroda                                                                                                                                                                                      |
| EPI_ISL_408670 | hCoV-19/USA/WI1/2020                 | North America / USA / Wisconsin                | 2020-01-31 | Wisconsin Department of Health Services                                           | Pathogen Discovery, Respiratory Viruses Branch, Division of Viral Diseases, Centers for Diseases Control and Prevention | Jing Zhang, Anna Uehara, Krista Queen, Yan Li, Ying Tao, Clinton R. Paden, Xiaoyan Lu, Brian Lynch, Senthil Kumar K. Sakthivel, Brett L. Whitaker, Shifaq Kamili, Lijuan Wang, Janna' R. Murray, Susan I. Gerber, Stephen Lindstrom, Suxiang Tong                                     |
| EPI_ISL_408976 | hCoV-19/Australia/NSW02/2020         | Oceania / Australia / New South Wales / Sydney | 2020-01-22 | Centre for Infectious Diseases and Microbiology Laboratory Services               | NSW Health Pathology - Institute of Clinical Pathology and Medical Research; Westmead Hospital; University of Sydney    | Rockett R, Sadsad R, Eden J-S, Carter I, Rahman H, Holmes EC, O'Sullivan MV, Sintchenko V, Chen SC, Maddocks S, Kok J and Dwyer DE for the 2019-nCoV Study Group*                                                                                                                     |
| EPI_ISL_408977 | hCoV-19/Australia/NSW03/2020         | Oceania / Australia / New South                | 2020-01-25 | Serology, Virology and OTDS Laboratories (SAVID), NSW                             | NSW Health Pathology - Institute of Clinical Pathology and Medical Research; Centre for                                 | Eden J-S, Carter I, Rahman H, Rawlinson W, Holmes EC, Rockett R, O'Sullivan MV, Sintchenko V, Chen SC, Maddocks S, Kok J and Dwyer DE for the 2019-nCoV Study Group*                                                                                                                  |

|                    |                               |                                                     |            |                                                                                               |                                                                                                                                        |                                                                                                                                                                                                                                                   |
|--------------------|-------------------------------|-----------------------------------------------------|------------|-----------------------------------------------------------------------------------------------|----------------------------------------------------------------------------------------------------------------------------------------|---------------------------------------------------------------------------------------------------------------------------------------------------------------------------------------------------------------------------------------------------|
|                    |                               | Wales /<br>Sydney                                   |            | Health Pathology<br>Randwick                                                                  | Infectious Diseases<br>and Microbiology<br>Laboratory Services;<br>Westmead Hospital;<br>University of Sydney                          |                                                                                                                                                                                                                                                   |
| EPI_ISL_<br>408978 | hCoV-19/Wuhan/WH05/2020       | Asia / China / Hubei /<br>Wuhan                     | 2020-02-07 | Wuhan Fourth<br>Hospital                                                                      | Beijing Genomics<br>Institute (BGI)                                                                                                    | Weijun Chen                                                                                                                                                                                                                                       |
| EPI_ISL_<br>409067 | hCoV-19/USA/MA1/2020          | North America /<br>USA /<br>Massachusetts           | 2020-01-29 | Massachusetts<br>Department of<br>Public Health                                               | Pathogen Discovery,<br>Respiratory Viruses<br>Branch, Division of<br>Viral Diseases, Centers<br>for Diseases Control<br>and Prevention | Clinton R. Paden, Jing Zhang, Krista Queen, Yan Li, Ying Tao, Anna Uehara, Xiaoyan Lu, Brian Lynch, Senthil Kumar K. Sakthivel, Brett L. Whitaker, Shifaq Kamili, Lijuan Wang, Janna' R. Murray, Susan I. Gerber, Stephen Lindstrom, Suxiang Tong |
| EPI_ISL_<br>410044 | hCoV-19/USA/CA6/2020          | North America /<br>USA /<br>California              | 2020-01-27 | California<br>Department of<br>Public Health                                                  | Pathogen Discovery,<br>Respiratory Viruses<br>Branch, Division of<br>Viral Diseases, Centers<br>for Diseases Control<br>and Prevention | Jing Zhang, Krista Queen, Yan Li, Ying Tao, Anna Uehara, Clinton R. Paden, Xiaoyan Lu, Brian Lynch, Senthil Kumar K. Sakthivel, Brett L. Whitaker, Shifaq Kamili, Lijuan Wang, Janna' R. Murray, Susan I. Gerber, Stephen Lindstrom, Suxiang Tong |
| EPI_ISL_<br>410045 | hCoV-19/USA/IL2/2020          | North America /<br>USA / Illinois                   | 2020-01-28 | IL Department of<br>Public Health<br>Chicago<br>Laboratory                                    | Pathogen Discovery,<br>Respiratory Viruses<br>Branch, Division of<br>Viral Diseases, Centers<br>for Diseases Control<br>and Prevention | Yan Li, Jing Zhang, Krista Queen, Ying Tao, Anna Uehara, Clinton R. Paden, Xiaoyan Lu, Brian Lynch, Senthil Kumar K. Sakthivel, Brett L. Whitaker, Shifaq Kamili, Lijuan Wang, Janna' R. Murray, Susan I. Gerber, Stephen Lindstrom, Suxiang Tong |
| EPI_ISL_<br>410218 | hCoV-19/Taiwan/NTU02/2020     | Asia /<br>Taiwan /<br>Taipei                        | 2020-02-05 | Department of<br>Laboratory<br>Medicine,<br>National Taiwan<br>University<br>Hospital         | Microbial Genomics<br>Core Lab, National<br>Taiwan University<br>Centers of Genomic<br>and Precision<br>Medicine                       | Shiou-Hwei Yeh, You-Yu Lin, Ya-Yun Lai, Chiao-Ling Li, Shan-Chwen Chang, Pei-Jer Chen, Sui-Yuan Chang                                                                                                                                             |
| EPI_ISL_<br>410301 | hCoV-19/Nepal/61/2020         | Asia / Nepal /<br>Kathmandu                         | 2020-01-13 | National Influenza<br>Centre, National<br>Public Health<br>Laboratory,<br>Kathmandu,<br>Nepal | The University of Hong<br>Kong                                                                                                         | Ranjit Sah, Runa Jha, Daniel Chu, Haogao Gu, Malik Peiris, Anup Bastola, Alfonso J. Rodriguez-Morales, Bibek Kumar Lal, Basu Dev Pandey, Leo Poon                                                                                                 |
| EPI_ISL_<br>410486 | hCoV-19/France/RA739/2020     | Europe /<br>France /<br>Rhône-Alpes /<br>Contamines | 2020-02-08 | CNR Virus des<br>Infections<br>Respiratoires -<br>France SUD                                  | CNR Virus des<br>Infections<br>Respiratoires -<br>France<br>SUD                                                                        | Bal, Antonin; Destras, Gregory; Gaymard, Alexandre; Bouscambert-Duchamp, Maude; Cheynet, Valérie; Brengel-Pesce, Karen; Morfin-Sherpa, Florence; Valette, Martine; Josset, Laurence; Lina, Bruno.                                                 |
| EPI_ISL_<br>410531 | hCoV-19/Japan/NA-20-05-1/2020 | Asia / Japan /<br>Nara                              | 2020-01-25 | Dept. of<br>Pathology,<br>National Institute<br>of Infectious<br>Diseases                     | Pathogen Genomics<br>Center, National<br>Institute of Infectious<br>Diseases                                                           | Tsuyoshi Sekizuka, Harutaka Katano, Shutoku Matsuyama, Naganori Nao, Kazuya Shirato, Motoi Suzuki, Hideki Hasegawa, Takaji Wakita, Makoto Takeda, Tadaki Suzuki, Makoto Kuroda                                                                    |
| EPI_ISL_<br>410532 | hCoV-19/Japan/OS-20-07-1/2020 | Asia / Japan /<br>Osaka                             | 2020-01-23 | Dept. of<br>Pathology,<br>National Institute<br>of Infectious<br>Diseases                     | Pathogen Genomics<br>Center, National<br>Institute of Infectious<br>Diseases                                                           | Tsuyoshi Sekizuka, Harutaka Katano, Shutoku Matsuyama, Naganori Nao, Kazuya Shirato, Motoi Suzuki, Hideki Hasegawa, Takaji Wakita, Makoto Takeda, Tadaki Suzuki, Makoto Kuroda                                                                    |
| EPI_ISL_<br>410535 | hCoV-19/Singapore/4/2020      | Asia /<br>Singapore                                 | 2020-02-03 | National Centre<br>for Infectious<br>Diseases                                                 | Programme in<br>Emerging Infectious<br>Diseases, Duke-NUS<br>Medical School                                                            | Danielle E Anderson, Martin Linster, Yan Zhuang, Jayanthi Jayakumar, David CB Lye, Yee Sin Leo, Barnaby E Young, Yvonne CF Su, Gavin JD Smith                                                                                                     |
| EPI_ISL_<br>410536 | hCoV-19/Singapore/5/2020      | Asia /<br>Singapore                                 | 2020-02-06 | Singapore General<br>Hospital,<br>Molecular<br>Laboratory,                                    | Programme in<br>Emerging Infectious<br>Diseases, Duke-NUS<br>Medical School                                                            | Danielle E Anderson, Martin Linster, Yan Zhuang, Jayanthi Jayakumar, Kian Sing Chan, Lynette LE Oon, Shirin Kalimuddin, Jenny GH Low, Yvonne CF Su, Gavin JD Smith                                                                                |

|                |                              |                                               |            |                                                                            |                                                                                  |                                                                                                                                                                                                                                                                                                                                                                                              |
|----------------|------------------------------|-----------------------------------------------|------------|----------------------------------------------------------------------------|----------------------------------------------------------------------------------|----------------------------------------------------------------------------------------------------------------------------------------------------------------------------------------------------------------------------------------------------------------------------------------------------------------------------------------------------------------------------------------------|
|                |                              |                                               |            | Division of Pathology                                                      |                                                                                  |                                                                                                                                                                                                                                                                                                                                                                                              |
| EPI_ISL_410537 | hCoV-19/Singapore/6/2020     | Asia / Singapore                              | 2020-02-09 | Singapore General Hospital, Molecular Laboratory, Division of Pathology    | Programme in Emerging Infectious Diseases, Duke-NUS Medical School               | Danielle E Anderson, Martin Linster, Yan Zhuang, Jayanthi Jayakumar, Kian Sing Chan, Lynette LE Oon, Shirin Kalimuddin, Jenny GH Low, Yvonne CF Su, Gavin JD Smith                                                                                                                                                                                                                           |
| EPI_ISL_410545 | hCoV-19/Italy/INMI1-isl/2020 | Europe / Italy / Rome                         | 2020-01-29 | INMI Lazzaro Spallanzani IRCCS                                             | Laboratory of Virology, INMI Lazzaro Spallanzani IRCCS                           | Maria R. Capobianchi, Cesare E. M. Gruber, Martina Rueca, Barbara Bartolini, Francesco Messina, Emanuela Giombini, Francesca Colavita, Concetta Castilletti, Eleonora Lalle, Fabrizio Carletti, Emanuele Nicastrì, Giuseppe Ippolito.                                                                                                                                                        |
| EPI_ISL_410713 | hCoV-19/Singapore/7/2020     | Asia / Singapore                              | 2020-01-27 | National Public Health Laboratory, National Centre for Infectious Diseases | National Public Health Laboratory, National Centre for Infectious Diseases       | Octavia S, Mak TM, Cui L, Lin RTP                                                                                                                                                                                                                                                                                                                                                            |
| EPI_ISL_410714 | hCoV-19/Singapore/8/2020     | Asia / Singapore                              | 2020-02-03 | National Public Health Laboratory, National Centre for Infectious Diseases | National Public Health Laboratory, National Centre for Infectious Diseases       | Octavia S, Mak TM, Cui L, Lin RTP                                                                                                                                                                                                                                                                                                                                                            |
| EPI_ISL_410715 | hCoV-19/Singapore/9/2020     | Asia / Singapore                              | 2020-02-04 | National Public Health Laboratory, National Centre for Infectious Diseases | National Public Health Laboratory, National Centre for Infectious Diseases       | Octavia S, Mak TM, Cui L, Lin RTP                                                                                                                                                                                                                                                                                                                                                            |
| EPI_ISL_410716 | hCoV-19/Singapore/10/2020    | Asia / Singapore                              | 2020-02-04 | National Public Health Laboratory, National Centre for Infectious Diseases | National Centre for Infectious Diseases, National Centre for Infectious Diseases | Octavia S, Mak TM, Cui L, Lin RTP                                                                                                                                                                                                                                                                                                                                                            |
| EPI_ISL_410717 | hCoV-19/Australia/QLD03/2020 | Oceania / Australia / Queensland / Gold Coast | 2020-02-05 | Pathology Queensland                                                       | Public Health Virology Laboratory                                                | Ben Huang, Alyssa Pyke, Amanda De Jong, Andrew Van Den Hurk, Carmel Taylor, David Warrilow, Doris Genge, Elisabeth Gamez, Glen Hewitson, Ian Maxwell Mackay, Inga Sultana, Jamie McMahon, Jean Barcelon, Judy Northill, Mitchell Finger, Natalie Simpson, Neelima Nair, Peter Burtonclay, Peter Moore, Sarah Wheatley, Sean Moody, Sonja Hall-Mendelin, Timothy Gardam, and Frederick Moore. |
| EPI_ISL_410718 | hCoV-19/Australia/QLD04/2020 | Oceania / Australia / Queensland / Gold Coast | 2020-02-05 | Pathology Queensland                                                       | Public Health Virology Laboratory                                                | Ben Huang, Alyssa Pyke, Amanda De Jong, Andrew Van Den Hurk, Carmel Taylor, David Warrilow, Doris Genge, Elisabeth Gamez, Glen Hewitson, Ian Maxwell Mackay, Inga Sultana, Jamie McMahon, Jean Barcelon, Judy Northill, Mitchell Finger, Natalie Simpson, Neelima Nair, Peter Burtonclay, Peter Moore, Sarah Wheatley, Sean Moody, Sonja Hall-Mendelin, Timothy Gardam, and Frederick Moore. |
| EPI_ISL_410719 | hCoV-19/Singapore/11/2020    | Asia / Singapore                              | 2020-02-02 | National Public Health Laboratory                                          | National Public Health Laboratory                                                | Octavia S, Mak TM, Cui L, Lin RTP                                                                                                                                                                                                                                                                                                                                                            |
| EPI_ISL_411060 | hCoV-19/Fujian/8/2020        | Asia / China / Fujian                         | 2020-01-21 | Fujian Center for Disease Control and Prevention                           | Fujian Center for Disease Control and Prevention                                 | Chen Wei, Zhang Yanhua, He Wenxiang, Weng Yuwei                                                                                                                                                                                                                                                                                                                                              |

|                |                                   |                                         |            |                                                                                             |                                                                                                                                                                                                                                                  |                                                                                                                                                                                                                                                                |
|----------------|-----------------------------------|-----------------------------------------|------------|---------------------------------------------------------------------------------------------|--------------------------------------------------------------------------------------------------------------------------------------------------------------------------------------------------------------------------------------------------|----------------------------------------------------------------------------------------------------------------------------------------------------------------------------------------------------------------------------------------------------------------|
| EPI_ISL_411066 | hCoV-19/Fujian/13/2020            | Asia / China / Fujian                   | 2020-01-22 | Fujian Center for Disease Control and Prevention                                            | Fujian Center for Disease Control and Prevention                                                                                                                                                                                                 | Chen Wei, Zhang Yanhua, He Wenxiang, Weng Yuwei                                                                                                                                                                                                                |
| EPI_ISL_411218 | hCoV-19/France/IDF0571/2020       | Europe / France / Ile-de-France / Paris | 2020-02-02 | Department of Infectious and Tropical Diseases, Bichat Claude Bernard Hospital, Paris       | Laboratoire Virpath, CIRI U111, UCBL1, INSERM, CNRS, ENS Lyon                                                                                                                                                                                    | Olivier Terrier, Aurélien Traversier, Julien Fouret, Yazdan Yazdanpanah, Xavier Lescure, Catherine Legras-Lachuer, Alexandre Gaymard, Bruno Lina, Manuel Rosa-Calatrava                                                                                        |
| EPI_ISL_411219 | hCoV-19/France/IDF0386-isIP1/2020 | Europe / France / Ile-de-France / Paris | 2020-01-28 | Department of Infectious and Tropical Diseases, Bichat Claude Bernard Hospital, Paris       | Laboratoire Virpath, CIRI U111, UCBL1, INSERM, CNRS, ENS Lyon                                                                                                                                                                                    | Olivier Terrier, Aurélien Traversier, Julien Fouret, Yazdan Yazdanpanah, Xavier Lescure, Alexandre Gaymard, Bruno Lina, Manuel Rosa-Calatrava                                                                                                                  |
| EPI_ISL_411902 | hCoV-19/Cambodia/0012/2020        | Asia / Cambodia / Sihanoukville         | 2020-01-27 | Virology Unit, Institut Pasteur du Cambodge.                                                | Virology Unit, Institut Pasteur du Cambodge (Sequencing done by: Jessica E Manning/Jennifer A Bohl at Malaria and Vector Research Laboratory, National Institute of Allergy and Infectious Diseases and Vida Ahyong from Chan-Zuckerberg Biohub) | Erik A Karlsson, Jennifer A Bohl, Vida Ahyong, Veasna Duong, Philippe Dussart, Jessica E Manning.                                                                                                                                                              |
| EPI_ISL_411950 | hCoV-19/Jiangsu/JS01/2020         | Asia / China / Jiangsu                  | 2020-01-23 | NHC Key laboratory of Enteric Pathogenic Microbiology, Institute of Pathogenic Microbiology | Jiangsu Provincial Center for Disease Control & Prevention                                                                                                                                                                                       | Lunbiao Cui, Kangchen Zhao, Xiaojuan Zhu, Yiyue Ge, Tao Wu, Bin Wu, Yin Chen, Fengcai Zhu, Baoli Zhu, Ming Wu                                                                                                                                                  |
| EPI_ISL_411951 | hCoV-19/Sweden/01/2020            | Europe / Sweden                         | 2020-02-07 | unknown                                                                                     | Unit for Laboratory Development and Technology Transfer, Public Health Agency of Sweden                                                                                                                                                          | Bengner, M., Palmerus, M., Lindsjo, O., Lind Karlberg, M., Monteil, V., Appelberg, S., Brave, A., Muradrasoli, S. and Tegmark-Wisell, K.                                                                                                                       |
| EPI_ISL_411952 | hCoV-19/Jiangsu/JS02/2020         | Asia / China / Jiangsu                  | 2020-01-24 | NHC Key laboratory of Enteric Pathogenic Microbiology, Institute of Pathogenic Microbiology | Jiangsu Provincial Center for Disease Control & Prevention                                                                                                                                                                                       | Kangchen Zhao, Xiaojuan Zhu, Lunbiao Cui, Tao Wu, Yiyue Ge, Bin Wu, Yin Chen, Fengcai Zhu, Baoli Zhu, Ming Wu                                                                                                                                                  |
| EPI_ISL_411953 | hCoV-19/Jiangsu/JS03/2020         | Asia / China / Jiangsu                  | 2020-01-24 | NHC Key laboratory of Enteric Pathogenic Microbiology, Institute of Pathogenic Microbiology | Jiangsu Provincial Center for Disease Control & Prevention                                                                                                                                                                                       | Kangchen Zhao, Xiaojuan Zhu, Lunbiao Cui, Tao Wu, Yiyue Ge, Bin Wu, Yin Chen, Fengcai Zhu, Baoli Zhu, Ming Wu                                                                                                                                                  |
| EPI_ISL_411954 | hCoV-19/USA/CA7/2020              | North America / USA / California        | 2020-02-06 | California Department of Public Health                                                      | Pathogen Discovery, Respiratory Viruses Branch, Division of Viral Diseases, Centers for Diseases Control and Prevention                                                                                                                          | Krista Queen, Anna Uehara, Jing Zhang, Yan Li, Ying Tao, Clinton R. Paden, Haibin Wang, Shifaq Kamili, Xiaoyan Lu, Brian Lynch, Senthil Kumar K. Sakthivel, Brett L. Whitaker, Lijuan Wang, Janna' R. Murray, Susan I. Gerber, Stephen Lindstrom, Suxiang Tong |

|                |                                   |                                           |            |                                                                                                                                     |                                                                                                                                     |                                                                                                                                                                                                                                                                                             |
|----------------|-----------------------------------|-------------------------------------------|------------|-------------------------------------------------------------------------------------------------------------------------------------|-------------------------------------------------------------------------------------------------------------------------------------|---------------------------------------------------------------------------------------------------------------------------------------------------------------------------------------------------------------------------------------------------------------------------------------------|
| EPI_ISL_411955 | hCoV-19/USA/CA8/2020              | North America / USA / California          | 2020-02-10 | California Department of Public Health                                                                                              | Pathogen Discovery, Respiratory Viruses Branch, Division of Viral Diseases, Centers for Diseases Control and Prevention             | Krista Queen, Anna Uehara, Jing Zhang, Yan Li, Ying Tao, Clinton R. Paden, Haibin Wang, Shifao Kamili, Xiaoyan Lu, Brian Lynch, Senthil Kumar K. Sakthivel, Brett L. Whitaker, Lijuan Wang, Janna' R. Murray, Susan I. Gerber, Stephen Lindstrom, Suxiang Tong                              |
| EPI_ISL_411956 | hCoV-19/USA/TX1/2020              | North America / USA / Texas               | 2020-02-11 | Texas Department of State Health Services                                                                                           | Pathogen Discovery, Respiratory Viruses Branch, Division of Viral Diseases, Centers for Diseases Control and Prevention             | Krista Queen, Anna Uehara, Jing Zhang, Yan Li, Ying Tao, Clinton R. Paden, Haibin Wang, Shifao Kamili, Xiaoyan Lu, Brian Lynch, Senthil Kumar K. Sakthivel, Brett L. Whitaker, Lijuan Wang, Janna' R. Murray, Susan I. Gerber, Stephen Lindstrom, Suxiang Tong                              |
| EPI_ISL_412026 | hCoV-19/Hefei/2/2020              | Asia / China / Anhui / Hefei              | 2020-02-23 | Second Hospital of Anhui Medical University                                                                                         | Second Hospital of Anhui Medical University                                                                                         | Changtai Wang, Zhongping Liua, Zixiang Chen, Xin Huang, Mengyuan Xua, Tengfei He, Mengji Lu, Zhenhua Zhang                                                                                                                                                                                  |
| EPI_ISL_412028 | hCoV-19/Hong Kong/VM20001061/2020 | Asia / Hong Kong                          | 2020-01-22 | Hong Kong Department of Health                                                                                                      | School of Public Health, The University of Hong Kong                                                                                | Dominic N.C. Tsang, Daniel K.W. Chu, Leo L.M. Poon, Malik Peiris                                                                                                                                                                                                                            |
| EPI_ISL_412029 | hCoV-19/Hong Kong/VB20024950/2020 | Asia / Hong Kong                          | 2020-01-30 | Hong Kong Department of Health                                                                                                      | The University of Hong Kong                                                                                                         | Dominic N.C. Tsang, Daniel K.W. Chu, Leo L.M. Poon, Malik Peiris                                                                                                                                                                                                                            |
| EPI_ISL_412030 | hCoV-19/Hong Kong/VB20026565/2020 | Asia / Hong Kong                          | 2020-02-01 | Hong Kong Department of Health                                                                                                      | School of Public Health, The University of Hong Kong                                                                                | Dominic N.C. Tsang, Daniel K.W. Chu, Leo L.M. Poon, Malik Peiris                                                                                                                                                                                                                            |
| EPI_ISL_412116 | hCoV-19/England/09c/2020          | Europe / United Kingdom / England         | 2020-02-09 | Respiratory Virus Unit, Microbiology Services Colindale, Public Health England                                                      | Respiratory Virus Unit, Microbiology Services Colindale, Public Health England                                                      | Monica Galiano, Shahjahan Miah, Angie Lackenby, Omolola Akinbami, Tiina Talts, Leena Bhaw, Richard Myers, Steven Platt, Kirstin Edwards, Jonathan Hubb, Joanna Ellis, Maria Zambon                                                                                                          |
| EPI_ISL_412459 | hCoV-19/Jingzhou/HBCDC-HB-01/2020 | Asia / China / Hubei / Jingzhou           | 2020-01-08 | Jingzhou Center for Disease Control and Prevention                                                                                  | Hubei Provincial Center for Disease Control and Prevention                                                                          | Bin Fang, Xiang Li, Xiao Yu, Linlin Liu, Bo Yang, Faxian Zhan, Guojun Ye, Xixiang Huo, Junqiang Xu, Bo Yu, Kun Cai, Jing Li, Maoyi Chen, Jie Hu, Chunlin Mao, Yongzhong Jiang.                                                                                                              |
| EPI_ISL_412862 | hCoV-19/USA/CA9/2020              | North America / USA / California / Solano | 2020-02-23 | California Department of Public Health                                                                                              | Pathogen Discovery, Respiratory Viruses Branch, Division of Viral Diseases, Centers for Disease Control and Prevention              | Krista Queen, Anna Uehara, Jing Zhang, Yan Li, Ying Tao, Clinton R. Paden, Haibin Wang, Shifao Kamili, Xiaoyan Lu, Brian Lynch, Senthil Kumar K. Sakthivel, Brett L. Whitaker, Lijuan Wang, Janna' R. Murray, Jasmine Padilla, Justin Lee, Susan I. Gerber, Stephen Lindstrom, Suxiang Tong |
| EPI_ISL_412869 | hCoV-19/South Korea/KCDC05/2020   | Asia / South Korea / Seoul                | 2020-01-30 | Division of Viral Diseases, Center for Laboratory Control of Infectious Diseases, Korea Centers for Diseases Control and Prevention | Division of Viral Diseases, Center for Laboratory Control of Infectious Diseases, Korea Centers for Diseases Control and Prevention | Jeong-Min Kim, Yoon-Seok Chung, Namjoo Lee, Mi-Seon Kim, Sang Hee Woo, Hye-Jun Jo, Sehee Park, Heui Man Kim, Myung Guk Han                                                                                                                                                                  |
| EPI_ISL_412870 | hCoV-19/South Korea/KCDC06/2020   | Asia / South Korea / Seoul                | 2020-01-30 | Division of Viral Diseases, Center for Laboratory Control of Infectious Diseases, Korea Centers for Diseases Control and Prevention | Division of Viral Diseases, Center for Laboratory Control of Infectious Diseases, Korea Centers for Diseases Control and Prevention | Jeong-Min Kim, Yoon-Seok Chung, Namjoo Lee, Mi-Seon Kim, Sang Hee Woo, Hye-Jun Jo, Sehee Park, Heui Man Kim, Myung Guk Han                                                                                                                                                                  |
| EPI_ISL_412871 | hCoV-19/South Korea/KCDC07/2020   | Asia / South Korea / Seoul                | 2020-01-31 | Division of Viral Diseases, Center for Laboratory Control of                                                                        | Division of Viral Diseases, Center for Laboratory Control of Infectious Diseases,                                                   | Jeong-Min Kim, Yoon-Seok Chung, Namjoo Lee, Mi-Seon Kim, Sang Hee Woo, Hye-Jun Jo, Sehee Park, Heui Man Kim, Myung Guk Han                                                                                                                                                                  |

|                |                                           |                                                |            |                                                                                                                                     |                                                                                                                                     |                                                                                                                                                                                                                                                                                                               |
|----------------|-------------------------------------------|------------------------------------------------|------------|-------------------------------------------------------------------------------------------------------------------------------------|-------------------------------------------------------------------------------------------------------------------------------------|---------------------------------------------------------------------------------------------------------------------------------------------------------------------------------------------------------------------------------------------------------------------------------------------------------------|
|                |                                           |                                                |            | Infectious Diseases, Korea Centers for Diseases Control and Prevention                                                              | Korea Centers for Diseases Control and Prevention                                                                                   |                                                                                                                                                                                                                                                                                                               |
| EPI_ISL_412872 | hCoV-19/South Korea/KCDC12/2020           | Asia / South Korea / Gyeonggi-do               | 2020-02-01 | Division of Viral Diseases, Center for Laboratory Control of Infectious Diseases, Korea Centers for Diseases Control and Prevention | Division of Viral Diseases, Center for Laboratory Control of Infectious Diseases, Korea Centers for Diseases Control and Prevention | Jeong-Min Kim, Yoon-Seok Chung, Namjoo Lee, Mi-Seon Kim, Sang Hee Woo, Hye-Jun Jo, Sehee Park, Heui Man Kim, Myung Guk Han                                                                                                                                                                                    |
| EPI_ISL_412873 | hCoV-19/South Korea/KCDC24/2020           | Asia / South Korea / Chungcheongnam-do         | 2020-02-06 | Division of Viral Diseases, Center for Laboratory Control of Infectious Diseases, Korea Centers for Diseases Control and Prevention | Division of Viral Diseases, Center for Laboratory Control of Infectious Diseases, Korea Centers for Diseases Control and Prevention | Jeong-Min Kim, Yoon-Seok Chung, Namjoo Lee, Mi-Seon Kim, Sang Hee Woo, Hye-Jun Jo, Sehee Park, Heui Man Kim, Myung Guk Han                                                                                                                                                                                    |
| EPI_ISL_412898 | hCoV-19/Wuhan/HBCDC-HB-02/2019            | Asia / China / Hubei / Wuhan                   | 2019-12-30 | Wuhan Jinyintan Hospital                                                                                                            | Hubei Provincial Center for Disease Control and Prevention                                                                          | Bin Fang, Xiang Li, Xiao Yu, Linlin Liu, Bo Yang, Faxian Zhan, Guojun Ye, Xixiang Huo, Junqiang Xu, Bo Yu, Kun Cai, Jing Li, Yongzhong Jiang.                                                                                                                                                                 |
| EPI_ISL_412899 | hCoV-19/Wuhan/HBCDC-HB-03/2019            | Asia / China / Hubei / Wuhan                   | 2019-12-30 | Wuhan Jinyintan Hospital                                                                                                            | Hubei Provincial Center for Disease Control and Prevention                                                                          | Bin Fang, Xiang Li, Xiao Yu, Linlin Liu, Bo Yang, Faxian Zhan, Guojun Ye, Xixiang Huo, Junqiang Xu, Bo Yu, Kun Cai, Jing Li, Yongzhong Jiang.                                                                                                                                                                 |
| EPI_ISL_412912 | hCoV-19/Germany/Baden-Wuerttemberg-1/2020 | Europe / Germany / Baden-Wuerttemberg          | 2020-02-25 | State Health Office Baden-Wuerttemberg                                                                                              | Charité Universitätsmedizin Berlin, Institute of Virology                                                                           | Victor M Corman, Julia Schneider, Barbara Mühlemann, Talitha Veith, Jörn Beheim-Schwarzbach, Terry Jones, Rainer Oehme, Silke Fischer, Christian Drosten                                                                                                                                                      |
| EPI_ISL_412964 | hCoV-19/Brazil/SPBR-01/2020               | South America / Brazil / Sao Paulo / Sao Paulo | 2020-02-25 | Hospital Israelita Albert Einstein                                                                                                  | Instituto Adolfo Lutz Interdisciplinary Procedures Center Strategic Laboratory                                                      | Jaqueline Goes de Jesus, Claudio Tavares Sacchi, Daniela Bernardes Borges da Silva, Ingra Moraes Claro, Flávia Cristina da Silva Sales, Claudia Regina Gonçalves, Joshua Quick, Maria do Carmo, Sampaio Tavares Timenetsky, Nicholas James Loman, Andrew Rambaut, Ester Cerdeira Sabino, Nuno Rodrigues Faria |
| EPI_ISL_412965 | hCoV-19/Canada/BC_37_0-2/2020             | North America / Canada / British Columbia      | 2020-02-16 | BCCDC Public Health Laboratory                                                                                                      | BCCDC Public Health Laboratory                                                                                                      | Harrigan, Prystajec, Krajden, Lee, Kamelian, Lapointe, Choi, Hoang, Sekirov, Levett, Tyson, Loman, Quick, Li, Gilmour                                                                                                                                                                                         |
| EPI_ISL_412966 | hCoV-19/China/IQTC01/2020                 | Asia / China / Guangdong / Guangzhou           | 2020-02-05 | unknown                                                                                                                             | Technology Centre, Guangzhou Customs                                                                                                | Shi,Y., Sun,J., Zheng,K., Huang,J. and Zhao,J.                                                                                                                                                                                                                                                                |
| EPI_ISL_412967 | hCoV-19/China/IQTC02/2020                 | Asia / China / Guangzhou                       | 2020-01-29 | unknown                                                                                                                             | Technology Centre, Guangzhou Customs                                                                                                | Shi,Y., Zheng,K., Sun,J., Huang,J., Zhu,A., Zhuang,Z., Dai,J., Chen,Z., Sun,F., Zhang,Z., Li,X. and Wang,Y.                                                                                                                                                                                                   |
| EPI_ISL_412968 | hCoV-19/Japan/Hu_DP_Kng_19-020/2020       | Asia / Japan                                   | 2020-02-10 | unknown                                                                                                                             | Takayuki Hishiki Kanagawa Prefectural Institute of Public Health, Department of Microbiology                                        | Hishiki,T., Suzuki,R., Sakuragi,J., Usui,K., Tanaka,Y., Kawai,J., Kogo,Y., Matsuki,Y., An,T., Hayashizaki,Y. and Takasaki,T.                                                                                                                                                                                  |



|                |                                     |                                                     |            |                                                                                         |                                                                                                                      |                                                                                                                                                                                                                                                                                                                                                                            |
|----------------|-------------------------------------|-----------------------------------------------------|------------|-----------------------------------------------------------------------------------------|----------------------------------------------------------------------------------------------------------------------|----------------------------------------------------------------------------------------------------------------------------------------------------------------------------------------------------------------------------------------------------------------------------------------------------------------------------------------------------------------------------|
| EPI_ISL_412969 | hCoV-19/Japan/Hu_DP_Kng_19-027/2020 | Asia / Japan                                        | 2020-02-10 | unknown                                                                                 | Takayuki Hishiki Kanagawa Prefectural Institute of Public Health, Department of Microbiology                         | Hishiki,T., Suzuki,R., Sakuragi,J., Usui,K., Tanaka,Y., Kawai,J., Kogo,Y., Matsuki,Y., An,T., Hayashizaki,Y. and Takasaki,T.                                                                                                                                                                                                                                               |
| EPI_ISL_412970 | hCoV-19/USA/WA2/2020                | North America / USA / Washington / Snohomish County | 2020-02-24 | Washington State Department of Health                                                   | Seattle Flu Study                                                                                                    | Helen Chu, Michael Boeckh, Janet Englund, Michael Famulare, Barry Lutz, Deborah Nickerson, Mark Rieder, Lea Starita, Matthew Thompson, Jay Shendure, and Trevor Bedford                                                                                                                                                                                                    |
| EPI_ISL_412971 | hCoV-19/Finland/FIN-25/2020         | Europe / Finland / Helsinki                         | 2020-02-25 | HUS Diagnostiikkakeskus, Hallinto                                                       | Department of Virology Faculty of Medicine, Medicum University of Helsinki                                           | Teemu Smura, Suvi Kuivanen, Hannimari Kallio-Kokko, Olli Vapalahti                                                                                                                                                                                                                                                                                                         |
| EPI_ISL_412972 | hCoV-19/Mexico/CDMX-InDRE_01/2020   | North America / Mexico / Mexico City                | 2020-02-27 | Instituto Nacional de Enfermedades Respiratorias                                        | Instituto de Diagnóstico y Referencia Epidemiológicos (INDRE)                                                        | Ramirez-Gonzalez Ernesto, Garces-Ayala Fabiola, Araiza-Rodriguez Adnan, Mendieta-Condado Edgar, Rodriguez-Maldonado Abril, Wong-Arambula Claudia, Vazquez-Perez Joel, Martinez Arturo, Boukadida Celia, Munoz-Medina Esteban, Sanchez Alejandro, Isa Pavel, Taboada Blanca, Lopez Susana, Arias Carlos, Barrera-Badillo Gisela, Hernandez-Rivas Lucia, Lopez-Martinez Irma |
| EPI_ISL_412973 | hCoV-19/Italy/CDG1/2020             | Europe / Italy / Lombardy                           | 2020-02-20 | Department of Infectious Diseases, Istituto Superiore di Sanità, Roma, Italy            | Virology Laboratory, Scientific Department, Army Medical Center                                                      | Paola Stefanelli, Stefano Fiore, Antonella Marchi, Eleonora Benedetti, Concetta Fabiani, Giovanni Faggioni, Antonella Fortunato, Riccardo De Santis, Silvia Fillo, Anna Anselmo, Andrea Ciannaruconi, Stefano Palomba, Florigio Lista                                                                                                                                      |
| EPI_ISL_412974 | hCoV-19/Italy/SPL1/2020             | Europe / Italy / Rome                               | 2020-01-29 | Department of Infectious Diseases, Istituto Superiore di Sanità, Rome, Italy            | Virology Laboratory, Scientific Department, Army Medical Center                                                      | Paola Stefanelli, Stefano Fiore, Antonella Marchi, Eleonora Benedetti, Concetta Fabiani, Giovanni Faggioni, Antonella Fortunato, Silvia Fillo, Riccardo De Santis, Andrea Ciannaruconi, Giancarlo Petralito, Filippo Molinari, Florigio Lista                                                                                                                              |
| EPI_ISL_412975 | hCoV-19/Australia/NSW05/2020        | Oceania / Australia / New South Wales / Sydney      | 2020-02-28 | Centre for Infectious Diseases and Microbiology Laboratory Services                     | NSW Health Pathology - Institute of Clinical Pathology and Medical Research; Westmead Hospital; University of Sydney | Eden J-S, Carter I, Rahman H, Holmes EC, Rockett R, O'Sullivan MV, Sintchenko V, Chen SC, Maddocks S, Kok J and Dwyer DE for the 2019-nCoV Study Group                                                                                                                                                                                                                     |
| EPI_ISL_412978 | hCoV-19/Wuhan/HBCDC-HB-02/2020      | Asia / China / Hubei / Wuhan                        | 2020-01-17 | The Central Hospital Of Wuhan                                                           | Hubei Provincial Center for Disease Control and Prevention                                                           | Bin Fang, Xiang Li, Xiao Yu, Linlin Liu, Bo Yang, Faxian Zhan, Guojun Ye, Xixiang Huo, Junqiang Xu, Bo Yu, Kun Cai, Jing Li, Yongzhong Jiang.                                                                                                                                                                                                                              |
| EPI_ISL_412979 | hCoV-19/Wuhan/HBCDC-HB-03/2020      | Asia / China / Hubei / Wuhan                        | 2020-01-18 | Union Hospital of Tongji Medical College, Huazhong University of Science and Technology | Hubei Provincial Center for Disease Control and Prevention                                                           | Bin Fang, Xiang Li, Xiao Yu, Linlin Liu, Bo Yang, Faxian Zhan, Guojun Ye, Xixiang Huo, Junqiang Xu, Bo Yu, Kun Cai, Jing Li, Yongzhong Jiang.                                                                                                                                                                                                                              |
| EPI_ISL_412980 | hCoV-19/Wuhan/HBCDC-HB-04/2020      | Asia / China / Hubei / Wuhan                        | 2020-01-18 | Union Hospital of Tongji Medical College, Huazhong University of Science and Technology | Hubei Provincial Center for Disease Control and Prevention                                                           | Bin Fang, Xiang Li, Xiao Yu, Linlin Liu, Bo Yang, Faxian Zhan, Guojun Ye, Xixiang Huo, Junqiang Xu, Bo Yu, Kun Cai, Jing Li, Yongzhong Jiang.                                                                                                                                                                                                                              |
| EPI_ISL_412981 | hCoV-19/Wuhan/HBCDC-HB-05/2020      | Asia / China / Hubei / Wuhan                        | 2020-01-18 | CR&WISCO GENERAL HOSPITAL                                                               | Hubei Provincial Center for Disease                                                                                  | Bin Fang, Xiang Li, Xiao Yu, Linlin Liu, Bo Yang, Faxian Zhan, Guojun Ye, Xixiang Huo, Junqiang Xu, Bo Yu, Kun Cai, Jing Li, Yongzhong Jiang.                                                                                                                                                                                                                              |

|                |                                     |                                                |            |                                                                                                 |                                                                                                 |                                                                                                                                                                                                                                                                                                                     |
|----------------|-------------------------------------|------------------------------------------------|------------|-------------------------------------------------------------------------------------------------|-------------------------------------------------------------------------------------------------|---------------------------------------------------------------------------------------------------------------------------------------------------------------------------------------------------------------------------------------------------------------------------------------------------------------------|
|                |                                     |                                                |            |                                                                                                 | Control and Prevention                                                                          |                                                                                                                                                                                                                                                                                                                     |
| EPI_ISL_412982 | hCoV-19/Wuhan/HBCDC-HB-06/2020      | Asia / China / Hubei / Wuhan                   | 2020-02-07 | Wuhan Lung Hospital                                                                             | Hubei Provincial Center for Disease Control and Prevention                                      | Bin Fang, Xiang Li, Xiao Yu, Linlin Liu, Bo Yang, Faxian Zhan, Guojun Ye, Xixiang Huo, Junqiang Xu, Bo Yu, Kun Cai, Jing Li, Yongzhong Jiang.                                                                                                                                                                       |
| EPI_ISL_412983 | hCoV-19/Tianmen/HBCDC-HB-07/2020    | Asia / China / Hubei / Tianmen                 | 2020-02-08 | Tianmen Center for Disease Control and Prevention                                               | Hubei Provincial Center for Disease Control and Prevention                                      | Bin Fang, Xiang Li, Xiao Yu, Linlin Liu, Bo Yang, Faxian Zhan, Guojun Ye, Xixiang Huo, Junqiang Xu, Bo Yu, Kun Cai, Jing Li, YiFa Zhu, Yangyang Tao, Xierong Li, Yongzhong Jiang.                                                                                                                                   |
| EPI_ISL_413014 | hCoV-19/Canada/ON-PHL2445/2020      | North America / Canada / Ontario               | 2020-01-25 | Public Health Ontario Laboratory                                                                | Ontario Agency for Health Protection and Promotion (OAHPP)                                      | Alireza Eshaghi, Samir N Patel, Jonathan B Gubbay, Vanessa G Allen, Christine Frantz, Aimin Li, Sandeep Nagra                                                                                                                                                                                                       |
| EPI_ISL_413015 | hCoV-19/Canada/ON-VIDO-01/2020      | North America / Canada / Ontario               | 2020-01-23 | Public Health Ontario Laboratory                                                                | National Microbiology Laboratory                                                                | Shari Tyson, Anna Majer, Erika Landry, Morag Graham, Grace Seo, Philip Mabon, Natalie Knox, Adrian Zetner, Samira Mubareka, Rob Kozak, Jocelyne Lew, Darryl Falzarano, Gerds Volker, Jonathan Gubbay, Stephanie Booth, Guillaume Poliquin, Tom Graefenhan, Matthew Gilmour, Nathalie Bastien, Yan Li, Timothy Booth |
| EPI_ISL_413016 | hCoV-19/Brazil/SPBR-02/2020         | South America / Brazil / Sao Paulo / Sao Paulo | 2020-02-28 | Hospital Israelita Albert Einstein                                                              | Instituto Adolfo Lutz, Interdisciplinary Procedures Center, Strategic Laboratory                | Jaqueline Goes de Jesus, Claudio Tavares Sacchi, Fabiana Cristina Pereira dos Santos, Ingra Morales Claro, Flávia Cristina da Silva Sales, Claudia Regina Gonçalves, Joshua Quick, Maria do Carmo Sampaio Tavares Timenetsky, Nicholas James Loman, Andrew Rambaut, Ester Cerdeira Sabino, Nuno Rodrigues Faria     |
| EPI_ISL_413017 | hCoV-19/South Korea/KUMCO1/2020     | Asia / South Korea                             | 2020-02-06 | Department of Microbiology, Institute for Viral Diseases, College of Medicine, Korea University | Department of Microbiology, Institute for Viral Diseases, College of Medicine, Korea University | Changmin Kang, Joon-Yong Bae, Jungmin Lee, Heedo Park, Juyoung Cho, Jeonghun Kim, Gee eun Lee, Cui Chunguang, Kyeong-ryeol Shin, Dong Min Kim, Jin Il Kim, Man-Seong Park                                                                                                                                           |
| EPI_ISL_413018 | hCoV-19/South Korea/KUMCO2/2020     | Asia / South Korea                             | 2020-02-06 | Department of Microbiology, Institute for Viral Diseases, College of Medicine, Korea University | Department of Microbiology, Institute for Viral Diseases, College of Medicine, Korea University | Changmin Kang, Joon-Yong Bae, Jungmin Lee, Heedo Park, Juyoung Cho, Jeonghun Kim, Gee eun Lee, Cui Chunguang, Kyeong-ryeol Shin, Dong Min Kim, Jin Il Kim, Man-Seong Park                                                                                                                                           |
| EPI_ISL_413019 | hCoV-19/Switzerland/1000477102/2020 | Europe / Switzerland / Zurich                  | 2020-02-26 | Department of Internal Medicine, Triemli Hospital                                               | Institute of Medical Virology, University of Zurich                                             | Stefan Schmutz, Maryam Zaheri, Verena Kufner, Patrick Redli, Fiona Steiner, Jon Huder, Riccarda Capaul, Andrea Zbinden, Jürg Böni, Michael Huber, Gerhard Eich, Alexandra Trkola                                                                                                                                    |
| EPI_ISL_413020 | hCoV-19/Switzerland/1000477377/2020 | Europe / Switzerland / Zurich                  | 2020-02-27 | Department of Internal Medicine, Triemli Hospital                                               | Institute of Medical Virology, University of Zurich                                             | Stefan Schmutz, Maryam Zaheri, Verena Kufner, Patrick Redli, Fiona Steiner, Jon Huder, Riccarda Capaul, Andrea Zbinden, Jürg Böni, Michael Huber, Gerhard Eich, Alexandra Trkola                                                                                                                                    |
| EPI_ISL_413021 | hCoV-19/Switzerland/1000477757/2020 | Europe / Switzerland / Zurich                  | 2020-02-29 | Klinik Hirslanden Zurich                                                                        | Institute of Medical Virology, University of Zurich                                             | Stefan Schmutz, Maryam Zaheri, Verena Kufner, Gabriela Ziltener, Patrick Redli, Fiona Steiner, Jon Huder, Riccarda Capaul, Andrea Zbinden, Jürg Böni, Michael Huber, Christian Ruef, Alexandra Trkola                                                                                                               |
| EPI_ISL_413022 | hCoV-19/Switzerland/1000477796/2020 | Europe / Switzerland / Zurich                  | 2020-02-29 | Division of Infectious Diseases, University Hospital Zurich                                     | Institute of Medical Virology, University of Zurich                                             | Stefan Schmutz, Maryam Zaheri, Verena Kufner, Gabriela Ziltener, Patrick Redli, Fiona Steiner, Jon Huder, Riccarda Capaul, Andrea Zbinden, Jürg Böni, Michael Huber, Roberto Speck, Alexandra Trkola                                                                                                                |
| EPI_ISL_413023 | hCoV-19/Switzerland/1000477797/2020 | Europe / Switzerland / Zurich                  | 2020-02-29 | Division of Infectious Diseases,                                                                | Institute of Medical Virology, University of Zurich                                             | Stefan Schmutz, Maryam Zaheri, Verena Kufner, Gabriela Ziltener, Patrick Redli, Fiona Steiner, Jon Huder, Riccarda Capaul, Andrea Zbinden, Jürg                                                                                                                                                                     |

|                |                                     |                                                |            |                                                                                                   |                                                                                                                      |                                                                                                                                                                                                                              |
|----------------|-------------------------------------|------------------------------------------------|------------|---------------------------------------------------------------------------------------------------|----------------------------------------------------------------------------------------------------------------------|------------------------------------------------------------------------------------------------------------------------------------------------------------------------------------------------------------------------------|
|                |                                     |                                                |            | University Hospital Zurich                                                                        |                                                                                                                      | Böni, Michael Huber, Roberto Speck, Alexandra Trkola                                                                                                                                                                         |
| EPI_ISL_413024 | hCoV-19/Switzerland/1000477806/2020 | Europe / Switzerland / Zurich                  | 2020-02-29 | Division of Infectious Diseases, University Hospital Zurich                                       | Institute of Medical Virology, University of Zurich                                                                  | Stefan Schmutz, Maryam Zaheri, Verena Kufner, Gabriela Ziltener, Patrick Redli, Fiona Steiner, Jon Huder, Riccarda Capaul, Andrea Zbinden, Jürg Böni, Michael Huber, Roberto Speck, Alexandra Trkola                         |
| EPI_ISL_413213 | hCoV-19/Australia/NSW06/2020        | Oceania / Australia / New South Wales / Sydney | 2020-02-29 | Centre for Infectious Diseases and Microbiology Laboratory Services                               | NSW Health Pathology - Institute of Clinical Pathology and Medical Research; Westmead Hospital; University of Sydney | Eden J-S, Carter I, Rahman H, Holmes EC, Rockett R, O'Sullivan MV, Sintchenko V, Chen SC, Maddocks S, Kok J and Dwyer DE for the 2019-nCoV Study Group*                                                                      |
| EPI_ISL_413214 | hCoV-19/Australia/NSW07/2020        | Oceania / Australia / New South Wales / Sydney | 2020-02-29 | Centre for Infectious Diseases and Microbiology Laboratory Services                               | NSW Health Pathology - Institute of Clinical Pathology and Medical Research; Westmead Hospital; University of Sydney | Eden J-S, Carter I, Rahman H, Holmes EC, Rockett R, O'Sullivan MV, Sintchenko V, Chen SC, Maddocks S, Kok J and Dwyer DE for the 2019-nCoV Study Group*                                                                      |
| EPI_ISL_413221 | hCoV-19/Scotland/CVR01/2020         | Europe / United Kingdom / Scotland             | 2020-03-02 | West of Scotland Specialist Virology Centre, NHSGCG                                               | MRC-University of Glasgow Centre for Virus Research                                                                  | Emma Thomson, Antonia Ho; James Shephard, Shirin Ashraf; Kathy Smollett, Daniel Mair, Stephen Carmichael, Ana da Silva Filipe; Richard Orton, Josh Singer, David L Robertson; Andrew Rambaut; Alasdair MacLean, Rory Gunson. |
| EPI_ISL_413455 | hCoV-19/USA/WA4-UW2/2020            | North America / USA / Washington               | 2020-02-28 | Washington State Public Health Lab                                                                | University of Washington Virology Lab                                                                                | Pavitra Roychoudhury, Arun Nalla, Hong Xie, Keith Jerome, Alexander Greninger                                                                                                                                                |
| EPI_ISL_413456 | hCoV-19/USA/WA-S2/2020              | North America / USA / Washington / King County | 2020-02-20 | Seattle Flu Study                                                                                 | Seattle Flu Study                                                                                                    | Chu et al                                                                                                                                                                                                                    |
| EPI_ISL_413457 | hCoV-19/USA/WA6-UW3/2020            | North America / USA / Washington               | 2020-02-29 | Washington State Public Health Lab                                                                | UW Virology Lab                                                                                                      | Pavitra Roychoudhury, Arun Nalla, Hong Xie, Keith Jerome, Alexander Greninger                                                                                                                                                |
| EPI_ISL_413458 | hCoV-19/USA/WA7-UW4/2020            | North America / USA / Washington               | 2020-03-01 | Washington State Public Health Lab                                                                | UW Virology Lab                                                                                                      | Pavitra Roychoudhury, Arun Nalla, Hong Xie, Keith Jerome, Alexander Greninger                                                                                                                                                |
| EPI_ISL_413485 | hCoV-19/Anhui/SZ005/2020            | Asia / China / Anhui / Suzhou                  | 2020-01-24 | Department of microbiology laboratory, Anhui Provincial Center for Disease Control and Prevention | Department of microbiology laboratory, Anhui Provincial Center for Disease Control and Prevention                    | Weiwei Li, Jun He, Yong Sun, Junling Yu, Qingqing Chen, Yuan Yuan, Yonglin Shi, Zhuhui Zhang, Yinglu Ge, Weidong Li, Bin Su, Zhirong Liu                                                                                     |
| EPI_ISL_413486 | hCoV-19/USA/WA8-UW5/2020            | North America / USA / Washington               | 2020-03-01 | Valley Medical Center                                                                             | University of Washington Virology Lab                                                                                | Pavitra Roychoudhury, Arun Nalla, Hong Xie, Keith Jerome, Alexander Greninger                                                                                                                                                |
| EPI_ISL_413487 | hCoV-19/USA/WA9-UW6/2020            | North America / USA / Washington               | 2020-03-01 | Harborview Medical Center                                                                         | University of Washington Virology Lab                                                                                | Pavitra Roychoudhury, Arun Nalla, Hong Xie, Keith Jerome, Alexander Greninger                                                                                                                                                |
| EPI_ISL_413488 | hCoV-19/Germany/NRW-01/2020         | Europe / Germany / North Rhine Westphalia /    | 2020-02-28 | Center of Medical Microbiology, Virology, and Hospital Hygiene,                                   | Center of Medical Microbiology, Virology, and Hospital Hygiene, University of Duesseldorf                            | Ortwin Adams, Marcel Andree, Alexander Dilthey, Torsten Feldt, Sandra Hauka, Torsten Houwaart, Björn-Erik Jensen, Detlef Kindgen-Milles, Malte Kohns Vasconcelos, Klaus Duesseldorf                                          |

|                |                              |                                                  |            |                                                                                                                                                                                                                     |                                                                                                                            |                                                                                                                                                                                       |
|----------------|------------------------------|--------------------------------------------------|------------|---------------------------------------------------------------------------------------------------------------------------------------------------------------------------------------------------------------------|----------------------------------------------------------------------------------------------------------------------------|---------------------------------------------------------------------------------------------------------------------------------------------------------------------------------------|
|                |                              | Heinsberg District                               |            | University of Duesseldorf                                                                                                                                                                                           |                                                                                                                            | Pfeffer, Tina Senff, Daniel Strelow, Jörg Timm, Andreas Walker, Tobias Wienemann                                                                                                      |
| EPI_ISL_413489 | hCoV-19/Italy/UniSR1/2020    | Europe / Italy / Lombardy / Milan                | 2020-03-03 | Laboratorio di Microbiologia e Virologia, Università Vita-Salute San Raffaele, Milano                                                                                                                               | Laboratorio di Microbiologia e Virologia, Università Vita-Salute San Raffaele, Milano                                      | R.A Diotti, E. Criscuolo, M. Castelli, V. Caputo, R. Ferrarese, M. Sampaolo, E. Boeri, I. Negri, V. Amato, G. Lo Raso, C. Di Resta, R. Burioni, M. Clementi, N. Mancini & N. Clementi |
| EPI_ISL_413490 | hCoV-19/New Zealand/01/2020  | Oceania / New Zealand / Auckland                 | 2020-02-27 | Auckland Hospital                                                                                                                                                                                                   | Institute of Environmental Science and Research (ESR)                                                                      | Matt Storey, Xiaoyun Ren, Gary McAuliffe, Sally Roberts, Matthew Blakiston, Erasmus Smit, Lauren Jelly, Joep de Ligt                                                                  |
| EPI_ISL_413519 | hCoV-19/Beijing/231/2020     | Asia / China / Beijing                           | 2020-01-28 | unknown                                                                                                                                                                                                             | Infectious Disease Control Center                                                                                          | Li,J., Li,L., Li,Z., Qiu,S., Song,H., Li,P. and Li,P.                                                                                                                                 |
| EPI_ISL_413520 | hCoV-19/Beijing/233/2020     | Asia / China / Beijing                           | 2020-01-28 | unknown                                                                                                                                                                                                             | Infectious Disease Control Center                                                                                          | Li,J., Li,L., Li,Z., Qiu,S., Song,H., Li,P. and Li,P.                                                                                                                                 |
| EPI_ISL_413521 | hCoV-19/Beijing/235/2020     | Asia / China / Beijing                           | 2020-01-28 | unknown                                                                                                                                                                                                             | Infectious Disease Control Center                                                                                          | Li,J., Li,L., Li,Z., Qiu,S., Song,H., Li,P. and Li,P.                                                                                                                                 |
| EPI_ISL_413522 | hCoV-19/India/1-27/2020      | Asia / India / Kerala                            | 2020-01-27 | Indian Council of Medical Research - National Institute of Virology                                                                                                                                                 | National Influenza Center, Indian Council of Medical Research - National Institute of Virology                             | Potdar V, Yadav PD, Choudhary ML, Shete-Aich A                                                                                                                                        |
| EPI_ISL_413523 | hCoV-19/India/1-31/2020      | Asia / India / Kerala                            | 2020-01-31 | Indian Council of Medical Research-National Institute of Virology                                                                                                                                                   | National Influenza Center, Indian Council of Medical Research-National Institute of Virology                               | Potdar V, Yadav PD, Choudhary ML, Shete-Aich A                                                                                                                                        |
| EPI_ISL_413550 | hCoV-19/Nigeria/Lagos01/2020 | Africa / Nigeria / Lagos                         | 2020-02-27 | Centre for Human and Zoonotic Virology (CHAZVY), College of Medicine University of Lagos/Lagos University Teaching Hospital (LUTH), part of the Laboratory Network of the Nigeria Centre for Disease Control (NCDC) | African Centre of Excellence for Genomics of Infectious Diseases (ACEGID), Redeemer's University, Ede, Osun State, Nigeria | Oluniyi P.E., Ajogbasile F.V., Kayode A., Oguzie J., Folarin O.A., Ihekweazu C. Happi C.T.                                                                                            |
| EPI_ISL_413555 | hCoV-19/Wales/PHW1/2020      | Europe / United Kingdom / Wales                  | 2020-02-27 | Wales Specialist Virology Centre                                                                                                                                                                                    | Public Health Wales Microbiology Cardiff                                                                                   | Catherine Moore, Cen Sabu, Joanne Watkins, Sally Corden, Tom Connor                                                                                                                   |
| EPI_ISL_413556 | hCoV-19/Wales/PHW2/2020      | Europe / United Kingdom / Wales                  | 2020-03-04 | Wales Specialist Virology Centre                                                                                                                                                                                    | Public Health Wales Microbiology Cardiff                                                                                   | Catherine Moore, Tim Jones, Joanne Watkins, Sally Corden, Tom Connor                                                                                                                  |
| EPI_ISL_413557 | hCoV-19/USA/CA-CDPH-UC1/2020 | North America / USA / California / Sonoma County | 2020-02-28 | California Department of Public Health                                                                                                                                                                              | Chiu Laboratory, University of California, San Francisco                                                                   | Xianding Deng, Scot Federman, Chao-Yang Pan, Hugo Guevara,Wei Gu, Debra A. Wadford, and Charles Y. Chiu                                                                               |
| EPI_ISL_413558 | hCoV-19/USA/CA-CDPH-UC2/2020 | North America / USA / California /               | 2020-02-27 | California Department of Public Health                                                                                                                                                                              | Chiu Laboratory, University of California, San Francisco                                                                   | Xianding Deng, Scot Federman, Chao-Yang Pan, Hugo Guevara,Wei Gu, Debra A. Wadford, and Charles Y. Chiu                                                                               |

|                |                                           |                                                  |            |                                        |                                                          |                                                                                                                                                                                                                                                                                                                                                                                                                                   |
|----------------|-------------------------------------------|--------------------------------------------------|------------|----------------------------------------|----------------------------------------------------------|-----------------------------------------------------------------------------------------------------------------------------------------------------------------------------------------------------------------------------------------------------------------------------------------------------------------------------------------------------------------------------------------------------------------------------------|
|                |                                           | Solano County                                    |            |                                        |                                                          |                                                                                                                                                                                                                                                                                                                                                                                                                                   |
| EPI_ISL_413559 | hCoV-19/USA/CA-CDPH-UC3/2020              | North America / USA / California / Solano County | 2020-02-27 | California Department of Public Health | Chiu Laboratory, University of California, San Francisco | Xianding Deng, Scot Federman, Chao-Yang Pan, Hugo Guevara, Wei Gu, Debra A. Wadford, and Charles Y. Chiu                                                                                                                                                                                                                                                                                                                          |
| EPI_ISL_413560 | hCoV-19/USA/WA-S3/2020                    | North America / USA / Washington                 | 2020-02-28 | Seattle Flu Study                      | Seattle Flu Study                                        | Chu et al                                                                                                                                                                                                                                                                                                                                                                                                                         |
| EPI_ISL_413561 | hCoV-19/USA/CA-CDPH-UC4/2020              | North America / USA / California / Solano County | 2020-02-27 | California Department of Public Health | Chiu Laboratory, University of California, San Francisco | Xianding Deng, Scot Federman, Chao-Yang Pan, Hugo Guevara, Wei Gu, Debra A. Wadford, and Charles Y. Chiu                                                                                                                                                                                                                                                                                                                          |
| EPI_ISL_413562 | hCoV-19/USA/WA11-UW7/2020                 | North America / USA / Washington                 | 2020-03-02 | UW Virology Lab                        | UW Virology Lab                                          | Pavitra Roychoudhury, Hong Xie, Keith Jerome, Alexander Greninger                                                                                                                                                                                                                                                                                                                                                                 |
| EPI_ISL_413563 | hCoV-19/USA/WA12-UW8/2020                 | North America / USA / Washington                 | 2020-03-03 | UW Virology Lab                        | UW Virology Lab                                          | Pavitra Roychoudhury, Hong Xie, Keith Jerome, Alexander Greninger                                                                                                                                                                                                                                                                                                                                                                 |
| EPI_ISL_413564 | hCoV-19/Netherlands/Andel_1365066/2020    | Europe / Netherlands / Andel                     | 2020-03-01 | MHC West-Brabant                       | Erasmus Medical Center                                   | David Nieuwenhuijse, Bas Oude Munnink, Reina Sikkema, Claudia Schapendonk, Irina Chestakova, Anne van der Linden, Mark Pronk, Pascal Lexmond, Corien Swaan, Manon Haverkate, Madelief Mollers, Mart Stein, Sandra Kengne Kanga Mobou, Jeroen van Kampen, Jolanda Voermans, Aura Timen, Corine GeurtsvanKessel, Annemiek van der Eijk, Richard Molenkamp, Marion Koopmans, on behalf of the Dutch national COVID-19 response team. |
| EPI_ISL_413565 | hCoV-19/Netherlands/Berlicum_1363564/2020 | Europe / Netherlands / Berlicum                  | 2020-02-24 | Foundation Pamm                        | Erasmus Medical Center                                   | David Nieuwenhuijse, Bas Oude Munnink, Reina Sikkema, Claudia Schapendonk, Irina Chestakova, Anne van der Linden, Mark Pronk, Pascal Lexmond, Corien Swaan, Manon Haverkate, Madelief Mollers, Mart Stein, Sandra Kengne Kanga Mobou, Jeroen van Kampen, Jolanda Voermans, Aura Timen, Corine GeurtsvanKessel, Annemiek van der Eijk, Richard Molenkamp, Marion Koopmans, on behalf of the Dutch national COVID-19 response team. |
| EPI_ISL_413566 | hCoV-19/Netherlands/Blaricum_1364780/2020 | Europe / Netherlands / Blaricum                  | 2020-03-02 | MHC Gooi & Vechtstreek                 | Erasmus Medical Center                                   | David Nieuwenhuijse, Bas Oude Munnink, Reina Sikkema, Claudia Schapendonk, Irina Chestakova, Anne van der Linden, Mark Pronk, Pascal Lexmond, Corien Swaan, Manon Haverkate, Madelief Mollers, Mart Stein, Sandra Kengne Kanga Mobou, Jeroen van Kampen, Jolanda Voermans, Aura Timen, Corine GeurtsvanKessel, Annemiek van der Eijk, Richard Molenkamp, Marion Koopmans, on behalf of the Dutch national COVID-19 response team. |
| EPI_ISL_413568 | hCoV-19/Netherlands/Dalen_1363624/2020    | Europe / Netherlands / Dalen                     | 2020-03-01 | MHC Drente                             | Erasmus Medical Center                                   | David Nieuwenhuijse, Bas Oude Munnink, Reina Sikkema, Claudia Schapendonk, Irina Chestakova, Anne van der Linden, Mark Pronk, Pascal Lexmond, Corien Swaan, Manon Haverkate, Madelief Mollers, Mart Stein, Sandra Kengne Kanga Mobou, Jeroen van Kampen, Jolanda Voermans, Aura Timen, Corine GeurtsvanKessel, Annemiek van der Eijk, Richard Molenkamp,                                                                          |

|                |                                                         |                                               |            |                                             |                |         |                                                                                                                                                                                                                                                                                                                                                                                                                                   |
|----------------|---------------------------------------------------------|-----------------------------------------------|------------|---------------------------------------------|----------------|---------|-----------------------------------------------------------------------------------------------------------------------------------------------------------------------------------------------------------------------------------------------------------------------------------------------------------------------------------------------------------------------------------------------------------------------------------|
|                |                                                         |                                               |            |                                             |                |         | Marion Koopmans, on behalf of the Dutch national COVID-19 response team.                                                                                                                                                                                                                                                                                                                                                          |
| EPI_ISL_413569 | hCoV-19/Netherlands/Delft_1363424/2020                  | Europe / Netherlands / Delft                  | 2020-02-28 | RIVM                                        | Erasmus Center | Medical | David Nieuwenhuijse, Bas Oude Munnink, Reina Sikkema, Claudia Schapendonk, Irina Chestakova, Anne van der Linden, Mark Pronk, Pascal Lexmond, Corien Swaan, Manon Haverkate, Madelief Mollers, Mart Stein, Sandra Kengne Kamga Mobou, Jeroen van Kampen, Jolanda Voermans, Aura Timen, Corine GeurtsvanKessel, Annemiek van der Eijk, Richard Molenkamp, Marion Koopmans, on behalf of the Dutch national COVID-19 response team. |
| EPI_ISL_413570 | hCoV-19/Netherlands/Diemen_1363454/2020                 | Europe / Netherlands / Diemen                 | 2020-02-28 | RIVM                                        | Erasmus Center | Medical | David Nieuwenhuijse, Bas Oude Munnink, Reina Sikkema, Claudia Schapendonk, Irina Chestakova, Anne van der Linden, Mark Pronk, Pascal Lexmond, Corien Swaan, Manon Haverkate, Madelief Mollers, Mart Stein, Sandra Kengne Kamga Mobou, Jeroen van Kampen, Jolanda Voermans, Aura Timen, Corine GeurtsvanKessel, Annemiek van der Eijk, Richard Molenkamp, Marion Koopmans, on behalf of the Dutch national COVID-19 response team. |
| EPI_ISL_413571 | hCoV-19/Netherlands/Eindhoven_1363782/2020              | Europe / Netherlands / Eindhoven              | 2020-03-02 | MHC Brabant Zuidoost                        | Erasmus Center | Medical | David Nieuwenhuijse, Bas Oude Munnink, Reina Sikkema, Claudia Schapendonk, Irina Chestakova, Anne van der Linden, Mark Pronk, Pascal Lexmond, Corien Swaan, Manon Haverkate, Madelief Mollers, Mart Stein, Sandra Kengne Kamga Mobou, Jeroen van Kampen, Jolanda Voermans, Aura Timen, Corine GeurtsvanKessel, Annemiek van der Eijk, Richard Molenkamp, Marion Koopmans, on behalf of the Dutch national COVID-19 response team. |
| EPI_ISL_413572 | hCoV-19/Netherlands/Haarlem_1363688/2020                | Europe / Netherlands / Haarlem                | 2020-03-01 | MHC Kennemerland                            | Erasmus Center | Medical | David Nieuwenhuijse, Bas Oude Munnink, Reina Sikkema, Claudia Schapendonk, Irina Chestakova, Anne van der Linden, Mark Pronk, Pascal Lexmond, Corien Swaan, Manon Haverkate, Madelief Mollers, Mart Stein, Sandra Kengne Kamga Mobou, Jeroen van Kampen, Jolanda Voermans, Aura Timen, Corine GeurtsvanKessel, Annemiek van der Eijk, Richard Molenkamp, Marion Koopmans, on behalf of the Dutch national COVID-19 response team. |
| EPI_ISL_413573 | hCoV-19/Netherlands/Hardinxveld_Giessendam_1364806/2020 | Europe / Netherlands / Hardinxveld Giessendam | 2020-03-02 | Dienst Gezondheid & Jeugd Zuid-Holland Zuid | Erasmus Center | Medical | David Nieuwenhuijse, Bas Oude Munnink, Reina Sikkema, Claudia Schapendonk, Irina Chestakova, Anne van der Linden, Mark Pronk, Pascal Lexmond, Corien Swaan, Manon Haverkate, Madelief Mollers, Mart Stein, Sandra Kengne Kamga Mobou, Jeroen van Kampen, Jolanda Voermans, Aura Timen, Corine GeurtsvanKessel, Annemiek van der Eijk, Richard Molenkamp, Marion Koopmans, on behalf of the Dutch national COVID-19 response team. |
| EPI_ISL_413574 | hCoV-19/Netherlands/Helmond_1363548/2020                | Europe / Netherlands / Helmond                | 2020-02-29 | MHC West-Brabant                            | Erasmus Center | Medical | David Nieuwenhuijse, Bas Oude Munnink, Reina Sikkema, Claudia Schapendonk, Irina Chestakova, Anne van der Linden, Mark Pronk, Pascal Lexmond, Corien Swaan, Manon Haverkate, Madelief Mollers, Mart Stein, Sandra Kengne Kamga Mobou, Jeroen van Kampen, Jolanda Voermans, Aura Timen, Corine GeurtsvanKessel, Annemiek van der Eijk, Richard Molenkamp, Marion Koopmans, on behalf of the Dutch national COVID-19 response team. |
| EPI_ISL_413575 | hCoV-19/Netherlands/Hout                                | Europe / Netherlands / Houten                 | 2020-02-29 | RIVM                                        | Erasmus Center | Medical | David Nieuwenhuijse, Bas Oude Munnink, Reina Sikkema, Claudia Schapendonk, Irina Chestakova, Anne van der Linden, Mark Pronk, Pascal                                                                                                                                                                                                                                                                                              |

|                |                                               |                                     |            |                        |                |         |                                                                                                                                                                                                                                                                                                                                                                                                                                   |
|----------------|-----------------------------------------------|-------------------------------------|------------|------------------------|----------------|---------|-----------------------------------------------------------------------------------------------------------------------------------------------------------------------------------------------------------------------------------------------------------------------------------------------------------------------------------------------------------------------------------------------------------------------------------|
|                | en_1363498/2020                               |                                     |            |                        |                |         | Lexmond, Corien Swaan, Manon Haverkate, Madelief Mollers, Mart Stein, Sandra Kengne Kamga Mobou, Jeroen van Kampen, Jolanda Voermans, Aura Timen, Corine GeurtsvanKessel, Annemiek van der Eijk, Richard Molenkamp, Marion Koopmans, on behalf of the Dutch national COVID-19 response team.                                                                                                                                      |
| EPI_ISL_413576 | hCoV-19/Netherlands/Loon_op_zand_1363512/2020 | Europe / Netherlands / Loon op zand | 2020-02-29 | RIVM                   | Erasmus Center | Medical | David Nieuwenhuijse, Bas Oude Munnink, Reina Sikkema, Claudia Schapendonk, Irina Chestakova, Anne van der Linden, Mark Pronk, Pascal Lexmond, Corien Swaan, Manon Haverkate, Madelief Mollers, Mart Stein, Sandra Kengne Kamga Mobou, Jeroen van Kampen, Jolanda Voermans, Aura Timen, Corine GeurtsvanKessel, Annemiek van der Eijk, Richard Molenkamp, Marion Koopmans, on behalf of the Dutch national COVID-19 response team. |
| EPI_ISL_413577 | hCoV-19/Netherlands/Naarden_1364774/2020      | Europe / Netherlands / Naarden      | 2020-03-02 | MHC Gooi & Vechtstreek | Erasmus Center | Medical | David Nieuwenhuijse, Bas Oude Munnink, Reina Sikkema, Claudia Schapendonk, Irina Chestakova, Anne van der Linden, Mark Pronk, Pascal Lexmond, Corien Swaan, Manon Haverkate, Madelief Mollers, Mart Stein, Sandra Kengne Kamga Mobou, Jeroen van Kampen, Jolanda Voermans, Aura Timen, Corine GeurtsvanKessel, Annemiek van der Eijk, Richard Molenkamp, Marion Koopmans, on behalf of the Dutch national COVID-19 response team. |
| EPI_ISL_413578 | hCoV-19/Netherlands/Nieuwendijk_1363582/2020  | Europe / Netherlands / Nieuwendijk  | 2020-03-01 | ErasmusMC              | Erasmus Center | Medical | David Nieuwenhuijse, Bas Oude Munnink, Reina Sikkema, Claudia Schapendonk, Irina Chestakova, Anne van der Linden, Mark Pronk, Pascal Lexmond, Corien Swaan, Manon Haverkate, Madelief Mollers, Mart Stein, Sandra Kengne Kamga Mobou, Jeroen van Kampen, Jolanda Voermans, Aura Timen, Corine GeurtsvanKessel, Annemiek van der Eijk, Richard Molenkamp, Marion Koopmans, on behalf of the Dutch national COVID-19 response team. |
| EPI_ISL_413579 | hCoV-19/Netherlands/Nootdorp_1364222/2020     | Europe / Netherlands / Nootdorp     | 2020-03-03 | MHC Haaglanden         | Erasmus Center | Medical | David Nieuwenhuijse, Bas Oude Munnink, Reina Sikkema, Claudia Schapendonk, Irina Chestakova, Anne van der Linden, Mark Pronk, Pascal Lexmond, Corien Swaan, Manon Haverkate, Madelief Mollers, Mart Stein, Sandra Kengne Kamga Mobou, Jeroen van Kampen, Jolanda Voermans, Aura Timen, Corine GeurtsvanKessel, Annemiek van der Eijk, Richard Molenkamp, Marion Koopmans, on behalf of the Dutch national COVID-19 response team. |
| EPI_ISL_413580 | hCoV-19/Netherlands/Oisterwijk_1364072/2020   | Europe / Netherlands / Oisterwijk   | 2020-03-02 | MHC Hart voor Brabant  | Erasmus Center | Medical | David Nieuwenhuijse, Bas Oude Munnink, Reina Sikkema, Claudia Schapendonk, Irina Chestakova, Anne van der Linden, Mark Pronk, Pascal Lexmond, Corien Swaan, Manon Haverkate, Madelief Mollers, Mart Stein, Sandra Kengne Kamga Mobou, Jeroen van Kampen, Jolanda Voermans, Aura Timen, Corine GeurtsvanKessel, Annemiek van der Eijk, Richard Molenkamp, Marion Koopmans, on behalf of the Dutch national COVID-19 response team. |
| EPI_ISL_413581 | hCoV-19/Netherlands/Oss_1363500/2020          | Europe / Netherlands / Oss          | 2020-02-29 | RIVM                   | Erasmus Center | Medical | David Nieuwenhuijse, Bas Oude Munnink, Reina Sikkema, Claudia Schapendonk, Irina Chestakova, Anne van der Linden, Mark Pronk, Pascal Lexmond, Corien Swaan, Manon Haverkate, Madelief Mollers, Mart Stein, Sandra Kengne Kamga Mobou, Jeroen van Kampen, Jolanda Voermans, Aura Timen, Corine GeurtsvanKessel, Annemiek van der Eijk, Richard Molenkamp,                                                                          |

|                |                                            |                                  |            |                                            |                |         |                                                                                                                                                                                                                                                                                                                                                                                                                                   |
|----------------|--------------------------------------------|----------------------------------|------------|--------------------------------------------|----------------|---------|-----------------------------------------------------------------------------------------------------------------------------------------------------------------------------------------------------------------------------------------------------------------------------------------------------------------------------------------------------------------------------------------------------------------------------------|
|                |                                            |                                  |            |                                            |                |         | Marion Koopmans, on behalf of the Dutch national COVID-19 response team.                                                                                                                                                                                                                                                                                                                                                          |
| EPI_ISL_413582 | hCoV-19/Netherlands/Rotterdam_1363790/2020 | Europe / Netherlands / Rotterdam | 2020-03-01 | ErasmusMC                                  | Erasmus Center | Medical | David Nieuwenhuijse, Bas Oude Munnink, Reina Sikkema, Claudia Schapendonk, Irina Chestakova, Anne van der Linden, Mark Pronk, Pascal Lexmond, Corien Swaan, Manon Haverkate, Madelief Mollers, Mart Stein, Sandra Kengne Kamga Mobou, Jeroen van Kampen, Jolanda Voermans, Aura Timen, Corine GeurtsvanKessel, Annemiek van der Eijk, Richard Molenkamp, Marion Koopmans, on behalf of the Dutch national COVID-19 response team. |
| EPI_ISL_413583 | hCoV-19/Netherlands/Rotterdam_1364040/2020 | Europe / Netherlands / Rotterdam | 2020-03-02 | MHC Rotterdam-Rijnmond                     | Erasmus Center | Medical | David Nieuwenhuijse, Bas Oude Munnink, Reina Sikkema, Claudia Schapendonk, Irina Chestakova, Anne van der Linden, Mark Pronk, Pascal Lexmond, Corien Swaan, Manon Haverkate, Madelief Mollers, Mart Stein, Sandra Kengne Kamga Mobou, Jeroen van Kampen, Jolanda Voermans, Aura Timen, Corine GeurtsvanKessel, Annemiek van der Eijk, Richard Molenkamp, Marion Koopmans, on behalf of the Dutch national COVID-19 response team. |
| EPI_ISL_413584 | hCoV-19/Netherlands/Rotterdam_1364740/2020 | Europe / Netherlands / Rotterdam | 2020-03-03 | unknown                                    | Erasmus Center | Medical | David Nieuwenhuijse, Bas Oude Munnink, Reina Sikkema, Claudia Schapendonk, Irina Chestakova, Anne van der Linden, Mark Pronk, Pascal Lexmond, Corien Swaan, Manon Haverkate, Madelief Mollers, Mart Stein, Sandra Kengne Kamga Mobou, Jeroen van Kampen, Jolanda Voermans, Aura Timen, Corine GeurtsvanKessel, Annemiek van der Eijk, Richard Molenkamp, Marion Koopmans, on behalf of the Dutch national COVID-19 response team. |
| EPI_ISL_413586 | hCoV-19/Netherlands/Tilburg_1363354/2020   | Europe / Netherlands / Tilburg   | 2020-02-27 | Foundation Elisabeth-Tweesteden Ziekenhuis | Erasmus Center | Medical | David Nieuwenhuijse, Bas Oude Munnink, Reina Sikkema, Claudia Schapendonk, Irina Chestakova, Anne van der Linden, Mark Pronk, Pascal Lexmond, Corien Swaan, Manon Haverkate, Madelief Mollers, Mart Stein, Sandra Kengne Kamga Mobou, Jeroen van Kampen, Jolanda Voermans, Aura Timen, Corine GeurtsvanKessel, Annemiek van der Eijk, Richard Molenkamp, Marion Koopmans, on behalf of the Dutch national COVID-19 response team. |
| EPI_ISL_413587 | hCoV-19/Netherlands/Tilburg_1364286/2020   | Europe / Netherlands / Tilburg   | 2020-03-03 | Foundation Elisabeth-Tweesteden Ziekenhuis | Erasmus Center | Medical | David Nieuwenhuijse, Bas Oude Munnink, Reina Sikkema, Claudia Schapendonk, Irina Chestakova, Anne van der Linden, Mark Pronk, Pascal Lexmond, Corien Swaan, Manon Haverkate, Madelief Mollers, Mart Stein, Sandra Kengne Kamga Mobou, Jeroen van Kampen, Jolanda Voermans, Aura Timen, Corine GeurtsvanKessel, Annemiek van der Eijk, Richard Molenkamp, Marion Koopmans, on behalf of the Dutch national COVID-19 response team. |
| EPI_ISL_413588 | hCoV-19/Netherlands/Utrecht_1363564/2020   | Europe / Netherlands / Utrecht   | 2020-03-01 | MHC Utrecht                                | Erasmus Center | Medical | David Nieuwenhuijse, Bas Oude Munnink, Reina Sikkema, Claudia Schapendonk, Irina Chestakova, Anne van der Linden, Mark Pronk, Pascal Lexmond, Corien Swaan, Manon Haverkate, Madelief Mollers, Mart Stein, Sandra Kengne Kamga Mobou, Jeroen van Kampen, Jolanda Voermans, Aura Timen, Corine GeurtsvanKessel, Annemiek van der Eijk, Richard Molenkamp, Marion Koopmans, on behalf of the Dutch national COVID-19 response team. |
| EPI_ISL_413589 | hCoV-19/Netherlands/Utrecht                | Europe / Netherlands / Utrecht   | 2020-03-01 | MHC Utrecht                                | Erasmus Center | Medical | David Nieuwenhuijse, Bas Oude Munnink, Reina Sikkema, Claudia Schapendonk, Irina Chestakova, Anne van der Linden, Mark Pronk, Pascal                                                                                                                                                                                                                                                                                              |



|                |                                            |                                    |            |                                                                        |                                                                                                                      |  |                                                                                                                                                                                                                                                                                                                                                                                                                                   |
|----------------|--------------------------------------------|------------------------------------|------------|------------------------------------------------------------------------|----------------------------------------------------------------------------------------------------------------------|--|-----------------------------------------------------------------------------------------------------------------------------------------------------------------------------------------------------------------------------------------------------------------------------------------------------------------------------------------------------------------------------------------------------------------------------------|
|                | t_1363628/2020                             |                                    |            |                                                                        |                                                                                                                      |  | Lexmond, Corien Swaan, Manon Haverkate, Madelief Mollers, Mart Stein, Sandra Kengne Kamga Mobou, Jeroen van Kampen, Jolanda Voermans, Aura Timen, Corine GeurtsvanKessel, Annemiek van der Eijk, Richard Molenkamp, Marion Koopmans, on behalf of the Dutch national COVID-19 response team.                                                                                                                                      |
| EPI_ISL_413590 | hCoV-19/Netherlands/Utrecht_t_1364066/2020 | Europe / Netherlands / Utrecht     | 2020-03-02 | MHC Utrecht                                                            | Erasmus Medical Center                                                                                               |  | David Nieuwenhuijse, Bas Oude Munnink, Reina Sikkema, Claudia Schapendonk, Irina Chestakova, Anne van der Linden, Mark Pronk, Pascal Lexmond, Corien Swaan, Manon Haverkate, Madelief Mollers, Mart Stein, Sandra Kengne Kamga Mobou, Jeroen van Kampen, Jolanda Voermans, Aura Timen, Corine GeurtsvanKessel, Annemiek van der Eijk, Richard Molenkamp, Marion Koopmans, on behalf of the Dutch national COVID-19 response team. |
| EPI_ISL_413591 | hCoV-19/Netherlands/Zeevolde_1365080/2020  | Europe / Netherlands / Zeewolde    | 2020-03-02 | MHC Flevoland                                                          | Erasmus Medical Center                                                                                               |  | David Nieuwenhuijse, Bas Oude Munnink, Reina Sikkema, Claudia Schapendonk, Irina Chestakova, Anne van der Linden, Mark Pronk, Pascal Lexmond, Corien Swaan, Manon Haverkate, Madelief Mollers, Mart Stein, Sandra Kengne Kamga Mobou, Jeroen van Kampen, Jolanda Voermans, Aura Timen, Corine GeurtsvanKessel, Annemiek van der Eijk, Richard Molenkamp, Marion Koopmans, on behalf of the Dutch national COVID-19 response team. |
| EPI_ISL_413592 | hCoV-19/Taiwan/NTU03/2020                  | Asia / Taiwan / Taipei             | 2020-03-02 | Department of Laboratory Medicine, National Taiwan University Hospital | Microbial Genomics Core Lab, National Taiwan University Centers of Genomic and Precision Medicine                    |  | Shiou-Hwei Yeh, You-Yu Lin, Ya-Yun Lai, Chiao-Ling Li, Shan-Chwen Chang, Pei-Jer Chen, Sui-Yuan Chang                                                                                                                                                                                                                                                                                                                             |
| EPI_ISL_413593 | hCoV-19/Luxembourg/Lux1/2020               | Europe / Luxembourg                | 2020-02-29 | Laboratoire National de Santé                                          | Erasmus Medical Center                                                                                               |  | David Nieuwenhuijse, Bas Oude Munnink, Reina Sikkema, Claudia Schapendonk, Irina Chestakova, Anne van der Linden, Mark Pronk, Pascal Lexmond, T. Abdelrahman, G. Fournier, J. Mossong, T. Nguyen, Jeroen van Kampen, Jolanda Voermans, Corine GeurtsvanKessel, Annemiek van der Eijk, Richard Molenkamp, Marion Koopmans, on behalf of the Dutch national COVID-19 response team.                                                 |
| EPI_ISL_413594 | hCoV-19/Australia/NSW08/2020               | Oceania / Australia / NSW / Sydney | 2020-02-28 | Centre for Infectious Diseases and Microbiology Laboratory Services    | NSW Health Pathology - Institute of Clinical Pathology and Medical Research; Westmead Hospital; University of Sydney |  | Rockett R, Eden J-S, Lam C, Gray K, Timms, V, Gall, M, Alicia, A, Carter I, Rahman H, Holmes EC,, O'Sullivan MV, Sintchenko V, Chen SC, Maddocks S, Kok J and Dwyer DE for the 2019-nCoV Study Group*                                                                                                                                                                                                                             |
| EPI_ISL_413596 | hCoV-19/Australia/NSW10/2020               | Oceania / Australia / NSW / Sydney | 2020-02-28 | Centre for Infectious Diseases and Microbiology - Public Health        | NSW Health Pathology - Institute of Clinical Pathology and Medical Research; Westmead Hospital; University of Sydney |  | Rockett R, Eden J-S, Lam C, Gray K, Timms, V, Gall, M, Carter I, Rahman H, Holmes EC, O'Sullivan MV, Sintchenko V, Chen SC, Maddocks S, Kok J and Dwyer DE for the 2019-nCoV Study Group*                                                                                                                                                                                                                                         |
| EPI_ISL_413597 | hCoV-19/Australia/NSW11/2020               | Oceania / Australia / NSW / Sydney | 2020-03-02 | Centre for Infectious Diseases and Microbiology- Public Health         | NSW Health Pathology - Institute of Clinical Pathology and Medical Research; Westmead Hospital; University of Sydney |  | Lam C, Eden J-S, Rockett R, Gray K, Timms, V, Gall, M, Carter I, Rahman H, Holmes EC, O'Sullivan MV, Sintchenko V, Chen SC, Maddocks S, Kok J and Dwyer DE for the 2019-nCoV Study Group*                                                                                                                                                                                                                                         |
| EPI_ISL_413598 | hCoV-19/Australia/NSW12/2020               | Oceania / Australia / NSW / Sydney | 2020-03-04 | Centre for Infectious Diseases and Microbiology - Public Health        | NSW Health Pathology - Institute of Clinical Pathology and Medical Research; Westmead                                |  | Gray K, Eden J-S, Lam C, Rockett R, Timms, V, Gall, M, Carter I, Rahman H, Holmes EC, O'Sullivan MV, Sintchenko V, Chen SC, Maddocks S, Kok J and Dwyer DE for the 2019-nCoV Study Group*                                                                                                                                                                                                                                         |

|                |                                   |                                    |            |                                                                                                                |                                                                                                                      |                                                                                                                                                                                           |
|----------------|-----------------------------------|------------------------------------|------------|----------------------------------------------------------------------------------------------------------------|----------------------------------------------------------------------------------------------------------------------|-------------------------------------------------------------------------------------------------------------------------------------------------------------------------------------------|
|                |                                   |                                    |            |                                                                                                                | Hospital; University of Sydney                                                                                       |                                                                                                                                                                                           |
| EPI_ISL_413599 | hCoV-19/Australia/NSW13/2020      | Oceania / Australia / NSW / Sydney | 2020-03-04 | Centre for Infectious Diseases and Microbiology - Public Health                                                | NSW Health Pathology - Institute of Clinical Pathology and Medical Research; Westmead Hospital; University of Sydney | Timms, V, Eden J-S, Lam C, Gray K, Rockett R, Gall, M, Carter I, Rahman H, Holmes EC, O'Sullivan MV, Sintchenko V, Chen SC, Maddocks S, Kok J and Dwyer DE for the 2019-nCoV Study Group* |
| EPI_ISL_413600 | hCoV-19/Australia/NSW14/2020      | Oceania / Australia / NSW / Sydney | 2020-03-03 | Centre for Infectious Diseases and Microbiology - Public Health                                                | NSW Health Pathology - Institute of Clinical Pathology and Medical Research; Westmead Hospital; University of Sydney | Gall, M, Eden J-S, Lam C, Gray K, Timms, V, Rockett R, Carter I, Rahman H, Holmes EC, O'Sullivan MV, Sintchenko V, Chen SC, Maddocks S, Kok J and Dwyer DE for the 2019-nCoV Study Group* |
| EPI_ISL_413601 | hCoV-19/USA/WA13-UW9/2020         | North America / USA / Washington   | 2020-03-02 | UW Virology Lab                                                                                                | UW Virology Lab                                                                                                      | Pavitra Roychoudhury, Hong Xie, Keith Jerome, Alexander Greninger                                                                                                                         |
| EPI_ISL_413602 | hCoV-19/Finland/FIN03032020A/2020 | Europe / Finland / Helsinki        | 2020-03-03 | Department of Virology and Immunology, University of Helsinki and Helsinki University Hospital, Huslab Finland | Department of Virology, Faculty of Medicine, University of Helsinki, Helsinki, Finland                               | Teemu Smura, Hannimari Kallio-Kokko, Olli Vapalahti                                                                                                                                       |
| EPI_ISL_413603 | hCoV-19/Finland/FIN03032020B/2020 | Europe / Finland / Helsinki        | 2020-03-03 | Department of Virology and Immunology, University of Helsinki and Helsinki University Hospital, Huslab Finland | Department of Virology, Faculty of Medicine, University of Helsinki, Helsinki, Finland                               | Teemu Smura, Hannimari Kallio-Kokko, Olli Vapalahti                                                                                                                                       |
| EPI_ISL_413604 | hCoV-19/Finland/FIN03032020C/2020 | Europe / Finland / Helsinki        | 2020-03-03 | Department of Virology and Immunology, University of Helsinki and Helsinki University Hospital, Huslab Finland | Department of Virology, Faculty of Medicine, University of Helsinki, Helsinki, Finland                               | Teemu Smura, Hannimari Kallio-Kokko, Olli Vapalahti                                                                                                                                       |
| EPI_ISL_413605 | hCoV-19/Finland/FIN01032020/2020  | Europe / Finland / Helsinki        | 2020-03-01 | Department of Virology and Immunology, University of Helsinki and Helsinki University Hospital, Huslab Finland | Department of Virology, Faculty of Medicine, University of Helsinki, Helsinki, Finland                               | Teemu Smura, Hannimari Kallio-Kokko, Olli Vapalahti                                                                                                                                       |
| EPI_ISL_413647 | hCoV-19/Portugal/CV62/2020        | Europe / Portugal                  | 2020-03-01 | Centro Hospital do Porto, E.P.E. - H. Geral de Santo Antonio                                                   | Instituto Nacional de Saude (INSA)                                                                                   | Raquel Guiomar, Inês Costa, Pedro Pechirra, Joana Mendonça, Luís Vieira, Helena Ramos, Joana Isidro, Vítor Borges, João Paulo Gomes                                                       |
| EPI_ISL_413648 | hCoV-19/Portugal/CV63/2020        | Europe / Portugal                  | 2020-03-01 | Centro Hospitalar e Universitário de Sao Joao, Porto                                                           | Instituto Nacional de Saude (INSA)                                                                                   | Raquel Guiomar, Inês Costa, Pedro Pechirra, Joana Mendonça, Luís Vieira, João Tiago Guimarães, Joana Isidro, Vítor Borges, João Paulo Gomes                                               |

|                |                            |                                  |            |                                                   |                                                                  |                                                                                                                                                                                   |
|----------------|----------------------------|----------------------------------|------------|---------------------------------------------------|------------------------------------------------------------------|-----------------------------------------------------------------------------------------------------------------------------------------------------------------------------------|
| EPI_ISL_413649 | hCoV-19/USA/WA14-UW10/2020 | North America / USA / Washington | 2020-03-05 | UW Virology Lab                                   | UW Virology Lab                                                  | Pavitra Roychoudhury, Hong Xie, Keith Jerome, Alexander Greninger                                                                                                                 |
| EPI_ISL_413650 | hCoV-19/USA/WA15-UW11/2020 | North America / USA / Washington | 2020-03-05 | UW Virology Lab                                   | UW Virology Lab                                                  | Pavitra Roychoudhury, Hong Xie, Keith Jerome, Alexander Greninger                                                                                                                 |
| EPI_ISL_413651 | hCoV-19/USA/WA16-UW12/2020 | North America / USA / Washington | 2020-03-05 | UW Virology Lab                                   | UW Virology Lab                                                  | Pavitra Roychoudhury, Hong Xie, Keith Jerome, Alexander Greninger                                                                                                                 |
| EPI_ISL_413652 | hCoV-19/USA/WA17-UW13/2020 | North America / USA / Washington | 2020-03-05 | UW Virology Lab                                   | UW Virology Lab                                                  | Pavitra Roychoudhury, Hong Xie, Keith Jerome, Alexander Greninger                                                                                                                 |
| EPI_ISL_413653 | hCoV-19/USA/WA18-UW14/2020 | North America / USA / Washington | 2020-03-05 | UW Virology Lab                                   | UW Virology Lab                                                  | Pavitra Roychoudhury, Hong Xie, Keith Jerome, Alexander Greninger                                                                                                                 |
| EPI_ISL_413691 | hCoV-19/China/WF0001/2020  | Asia / China                     | 2020-01    | Weifang Center for Disease Control and Prevention | Weifang Center for Disease Control and Prevention & BGI-Shenzhen | Qing Nie, Xingguang Li, Erik M Volz, Han Fu, Haowei Wang, Xiaoyue Xi, Wei Chen, Dehui Liu, Yingying Chen, Mengmeng Tian, Wei Tan, Junjie Zai, Wanying Sun, Jiandong Li, Junhua Li |
| EPI_ISL_413692 | hCoV-19/China/WF0002/2020  | Asia / China                     | 2020-01    | Weifang Center for Disease Control and Prevention | Weifang Center for Disease Control and Prevention & BGI-Shenzhen | Qing Nie, Xingguang Li, Erik M Volz, Han Fu, Haowei Wang, Xiaoyue Xi, Wei Chen, Dehui Liu, Yingying Chen, Mengmeng Tian, Wei Tan, Junjie Zai, Wanying Sun, Jiandong Li, Junhua Li |
| EPI_ISL_413693 | hCoV-19/China/WF0003/2020  | Asia / China                     | 2020-01    | Weifang Center for Disease Control and Prevention | Weifang Center for Disease Control and Prevention & BGI-Shenzhen | Qing Nie, Xingguang Li, Erik M Volz, Han Fu, Haowei Wang, Xiaoyue Xi, Wei Chen, Dehui Liu, Yingying Chen, Mengmeng Tian, Wei Tan, Junjie Zai, Wanying Sun, Jiandong Li, Junhua Li |
| EPI_ISL_413694 | hCoV-19/China/WF0004/2020  | Asia / China                     | 2020-01    | Weifang Center for Disease Control and Prevention | Weifang Center for Disease Control and Prevention & BGI-Shenzhen | Qing Nie, Xingguang Li, Erik M Volz, Han Fu, Haowei Wang, Xiaoyue Xi, Wei Chen, Dehui Liu, Yingying Chen, Mengmeng Tian, Wei Tan, Junjie Zai, Wanying Sun, Jiandong Li, Junhua Li |
| EPI_ISL_413697 | hCoV-19/China/WF0012/2020  | Asia / China                     | 2020-02    | Weifang Center for Disease Control and Prevention | Weifang Center for Disease Control and Prevention & BGI-Shenzhen | Qing Nie, Xingguang Li, Erik M Volz, Han Fu, Haowei Wang, Xiaoyue Xi, Wei Chen, Dehui Liu, Yingying Chen, Mengmeng Tian, Wei Tan, Junjie Zai, Wanying Sun, Jiandong Li, Junhua Li |
| EPI_ISL_413711 | hCoV-19/China/WF0014/2020  | Asia / China                     | 2020-02    | Weifang Center for Disease Control and Prevention | Weifang Center for Disease Control and Prevention & BGI-Shenzhen | Qing Nie, Xingguang Li, Erik M Volz, Han Fu, Haowei Wang, Xiaoyue Xi, Wei Chen, Dehui Liu, Yingying Chen, Mengmeng Tian, Wei Tan, Junjie Zai, Wanying Sun, Jiandong Li, Junhua Li |
| EPI_ISL_413729 | hCoV-19/China/WF0015/2020  | Asia / China                     | 2020-02    | Weifang Center for Disease Control and Prevention | Weifang Center for Disease Control and Prevention & BGI-Shenzhen | Qing Nie, Xingguang Li, Erik M Volz, Han Fu, Haowei Wang, Xiaoyue Xi, Wei Chen, Dehui Liu, Yingying Chen, Mengmeng Tian, Wei Tan, Junjie Zai, Wanying Sun, Jiandong Li, Junhua Li |
| EPI_ISL_413746 | hCoV-19/China/WF0016/2020  | Asia / China                     | 2020-02    | Weifang Center for Disease Control and Prevention | Weifang Center for Disease Control and Prevention & BGI-Shenzhen | Qing Nie, Xingguang Li, Erik M Volz, Han Fu, Haowei Wang, Xiaoyue Xi, Wei Chen, Dehui Liu, Yingying Chen, Mengmeng Tian, Wei Tan, Junjie Zai, Wanying Sun, Jiandong Li, Junhua Li |
| EPI_ISL_413748 | hCoV-19/China/WF0018/2020  | Asia / China                     | 2020-02    | Weifang Center for Disease Control and Prevention | Weifang Center for Disease Control and Prevention & BGI-Shenzhen | Qing Nie, Xingguang Li, Erik M Volz, Han Fu, Haowei Wang, Xiaoyue Xi, Wei Chen, Dehui Liu, Yingying Chen, Mengmeng Tian, Wei Tan, Junjie Zai, Wanying Sun, Jiandong Li, Junhua Li |
| EPI_ISL_413749 | hCoV-19/China/WF0019/2020  | Asia / China                     | 2020-02    | Weifang Center for Disease Control and Prevention | Weifang Center for Disease Control and Prevention & BGI-Shenzhen | Qing Nie, Xingguang Li, Erik M Volz, Han Fu, Haowei Wang, Xiaoyue Xi, Wei Chen, Dehui Liu, Yingying Chen, Mengmeng Tian, Wei Tan, Junjie Zai, Wanying Sun, Jiandong Li, Junhua Li |

|                |                                          |                          |            |                                                                                                                   |                                                                  |                                                                                                                                                                                                                                                                                                                                                                                                                                                |
|----------------|------------------------------------------|--------------------------|------------|-------------------------------------------------------------------------------------------------------------------|------------------------------------------------------------------|------------------------------------------------------------------------------------------------------------------------------------------------------------------------------------------------------------------------------------------------------------------------------------------------------------------------------------------------------------------------------------------------------------------------------------------------|
| EPI_ISL_413750 | hCoV-19/China/WF0020/2020                | Asia / China             | 2020-02    | Weifang Center for Disease Control and Prevention                                                                 | Weifang Center for Disease Control and Prevention & BGI-Shenzhen | Qing Nie, Xingguang Li, Erik M Volz, Han Fu, Haowei Wang, Xiaoyue Xi, Wei Chen, Dehui Liu, Yingying Chen, Mengmeng Tian, Wei Tan, Junjie Zai, Wanying Sun, Jiandong Li, Junhua Li                                                                                                                                                                                                                                                              |
| EPI_ISL_413751 | hCoV-19/China/WF0021/2020                | Asia / China             | 2020-02    | Weifang Center for Disease Control and Prevention                                                                 | Weifang Center for Disease Control and Prevention & BGI-Shenzhen | Qing Nie, Xingguang Li, Erik M Volz, Han Fu, Haowei Wang, Xiaoyue Xi, Wei Chen, Dehui Liu, Yingying Chen, Mengmeng Tian, Wei Tan, Junjie Zai, Wanying Sun, Jiandong Li, Junhua Li                                                                                                                                                                                                                                                              |
| EPI_ISL_413752 | hCoV-19/China/WF0023/2020                | Asia / China             | 2020-02    | Weifang Center for Disease Control and Prevention                                                                 | Weifang Center for Disease Control and Prevention & BGI-Shenzhen | Qing Nie, Xingguang Li, Erik M Volz, Han Fu, Haowei Wang, Xiaoyue Xi, Wei Chen, Dehui Liu, Yingying Chen, Mengmeng Tian, Wei Tan, Junjie Zai, Wanying Sun, Jiandong Li, Junhua Li                                                                                                                                                                                                                                                              |
| EPI_ISL_413753 | hCoV-19/China/WF0024/2020                | Asia / China             | 2020-02    | Weifang Center for Disease Control and Prevention                                                                 | Weifang Center for Disease Control and Prevention & BGI-Shenzhen | Qing Nie, Xingguang Li, Erik M Volz, Han Fu, Haowei Wang, Xiaoyue Xi, Wei Chen, Dehui Liu, Yingying Chen, Mengmeng Tian, Wei Tan, Junjie Zai, Wanying Sun, Jiandong Li, Junhua Li                                                                                                                                                                                                                                                              |
| EPI_ISL_413761 | hCoV-19/China/WF0026/2020                | Asia / China             | 2020-02    | Weifang Center for Disease Control and Prevention                                                                 | Weifang Center for Disease Control and Prevention & BGI-Shenzhen | Qing Nie, Xingguang Li, Erik M Volz, Han Fu, Haowei Wang, Xiaoyue Xi, Wei Chen, Dehui Liu, Yingying Chen, Mengmeng Tian, Wei Tan, Junjie Zai, Wanying Sun, Jiandong Li, Junhua Li                                                                                                                                                                                                                                                              |
| EPI_ISL_413791 | hCoV-19/China/WF0028/2020                | Asia / China             | 2020-02    | Weifang Center for Disease Control and Prevention                                                                 | Weifang Center for Disease Control and Prevention & BGI-Shenzhen | Qing Nie, Xingguang Li, Erik M Volz, Han Fu, Haowei Wang, Xiaoyue Xi, Wei Chen, Dehui Liu, Yingying Chen, Mengmeng Tian, Wei Tan, Junjie Zai, Wanying Sun, Jiandong Li, Junhua Li                                                                                                                                                                                                                                                              |
| EPI_ISL_413809 | hCoV-19/China/WF0029/2020                | Asia / China             | 2020-02    | Weifang Center for Disease Control and Prevention                                                                 | Weifang Center for Disease Control and Prevention & BGI-Shenzhen | Qing Nie, Xingguang Li, Erik M Volz, Han Fu, Haowei Wang, Xiaoyue Xi, Wei Chen, Dehui Liu, Yingying Chen, Mengmeng Tian, Wei Tan, Junjie Zai, Wanying Sun, Jiandong Li, Junhua Li                                                                                                                                                                                                                                                              |
| EPI_ISL_413850 | hCoV-19/Guangdong/GDFS2020054-P0005/2020 | Asia / China / Guangdong | 2020-02-10 | Guangdong Provincial Institution of Public Health, Guangdong Provincial Center for Disease Control and Prevention | Guangdong Provincial Institution of Public Health                | Jing Lu, Louis du Plessis, Liu Zhe, Jiufeng Sun, Sarah François, Huifang Lin, Moritz Kraemer, Jingju Peng, Qianlin Xiong, Runyu Yuan, Lilian Zeng, Pingping Zhou, Chuming Liang, Tao Liu, Wei Li, Juan Su, Huanying Zheng, Kang Min, Song Tie, Bo Peng, Shisong Fang, Wenzhe Su, Kuibiao Li, Ruilin Sun, Ru bai, Xi Tang, Minfeng Liang, Nuno Faria, Josh Quick, Andrew Rambaut, Verity Hill, Wenjun Ma, Nick Loman, Oliver Pybus, Changwen Ke |
| EPI_ISL_413851 | hCoV-19/Guangdong/2020XN4373-P0039/2020  | Asia / China / Guangdong | 2020-01-30 | Guangdong Provincial Institution of Public Health, Guangdong Provincial Center for Disease Control and Prevention | Guangdong Provincial Institution of Public Health                | Jing Lu, Louis du Plessis, Liu Zhe, Jiufeng Sun, Sarah François, Huifang Lin, Moritz Kraemer, Jingju Peng, Qianlin Xiong, Runyu Yuan, Lilian Zeng, Pingping Zhou, Chuming Liang, Tao Liu, Wei Li, Juan Su, Huanying Zheng, Kang Min, Song Tie, Bo Peng, Shisong Fang, Wenzhe Su, Kuibiao Li, Ruilin Sun, Ru bai, Xi Tang, Minfeng Liang, Nuno Faria, Josh Quick, Andrew Rambaut, Verity Hill, Wenjun Ma, Nick Loman, Oliver Pybus, Changwen Ke |
| EPI_ISL_413852 | hCoV-19/Guangdong/2020XN4433-P0040/2020  | Asia / China / Guangdong | 2020-01-30 | Guangdong Provincial Institution of Public Health, Guangdong Provincial Center for Disease Control and Prevention | Guangdong Provincial Institution of Public Health                | Jing Lu, Louis du Plessis, Liu Zhe, Jiufeng Sun, Sarah François, Huifang Lin, Moritz Kraemer, Jingju Peng, Qianlin Xiong, Runyu Yuan, Lilian Zeng, Pingping Zhou, Chuming Liang, Tao Liu, Wei Li, Juan Su, Huanying Zheng, Kang Min, Song Tie, Bo Peng, Shisong Fang, Wenzhe Su, Kuibiao Li, Ruilin Sun, Ru bai, Xi Tang, Minfeng Liang, Nuno Faria, Josh Quick, Andrew Rambaut, Verity Hill, Wenjun Ma, Nick Loman, Oliver Pybus, Changwen Ke |
| EPI_ISL_413853 | hCoV-19/Guangdong/2020XN4243-P0035/2020  | Asia / China / Guangdong | 2020-01-30 | Guangdong Provincial Institution of Public Health, Guangdong                                                      | Guangdong Provincial Institution of Public Health                | Jing Lu, Louis du Plessis, Liu Zhe, Jiufeng Sun, Sarah François, Huifang Lin, Moritz Kraemer, Jingju Peng, Qianlin Xiong, Runyu Yuan, Lilian Zeng, Pingping Zhou, Chuming Liang, Tao Liu, Wei Li, Juan Su, Huanying Zheng, Kang Min, Song                                                                                                                                                                                                      |

|                |                                         |                          |            |                                                                                                                   |                                                   |                                                                                                                                                                                                                                                                                                                                                                                                                                                |
|----------------|-----------------------------------------|--------------------------|------------|-------------------------------------------------------------------------------------------------------------------|---------------------------------------------------|------------------------------------------------------------------------------------------------------------------------------------------------------------------------------------------------------------------------------------------------------------------------------------------------------------------------------------------------------------------------------------------------------------------------------------------------|
|                |                                         |                          |            | Provincial Center for Disease Control and Prevention                                                              |                                                   | Tie, Bo Peng, Shisong Fang, Wenzhe Su, Kuibiao Li, Ruilin Sun, Ru bai, Xi Tang, Minfeng Liang, Nuno Faria, Josh Quick, Andrew Rambaut, Verity Hill, Wenjun Ma, Nick Loman, Oliver Pybus, Changwen Ke                                                                                                                                                                                                                                           |
| EPI_ISL_413854 | hCoV-19/Guangdong/2020XN4475-P0042/2020 | Asia / China / Guangdong | 2020-01-30 | Guangdong Provincial Institution of Public Health, Guangdong Provincial Center for Disease Control and Prevention | Guangdong Provincial Institution of Public Health | Jing Lu, Louis du Plessis, Liu Zhe, Jiufeng Sun, Sarah François, Huifang Lin, Moritz Kraemer, Jingju Peng, Qianlin Xiong, Runyu Yuan, Lilian Zeng, Pingping Zhou, Chuming Liang, Tao Liu, Wei Li, Juan Su, Huanying Zheng, Kang Min, Song Tie, Bo Peng, Shisong Fang, Wenzhe Su, Kuibiao Li, Ruilin Sun, Ru bai, Xi Tang, Minfeng Liang, Nuno Faria, Josh Quick, Andrew Rambaut, Verity Hill, Wenjun Ma, Nick Loman, Oliver Pybus, Changwen Ke |
| EPI_ISL_413855 | hCoV-19/Guangdong/GD2020234-P0023/2020  | Asia / China / Guangdong | 2020-02-07 | Guangdong Provincial Institution of Public Health, Guangdong Provincial Center for Disease Control and Prevention | Guangdong Provincial Institution of Public Health | Jing Lu, Louis du Plessis, Liu Zhe, Jiufeng Sun, Sarah François, Huifang Lin, Moritz Kraemer, Jingju Peng, Qianlin Xiong, Runyu Yuan, Lilian Zeng, Pingping Zhou, Chuming Liang, Tao Liu, Wei Li, Juan Su, Huanying Zheng, Kang Min, Song Tie, Bo Peng, Shisong Fang, Wenzhe Su, Kuibiao Li, Ruilin Sun, Ru bai, Xi Tang, Minfeng Liang, Nuno Faria, Josh Quick, Andrew Rambaut, Verity Hill, Wenjun Ma, Nick Loman, Oliver Pybus, Changwen Ke |
| EPI_ISL_413856 | hCoV-19/Guangdong/GD2020233-P0027/2020  | Asia / China / Guangdong | 2020-02-07 | Guangdong Provincial Institution of Public Health, Guangdong Provincial Center for Disease Control and Prevention | Guangdong Provincial Institution of Public Health | Jing Lu, Louis du Plessis, Liu Zhe, Jiufeng Sun, Sarah François, Huifang Lin, Moritz Kraemer, Jingju Peng, Qianlin Xiong, Runyu Yuan, Lilian Zeng, Pingping Zhou, Chuming Liang, Tao Liu, Wei Li, Juan Su, Huanying Zheng, Kang Min, Song Tie, Bo Peng, Shisong Fang, Wenzhe Su, Kuibiao Li, Ruilin Sun, Ru bai, Xi Tang, Minfeng Liang, Nuno Faria, Josh Quick, Andrew Rambaut, Verity Hill, Wenjun Ma, Nick Loman, Oliver Pybus, Changwen Ke |
| EPI_ISL_413857 | hCoV-19/Guangdong/2020XN4448-P0002/2020 | Asia / China / Guangdong | 2020-01-31 | Guangdong Provincial Institution of Public Health, Guangdong Provincial Center for Disease Control and Prevention | Guangdong Provincial Institution of Public Health | Jing Lu, Louis du Plessis, Liu Zhe, Jiufeng Sun, Sarah François, Huifang Lin, Moritz Kraemer, Jingju Peng, Qianlin Xiong, Runyu Yuan, Lilian Zeng, Pingping Zhou, Chuming Liang, Tao Liu, Wei Li, Juan Su, Huanying Zheng, Kang Min, Song Tie, Bo Peng, Shisong Fang, Wenzhe Su, Kuibiao Li, Ruilin Sun, Ru bai, Xi Tang, Minfeng Liang, Nuno Faria, Josh Quick, Andrew Rambaut, Verity Hill, Wenjun Ma, Nick Loman, Oliver Pybus, Changwen Ke |
| EPI_ISL_413858 | hCoV-19/Guangdong/2020XN4459-P0041/2020 | Asia / China / Guangdong | 2020-01-30 | Guangdong Provincial Institution of Public Health, Guangdong Provincial Center for Disease Control and Prevention | Guangdong Provincial Institution of Public Health | Jing Lu, Louis du Plessis, Liu Zhe, Jiufeng Sun, Sarah François, Huifang Lin, Moritz Kraemer, Jingju Peng, Qianlin Xiong, Runyu Yuan, Lilian Zeng, Pingping Zhou, Chuming Liang, Tao Liu, Wei Li, Juan Su, Huanying Zheng, Kang Min, Song Tie, Bo Peng, Shisong Fang, Wenzhe Su, Kuibiao Li, Ruilin Sun, Ru bai, Xi Tang, Minfeng Liang, Nuno Faria, Josh Quick, Andrew Rambaut, Verity Hill, Wenjun Ma, Nick Loman, Oliver Pybus, Changwen Ke |
| EPI_ISL_413859 | hCoV-19/Guangdong/2020XN4276-P0037/2020 | Asia / China / Guangdong | 2020-01-31 | Guangdong Provincial Institution of Public Health, Guangdong Provincial Center for Disease Control and Prevention | Guangdong Provincial Institution of Public Health | Jing Lu, Louis du Plessis, Liu Zhe, Jiufeng Sun, Sarah François, Huifang Lin, Moritz Kraemer, Jingju Peng, Qianlin Xiong, Runyu Yuan, Lilian Zeng, Pingping Zhou, Chuming Liang, Tao Liu, Wei Li, Juan Su, Huanying Zheng, Kang Min, Song Tie, Bo Peng, Shisong Fang, Wenzhe Su, Kuibiao Li, Ruilin Sun, Ru bai, Xi Tang, Minfeng Liang, Nuno Faria, Josh Quick, Andrew Rambaut, Verity Hill, Wenjun Ma, Nick Loman, Oliver Pybus, Changwen Ke |

|                |                                         |                          |            |                                                                                                                   |                                                   |                                                                                                                                                                                                                                                                                                                                                                                                                                                |
|----------------|-----------------------------------------|--------------------------|------------|-------------------------------------------------------------------------------------------------------------------|---------------------------------------------------|------------------------------------------------------------------------------------------------------------------------------------------------------------------------------------------------------------------------------------------------------------------------------------------------------------------------------------------------------------------------------------------------------------------------------------------------|
| EPI_ISL_413860 | hCoV-19/Guangdong/2020XN4273-P0036/2020 | Asia / China / Guangdong | 2020-01-30 | Guangdong Provincial Institution of Public Health, Guangdong Provincial Center for Disease Control and Prevention | Guangdong Provincial Institution of Public Health | Jing Lu, Louis du Plessis, Liu Zhe, Jiufeng Sun, Sarah François, Huifang Lin, Moritz Kraemer, Jingju Peng, Qianlin Xiong, Runyu Yuan, Lilian Zeng, Pingping Zhou, Chuming Liang, Tao Liu, Wei Li, Juan Su, Huanying Zheng, Kang Min, Song Tie, Bo Peng, Shisong Fang, Wenzhe Su, Kuibiao Li, Ruilin Sun, Ru bai, Xi Tang, Minfeng Liang, Nuno Faria, Josh Quick, Andrew Rambaut, Verity Hill, Wenjun Ma, Nick Loman, Oliver Pybus, Changwen Ke |
| EPI_ISL_413861 | hCoV-19/Guangdong/GD2020080-P0010/2020  | Asia / China / Guangdong | 2020-02-01 | Guangdong Provincial Institution of Public Health, Guangdong Provincial Center for Disease Control and Prevention | Guangdong Provincial Institution of Public Health | Jing Lu, Louis du Plessis, Liu Zhe, Jiufeng Sun, Sarah François, Huifang Lin, Moritz Kraemer, Jingju Peng, Qianlin Xiong, Runyu Yuan, Lilian Zeng, Pingping Zhou, Chuming Liang, Tao Liu, Wei Li, Juan Su, Huanying Zheng, Kang Min, Song Tie, Bo Peng, Shisong Fang, Wenzhe Su, Kuibiao Li, Ruilin Sun, Ru bai, Xi Tang, Minfeng Liang, Nuno Faria, Josh Quick, Andrew Rambaut, Verity Hill, Wenjun Ma, Nick Loman, Oliver Pybus, Changwen Ke |
| EPI_ISL_413862 | hCoV-19/Guangdong/GD2020086-P0021/2020  | Asia / China / Guangdong | 2020-02-01 | Guangdong Provincial Institution of Public Health, Guangdong Provincial Center for Disease Control and Prevention | Guangdong Provincial Institution of Public Health | Jing Lu, Louis du Plessis, Liu Zhe, Jiufeng Sun, Sarah François, Huifang Lin, Moritz Kraemer, Jingju Peng, Qianlin Xiong, Runyu Yuan, Lilian Zeng, Pingping Zhou, Chuming Liang, Tao Liu, Wei Li, Juan Su, Huanying Zheng, Kang Min, Song Tie, Bo Peng, Shisong Fang, Wenzhe Su, Kuibiao Li, Ruilin Sun, Ru bai, Xi Tang, Minfeng Liang, Nuno Faria, Josh Quick, Andrew Rambaut, Verity Hill, Wenjun Ma, Nick Loman, Oliver Pybus, Changwen Ke |
| EPI_ISL_413863 | hCoV-19/Guangdong/GD2020087-P0008/2020  | Asia / China / Guangdong | 2020-02-01 | Guangdong Provincial Institution of Public Health, Guangdong Provincial Center for Disease Control and Prevention | Guangdong Provincial Institution of Public Health | Jing Lu, Louis du Plessis, Liu Zhe, Jiufeng Sun, Sarah François, Huifang Lin, Moritz Kraemer, Jingju Peng, Qianlin Xiong, Runyu Yuan, Lilian Zeng, Pingping Zhou, Chuming Liang, Tao Liu, Wei Li, Juan Su, Huanying Zheng, Kang Min, Song Tie, Bo Peng, Shisong Fang, Wenzhe Su, Kuibiao Li, Ruilin Sun, Ru bai, Xi Tang, Minfeng Liang, Nuno Faria, Josh Quick, Andrew Rambaut, Verity Hill, Wenjun Ma, Nick Loman, Oliver Pybus, Changwen Ke |
| EPI_ISL_413864 | hCoV-19/Guangdong/GD2020246-P0028/2020  | Asia / China / Guangdong | 2020-02-09 | Guangdong Provincial Institution of Public Health, Guangdong Provincial Center for Disease Control and Prevention | Guangdong Provincial Institution of Public Health | Jing Lu, Louis du Plessis, Liu Zhe, Jiufeng Sun, Sarah François, Huifang Lin, Moritz Kraemer, Jingju Peng, Qianlin Xiong, Runyu Yuan, Lilian Zeng, Pingping Zhou, Chuming Liang, Tao Liu, Wei Li, Juan Su, Huanying Zheng, Kang Min, Song Tie, Bo Peng, Shisong Fang, Wenzhe Su, Kuibiao Li, Ruilin Sun, Ru bai, Xi Tang, Minfeng Liang, Nuno Faria, Josh Quick, Andrew Rambaut, Verity Hill, Wenjun Ma, Nick Loman, Oliver Pybus, Changwen Ke |
| EPI_ISL_413866 | hCoV-19/Guangdong/GDSZ2008-P0020/2020   | Asia / China / Guangdong | 2020-02-05 | Guangdong Provincial Institution of Public Health, Guangdong Provincial Center for Disease Control and Prevention | Guangdong Provincial Institution of Public Health | Jing Lu, Louis du Plessis, Liu Zhe, Jiufeng Sun, Sarah François, Huifang Lin, Moritz Kraemer, Jingju Peng, Qianlin Xiong, Runyu Yuan, Lilian Zeng, Pingping Zhou, Chuming Liang, Tao Liu, Wei Li, Juan Su, Huanying Zheng, Kang Min, Song Tie, Bo Peng, Shisong Fang, Wenzhe Su, Kuibiao Li, Ruilin Sun, Ru bai, Xi Tang, Minfeng Liang, Nuno Faria, Josh Quick, Andrew Rambaut, Verity Hill, Wenjun Ma, Nick Loman, Oliver Pybus, Changwen Ke |
| EPI_ISL_413867 | hCoV-19/Guangdong/GDSZ2015-P0019/2020   | Asia / China / Guangdong | 2020-02-05 | Guangdong Provincial Institution of Public Health, Guangdong Provincial Center                                    | Guangdong Provincial Institution of Public Health | Jing Lu, Louis du Plessis, Liu Zhe, Jiufeng Sun, Sarah François, Huifang Lin, Moritz Kraemer, Jingju Peng, Qianlin Xiong, Runyu Yuan, Lilian Zeng, Pingping Zhou, Chuming Liang, Tao Liu, Wei Li, Juan Su, Huanying Zheng, Kang Min, Song Tie, Bo Peng, Shisong Fang, Wenzhe Su, Kuibiao                                                                                                                                                       |

|                |                                     |                          |            |                                                                                                                   |                                                   |                                                                                                                                                                                                                                                                                                                                                                                                                                                |
|----------------|-------------------------------------|--------------------------|------------|-------------------------------------------------------------------------------------------------------------------|---------------------------------------------------|------------------------------------------------------------------------------------------------------------------------------------------------------------------------------------------------------------------------------------------------------------------------------------------------------------------------------------------------------------------------------------------------------------------------------------------------|
|                |                                     |                          |            | for Disease Control and Prevention                                                                                |                                                   | Li, Ruilin Sun, Ru bai, Xi Tang, Minfeng Liang, Nuno Faria, Josh Quick, Andrew Rambaut, Verity Hill, Wenjun Ma, Nick Loman, Oliver Pybus, Changwen Ke                                                                                                                                                                                                                                                                                          |
| EPI_ISL_413868 | hCoV-19/Guangdong/DG-S9-P0045/2020  | Asia / China / Guangdong | 2020-02-28 | Guangdong Provincial Institution of Public Health, Guangdong Provincial Center for Disease Control and Prevention | Guangdong Provincial Institution of Public Health | Jing Lu, Louis du Plessis, Liu Zhe, Jiufeng Sun, Sarah François, Huifang Lin, Moritz Kraemer, Jingju Peng, Qianlin Xiong, Runyu Yuan, Lilian Zeng, Pingping Zhou, Chuming Liang, Tao Liu, Wei Li, Juan Su, Huanying Zheng, Kang Min, Song Tie, Bo Peng, Shisong Fang, Wenzhe Su, Kuibiao Li, Ruilin Sun, Ru bai, Xi Tang, Minfeng Liang, Nuno Faria, Josh Quick, Andrew Rambaut, Verity Hill, Wenjun Ma, Nick Loman, Oliver Pybus, Changwen Ke |
| EPI_ISL_413869 | hCoV-19/Guangdong/FS-S42-P0046/2020 | Asia / China / Guangdong | 2020-02-28 | Guangdong Provincial Institution of Public Health, Guangdong Provincial Center for Disease Control and Prevention | Guangdong Provincial Institution of Public Health | Jing Lu, Louis du Plessis, Liu Zhe, Jiufeng Sun, Sarah François, Huifang Lin, Moritz Kraemer, Jingju Peng, Qianlin Xiong, Runyu Yuan, Lilian Zeng, Pingping Zhou, Chuming Liang, Tao Liu, Wei Li, Juan Su, Huanying Zheng, Kang Min, Song Tie, Bo Peng, Shisong Fang, Wenzhe Su, Kuibiao Li, Ruilin Sun, Ru bai, Xi Tang, Minfeng Liang, Nuno Faria, Josh Quick, Andrew Rambaut, Verity Hill, Wenjun Ma, Nick Loman, Oliver Pybus, Changwen Ke |
| EPI_ISL_413870 | hCoV-19/Guangdong/FS-S48-P0047/2020 | Asia / China / Guangdong | 2020-02-28 | Guangdong Provincial Institution of Public Health, Guangdong Provincial Center for Disease Control and Prevention | Guangdong Provincial Institution of Public Health | Jing Lu, Louis du Plessis, Liu Zhe, Jiufeng Sun, Sarah François, Huifang Lin, Moritz Kraemer, Jingju Peng, Qianlin Xiong, Runyu Yuan, Lilian Zeng, Pingping Zhou, Chuming Liang, Tao Liu, Wei Li, Juan Su, Huanying Zheng, Kang Min, Song Tie, Bo Peng, Shisong Fang, Wenzhe Su, Kuibiao Li, Ruilin Sun, Ru bai, Xi Tang, Minfeng Liang, Nuno Faria, Josh Quick, Andrew Rambaut, Verity Hill, Wenjun Ma, Nick Loman, Oliver Pybus, Changwen Ke |
| EPI_ISL_413871 | hCoV-19/Guangdong/MM-S1-P0048/2020  | Asia / China / Guangdong | 2020-02-28 | Guangdong Provincial Institution of Public Health, Guangdong Provincial Center for Disease Control and Prevention | Guangdong Provincial Institution of Public Health | Jing Lu, Louis du Plessis, Liu Zhe, Jiufeng Sun, Sarah François, Huifang Lin, Moritz Kraemer, Jingju Peng, Qianlin Xiong, Runyu Yuan, Lilian Zeng, Pingping Zhou, Chuming Liang, Tao Liu, Wei Li, Juan Su, Huanying Zheng, Kang Min, Song Tie, Bo Peng, Shisong Fang, Wenzhe Su, Kuibiao Li, Ruilin Sun, Ru bai, Xi Tang, Minfeng Liang, Nuno Faria, Josh Quick, Andrew Rambaut, Verity Hill, Wenjun Ma, Nick Loman, Oliver Pybus, Changwen Ke |
| EPI_ISL_413872 | hCoV-19/Guangdong/SZ-N59-P0049/2020 | Asia / China / Guangdong | 2020-02-28 | Guangdong Provincial Institution of Public Health, Guangdong Provincial Center for Disease Control and Prevention | Guangdong Provincial Institution of Public Health | Jing Lu, Louis du Plessis, Liu Zhe, Jiufeng Sun, Sarah François, Huifang Lin, Moritz Kraemer, Jingju Peng, Qianlin Xiong, Runyu Yuan, Lilian Zeng, Pingping Zhou, Chuming Liang, Tao Liu, Wei Li, Juan Su, Huanying Zheng, Kang Min, Song Tie, Bo Peng, Shisong Fang, Wenzhe Su, Kuibiao Li, Ruilin Sun, Ru bai, Xi Tang, Minfeng Liang, Nuno Faria, Josh Quick, Andrew Rambaut, Verity Hill, Wenjun Ma, Nick Loman, Oliver Pybus, Changwen Ke |
| EPI_ISL_413873 | hCoV-19/Guangdong/GZ-S6-P0050/2020  | Asia / China / Guangdong | 2020-02-28 | Guangdong Provincial Institution of Public Health, Guangdong Provincial Center for Disease Control and Prevention | Guangdong Provincial Institution of Public Health | Jing Lu, Louis du Plessis, Liu Zhe, Jiufeng Sun, Sarah François, Huifang Lin, Moritz Kraemer, Jingju Peng, Qianlin Xiong, Runyu Yuan, Lilian Zeng, Pingping Zhou, Chuming Liang, Tao Liu, Wei Li, Juan Su, Huanying Zheng, Kang Min, Song Tie, Bo Peng, Shisong Fang, Wenzhe Su, Kuibiao Li, Ruilin Sun, Ru bai, Xi Tang, Minfeng Liang, Nuno Faria, Josh Quick, Andrew Rambaut, Verity Hill, Wenjun Ma, Nick Loman, Oliver Pybus, Changwen Ke |

|                |                                          |                          |            |                                                                                                                   |                                                   |                                                                                                                                                                                                                                                                                                                                                                                                                                                |
|----------------|------------------------------------------|--------------------------|------------|-------------------------------------------------------------------------------------------------------------------|---------------------------------------------------|------------------------------------------------------------------------------------------------------------------------------------------------------------------------------------------------------------------------------------------------------------------------------------------------------------------------------------------------------------------------------------------------------------------------------------------------|
| EPI_ISL_413874 | hCoV-19/Guangdong/GDFS2020127-P0026/2020 | Asia / China / Guangdong | 2020-02-12 | Guangdong Provincial Institution of Public Health, Guangdong Provincial Center for Disease Control and Prevention | Guangdong Provincial Institution of Public Health | Jing Lu, Louis du Plessis, Liu Zhe, Jiufeng Sun, Sarah François, Huifang Lin, Moritz Kraemer, Jingju Peng, Qianlin Xiong, Runyu Yuan, Lilian Zeng, Pingping Zhou, Chuming Liang, Tao Liu, Wei Li, Juan Su, Huanying Zheng, Kang Min, Song Tie, Bo Peng, Shisong Fang, Wenzhe Su, Kuibiao Li, Ruilin Sun, Ru bai, Xi Tang, Minfeng Liang, Nuno Faria, Josh Quick, Andrew Rambaut, Verity Hill, Wenjun Ma, Nick Loman, Oliver Pybus, Changwen Ke |
| EPI_ISL_413875 | hCoV-19/Guangdong/GDFS2020052-P0025/2020 | Asia / China / Guangdong | 2020-02-10 | Guangdong Provincial Institution of Public Health, Guangdong Provincial Center for Disease Control and Prevention | Guangdong Provincial Institution of Public Health | Jing Lu, Louis du Plessis, Liu Zhe, Jiufeng Sun, Sarah François, Huifang Lin, Moritz Kraemer, Jingju Peng, Qianlin Xiong, Runyu Yuan, Lilian Zeng, Pingping Zhou, Chuming Liang, Tao Liu, Wei Li, Juan Su, Huanying Zheng, Kang Min, Song Tie, Bo Peng, Shisong Fang, Wenzhe Su, Kuibiao Li, Ruilin Sun, Ru bai, Xi Tang, Minfeng Liang, Nuno Faria, Josh Quick, Andrew Rambaut, Verity Hill, Wenjun Ma, Nick Loman, Oliver Pybus, Changwen Ke |
| EPI_ISL_413882 | hCoV-19/Guangdong/GD2020139-P0007/2020   | Asia / China / Guangdong | 2020-02-02 | Guangdong Provincial Institution of Public Health, Guangdong Provincial Center for Disease Control and Prevention | Guangdong Provincial Institution of Public Health | Jing Lu, Louis du Plessis, Liu Zhe, Jiufeng Sun, Sarah François, Huifang Lin, Moritz Kraemer, Jingju Peng, Qianlin Xiong, Runyu Yuan, Lilian Zeng, Pingping Zhou, Chuming Liang, Tao Liu, Wei Li, Juan Su, Huanying Zheng, Kang Min, Song Tie, Bo Peng, Shisong Fang, Wenzhe Su, Kuibiao Li, Ruilin Sun, Ru bai, Xi Tang, Minfeng Liang, Nuno Faria, Josh Quick, Andrew Rambaut, Verity Hill, Wenjun Ma, Nick Loman, Oliver Pybus, Changwen Ke |
| EPI_ISL_413883 | hCoV-19/Guangdong/GD2020134-P0031/2020   | Asia / China / Guangdong | 2020-02-02 | Guangdong Provincial Institution of Public Health, Guangdong Provincial Center for Disease Control and Prevention | Guangdong Provincial Institution of Public Health | Jing Lu, Louis du Plessis, Liu Zhe, Jiufeng Sun, Sarah François, Huifang Lin, Moritz Kraemer, Jingju Peng, Qianlin Xiong, Runyu Yuan, Lilian Zeng, Pingping Zhou, Chuming Liang, Tao Liu, Wei Li, Juan Su, Huanying Zheng, Kang Min, Song Tie, Bo Peng, Shisong Fang, Wenzhe Su, Kuibiao Li, Ruilin Sun, Ru bai, Xi Tang, Minfeng Liang, Nuno Faria, Josh Quick, Andrew Rambaut, Verity Hill, Wenjun Ma, Nick Loman, Oliver Pybus, Changwen Ke |
| EPI_ISL_413884 | hCoV-19/Guangdong/GD2020115-P0009/2020   | Asia / China / Guangdong | 2020-02-01 | Guangdong Provincial Institution of Public Health, Guangdong Provincial Center for Disease Control and Prevention | Guangdong Provincial Institution of Public Health | Jing Lu, Louis du Plessis, Liu Zhe, Jiufeng Sun, Sarah François, Huifang Lin, Moritz Kraemer, Jingju Peng, Qianlin Xiong, Runyu Yuan, Lilian Zeng, Pingping Zhou, Chuming Liang, Tao Liu, Wei Li, Juan Su, Huanying Zheng, Kang Min, Song Tie, Bo Peng, Shisong Fang, Wenzhe Su, Kuibiao Li, Ruilin Sun, Ru bai, Xi Tang, Minfeng Liang, Nuno Faria, Josh Quick, Andrew Rambaut, Verity Hill, Wenjun Ma, Nick Loman, Oliver Pybus, Changwen Ke |
| EPI_ISL_413888 | hCoV-19/Guangdong/2020XN4239-P0034/2020  | Asia / China / Guangdong | 2020-01-30 | Guangdong Provincial Institution of Public Health, Guangdong Provincial Center for Disease Control and Prevention | Guangdong Provincial Institution of Public Health | Jing Lu, Louis du Plessis, Liu Zhe, Jiufeng Sun, Sarah François, Huifang Lin, Moritz Kraemer, Jingju Peng, Qianlin Xiong, Runyu Yuan, Lilian Zeng, Pingping Zhou, Chuming Liang, Tao Liu, Wei Li, Juan Su, Huanying Zheng, Kang Min, Song Tie, Bo Peng, Shisong Fang, Wenzhe Su, Kuibiao Li, Ruilin Sun, Ru bai, Xi Tang, Minfeng Liang, Nuno Faria, Josh Quick, Andrew Rambaut, Verity Hill, Wenjun Ma, Nick Loman, Oliver Pybus, Changwen Ke |
| EPI_ISL_413889 | hCoV-19/Guangdong/2020XN4291-P0038/2020  | Asia / China / Guangdong | 2020-01-30 | Guangdong Provincial Institution of Public Health, Guangdong Provincial Center                                    | Guangdong Provincial Institution of Public Health | Jing Lu, Louis du Plessis, Liu Zhe, Jiufeng Sun, Sarah François, Huifang Lin, Moritz Kraemer, Jingju Peng, Qianlin Xiong, Runyu Yuan, Lilian Zeng, Pingping Zhou, Chuming Liang, Tao Liu, Wei Li, Juan Su, Huanying Zheng, Kang Min, Song Tie, Bo Peng, Shisong Fang, Wenzhe Su, Kuibiao                                                                                                                                                       |



|  |  |  |  |                                    |  |                                                                                                                                                       |
|--|--|--|--|------------------------------------|--|-------------------------------------------------------------------------------------------------------------------------------------------------------|
|  |  |  |  | for Disease Control and Prevention |  | Li, Ruilin Sun, Ru bai, Xi Tang, Minfeng Liang, Nuno Faria, Josh Quick, Andrew Rambaut, Verity Hill, Wenjun Ma, Nick Loman, Oliver Pybus, Changwen Ke |
|--|--|--|--|------------------------------------|--|-------------------------------------------------------------------------------------------------------------------------------------------------------|

## References

1. Baele, G., Lemey, P. & Suchard, M. A. Genealogical Working Distributions for Bayesian Model Testing with Phylogenetic Uncertainty. *Systematic Biology* vol. 65 250–264 (2016).
2. Suchard, M. A. *et al.* Bayesian phylogenetic and phylodynamic data integration using BEAST 1.10. *Virus Evol* **4**, vey016 (2018).
3. Kass, R. E. & Raftery, A. E. Bayes factors. *J. Am. Stat. Assoc.* **90**, 773–795 (1995).
